# Supplementary material for: Dearomative C–C and C–N bond cleavage of 2-arylindoles: transition-metal-free access to 2-aminoarylphenones
Source: Royal Society of Chemistry journal article supplement (doi:10.1039/c5qo00394f), 2016-01-01

*Electronic Supplementary Information*

**Dearomative C–C and C–N Bond Cleavage of 2-Arylindoles:  
Transition-Metal-Free Access to 2-Aminoarylphenones**

Shuang Luo,\* Ziwei Hu, and Qiang Zhu\*

*State Key Laboratory of Respiratory Disease, Guangzhou Institutes of Biomedicine  
and Health, Chinese Academy of Sciences, 190 Kaiyuan Avenue, Guangzhou 510530,  
China*

*luo\_shuang@gibh.ac.cn; zhu\_qiang@gibh.ac.cn*

**Table of Contents**

|                                                                     |    |
|---------------------------------------------------------------------|----|
| I. General Information.....                                         | 2  |
| II. Preparation of Substrates.....                                  | 2  |
| III. General Procedure.....                                         | 3  |
| IV. Screening of the Reaction Conditions.....                       | 3  |
| V. Mechanistic Studies.....                                         | 6  |
| VI. Product Characterization.....                                   | 6  |
| VII. References.....                                                | 14 |
| VIII. Copies of <sup>1</sup> H and <sup>13</sup> C NMR Spectra..... | 15 |

## I. General Information

All reactions dealing with air- and moisture-sensitive compounds were carried out in dry reaction vessels under a nitrogen atmosphere. Column chromatography was conducted with 200-300 mesh silica gel.  $^1\text{H}$  NMR (400 MHz) and  $^{13}\text{C}$  NMR (125 MHz) were registered on Bruker 400 M or 500 M spectrometers. Chemical shifts were reported in units (ppm) by assigning TMS resonance in the  $^1\text{H}$  spectrum as 0.00 ppm,  $\text{CDCl}_3$  resonance in the  $^{13}\text{C}$  spectrum as 77.0 ppm. All coupling constants ( $J$  values) were reported in Hertz (Hz). The following abbreviations were used to describe peak splitting patterns when appropriate: br s = broad singlet, s = singlet, d = doublet, t = triplet, q = quartet, m = multiplet. High resolution mass spectra (HRMS) were obtained on an ESI-LC-MS/MS spectrometer.

**Materials.** Unless otherwise noted, materials were purchased from Alfa Aesar, and other commercial suppliers and were used as received.

## II. Preparation of Substrates

2-Phenylindole **1a** was purchased from Alfa Aesar. 2-Arylindoles **1b-1i**, **1k-1m**, **1o**, **1q**, **1s** and **1t** were prepared by Pd-catalyzed direct arylation of arenes with aryl boronic acids according to the literature procedure.<sup>[1]</sup> Other 2-arylindoles **1j**, **1n**, **1p**, **1r**, **1u** and **1v** were synthesized by the well-known Fischer indole synthesis.<sup>[2]</sup>  $^1\text{H}$  and  $^{13}\text{C}$  spectra of known compounds were in accordance with those described in literatures.

2-Phenyl-2- $^{13}\text{C}$ indole ( $^{13}\text{C}$ -**1a**) was prepared according to the following procedure.<sup>[3,4]</sup> Phenyl- $\alpha$ - $^{13}\text{C}$ acetylene was prepared according to the literature procedure.<sup>[5]</sup>

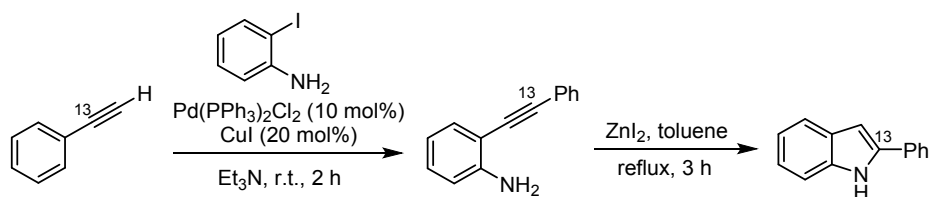

### III. General Procedure

A 10 mL Schlenk tube equipped with a stirrer bar was charged with 2-arylidole (0.20 mmol), Cs<sub>2</sub>CO<sub>3</sub> (130.3 mg, 0.40 mmol, 2.0 equiv) and DMSO (1.0 mL). The Schlenk tube was sealed with a rubber stopper in air and a balloon filled with O<sub>2</sub> was attached to it through a needle. Then, the reaction mixture was stirred at 120 °C for 16 h. Upon cooling to room temperature, the reaction mixture was directly subjected to flash chromatography on silica gel to afford the product.

### IV. Screening of the Reaction Conditions

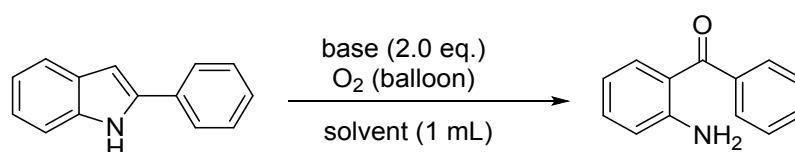

| Entry | Base                            | Solvent            | Additive | Time | Temp.  | Yield (%) |
|-------|---------------------------------|--------------------|----------|------|--------|-----------|
| 1     | Cs <sub>2</sub> CO <sub>3</sub> | DMSO               |          | 18 h | 120 °C | 51        |
| 2     | Cs <sub>2</sub> CO <sub>3</sub> | Toluene            |          | 18 h | 120 °C | NR        |
| 3     | Cs <sub>2</sub> CO <sub>3</sub> | dioxane            |          | 18 h | 120 °C | NR        |
| 4     | Cs <sub>2</sub> CO <sub>3</sub> | DCE                |          | 18 h | 120 °C | NR        |
| 5     | Cs <sub>2</sub> CO <sub>3</sub> | CH <sub>3</sub> CN |          | 18 h | 120 °C | NR        |
| 6     | Cs <sub>2</sub> CO <sub>3</sub> | DMF                |          | 18 h | 120 °C | 20        |
| 7     | Cs <sub>2</sub> CO <sub>3</sub> | NMP                |          | 18 h | 120 °C | ND        |
| 8     | K <sub>3</sub> PO <sub>4</sub>  | DMSO               |          | 18 h | 120 °C | NR        |
| 9     | K <sub>2</sub> CO <sub>3</sub>  | DMSO               |          | 18 h | 120 °C | NR        |
| 10    | KO <sup>t</sup> Bu              | DMSO               |          | 18 h | 120 °C | NR        |
| 11    | Na <sub>2</sub> CO <sub>3</sub> | DMSO               |          | 18 h | 120 °C | NR        |
| 12    | CsOAc                           | DMSO               |          | 18 h | 120 °C | NR        |
| 13    | LiOH                            | DMSO               |          | 18 h | 120 °C | 9         |
| 14    | DBU                             | DMSO               |          | 18 h | 120 °C | NR        |
| 15    | TEA                             | DMSO               |          | 18 h | 120 °C | NR        |

|    |                                              |                     |                                |      |        |       |
|----|----------------------------------------------|---------------------|--------------------------------|------|--------|-------|
| 16 | Pyridine                                     | DMSO                |                                | 18 h | 120 °C | NR    |
| 17 | Cs <sub>2</sub> CO <sub>3</sub>              | DMSO<br>(anhydrous) | 4Å MS                          | 18 h | 120 °C | 38    |
| 18 | Cs <sub>2</sub> CO <sub>3</sub>              | DMSO<br>(anhydrous) |                                | 18 h | 120 °C | 44    |
| 19 | Cs <sub>2</sub> CO <sub>3</sub>              | DMSO<br>(anhydrous) | H <sub>2</sub> O (1.0 eq.)     | 18 h | 120 °C | 45    |
| 20 | Cs <sub>2</sub> CO <sub>3</sub>              | DMSO<br>(anhydrous) | H <sub>2</sub> O (5.0 eq.)     | 18 h | 120 °C | 47    |
| 21 | Cs <sub>2</sub> CO <sub>3</sub>              | DMSO<br>(anhydrous) | H <sub>2</sub> O (10.0<br>eq.) | 18 h | 120 °C | 52    |
| 22 | Cs <sub>2</sub> CO <sub>3</sub>              | DMSO<br>(anhydrous) | H <sub>2</sub> O (15.0<br>eq.) | 18 h | 120 °C | 48    |
| 23 | Cs <sub>2</sub> CO <sub>3</sub>              | DMSO                |                                | 16 h | 120 °C | 56    |
| 24 | Cs <sub>2</sub> CO <sub>3</sub>              | DMSO                |                                | 16 h | 110 °C | 18    |
| 25 | Cs <sub>2</sub> CO <sub>3</sub>              | DMSO                |                                | 16 h | 130 °C | 51    |
| 26 | Cs <sub>2</sub> CO <sub>3</sub><br>(1.8 eq.) | DMSO                |                                | 16 h | 120 °C | 49    |
| 27 | Cs <sub>2</sub> CO <sub>3</sub><br>(2.2 eq.) | DMSO                |                                | 16 h | 120 °C | 56    |
| 28 | Cs <sub>2</sub> CO <sub>3</sub><br>(2.5 eq.) | DMSO                |                                | 16 h | 120 °C | 56    |
| 29 | Cs <sub>2</sub> CO <sub>3</sub>              | DMSO<br>(2 mL)      |                                | 16 h | 120 °C | 43    |
| 30 | Cs <sub>2</sub> CO <sub>3</sub>              | DMSO                | TBAC (1.0<br>eq.)              | 16 h | 120 °C | trace |
| 31 | Cs <sub>2</sub> CO <sub>3</sub>              | DMSO                | TBAB (1.0<br>eq.)              | 16 h | 120 °C | 40    |
| 32 | Cs <sub>2</sub> CO <sub>3</sub>              | DMSO                | TBAI (1.0                      | 16 h | 120 °C | 33    |

|                   |                                 |         |                                                           |      |        |    |
|-------------------|---------------------------------|---------|-----------------------------------------------------------|------|--------|----|
|                   |                                 |         | eq.)                                                      |      |        |    |
| 33                | CS <sub>2</sub> CO <sub>3</sub> | DMSO    | H <sub>2</sub> O (5.0 eq.)                                | 16 h | 120 °C | 41 |
| 34                | CS <sub>2</sub> CO <sub>3</sub> | DMSO    | BQ (2.0 eq.)                                              | 16 h | 120 °C | NR |
| 35                | CS <sub>2</sub> CO <sub>3</sub> | DMSO    | K <sub>2</sub> S <sub>2</sub> O <sub>8</sub><br>(2.0 eq.) | 16 h | 120 °C | NR |
| 36                | CS <sub>2</sub> CO <sub>3</sub> | DMSO    | Oxone (2.0<br>eq.)                                        | 16 h | 120 °C | NR |
| 37                | CS <sub>2</sub> CO <sub>3</sub> | DMSO    | TBHP (2.0<br>eq.)                                         | 16 h | 120 °C | ND |
| 38                | CS <sub>2</sub> CO <sub>3</sub> | DMSO    | TEMPO<br>(0.2 eq.)                                        | 16 h | 120 °C | 51 |
| 39                | CS <sub>2</sub> CO <sub>3</sub> | dioxane | TBAB (1.0<br>eq.)                                         | 16 h | 120 °C | NR |
| 40                | CS <sub>2</sub> CO <sub>3</sub> | DMSO    | Cu(OAc) <sub>2</sub><br>(0.1 eq)                          | 16 h | 120 °C | 54 |
| 41                | CS <sub>2</sub> CO <sub>3</sub> | DMSO    | Mn(Oac) <sub>2</sub><br>(5 mol%)                          | 16 h | 120 °C | 43 |
| 42                | CS <sub>2</sub> CO <sub>3</sub> | DMSO    | MnSO <sub>4</sub><br>(5 mol%)                             | 16 h | 120 °C | 53 |
| 43                | CS <sub>2</sub> CO <sub>3</sub> | DMSO    | PPh <sub>3</sub><br>(20 mol%)                             | 16 h | 120 °C | 48 |
| 44 <sup>b</sup>   | CS <sub>2</sub> CO <sub>3</sub> | DMSO    |                                                           | 16 h | 120 °C | 73 |
| 45 <sup>b,c</sup> | CS <sub>2</sub> CO <sub>3</sub> | DMSO    |                                                           | 16 h | 120 °C | 78 |
| 46 <sup>b,d</sup> | CS <sub>2</sub> CO <sub>3</sub> | DMSO    |                                                           | 16 h | 120 °C | 42 |

<sup>a</sup> Reaction conditions: **1a** (0.2 mmol), solvent (1 mL), base (2.0 equiv), degassed with O<sub>2</sub>, 120 °C, 18 h, O<sub>2</sub> balloon, in a 50 mL Schlenk tube. NMR yields with CH<sub>2</sub>Br<sub>2</sub> as an internal standard. NR = No reaction. ND = Not detected. <sup>b</sup> Without degassing with O<sub>2</sub>. <sup>c</sup> Reaction was run in a 10 mL Schlenk tube. <sup>d</sup> Reaction was run in a 100 mL Schlenk tube.

## V. Mechanistic Studies

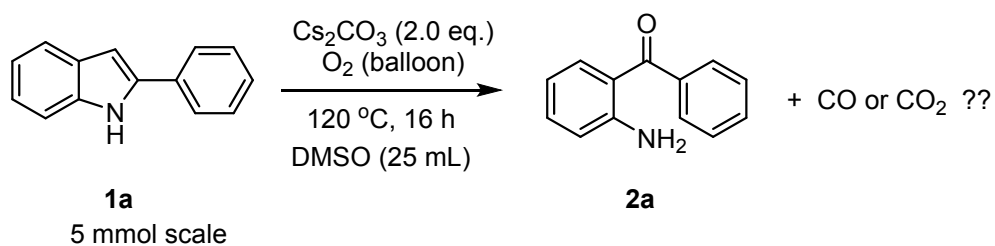

A 250 mL flask equipped with a stirrer bar was charged with 2-phenylindole (5.0 mmol), Cs<sub>2</sub>CO<sub>3</sub> (10.0 mmol, 2.0 eq.) and DMSO (25 mL). The flask was attached to a balloon filled with O<sub>2</sub> and sealed with a rubber stopper. Then the reaction mixture was stirred at 120 °C for 16 h. After completion of the reaction, the gas in the attached balloon was bubbled through a solution of limewater via a long needle.

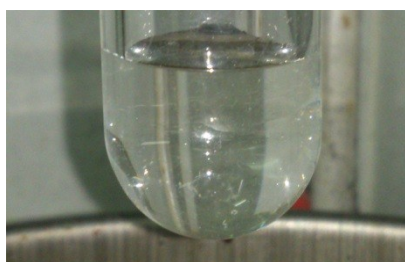

before bubbling

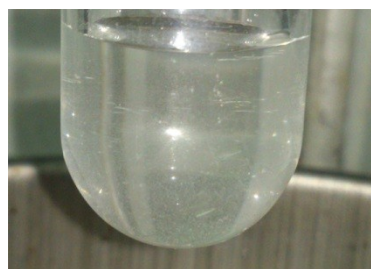

after bubbling

## VI. Product Characterization

(2-aminophenyl)(phenyl)methanone (**2a**)<sup>[6]</sup>

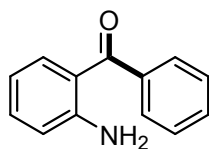

Yellow solid, 28.8 mg. <sup>1</sup>H NMR (400 MHz, CDCl<sub>3</sub>) δ 7.64-7.62 (m, 2H), 7.53-7.50 (m, 1H), 7.46-7.43 (m, 3H), 7.30-7.25 (m, 1H), 6.73 (d, *J* = 8.4 Hz, 1H), 6.61-6.58 (m, 1H), 6.08 (br s, 2H); <sup>13</sup>C NMR (125 MHz, CDCl<sub>3</sub>) δ 199.0, 150.9, 140.1, 134.5, 134.2, 131.0, 129.1, 128.0, 118.2, 117.0, 115.5; MS (ESI) *m/z*: 198 ([M+H]<sup>+</sup>).

(2-aminophenyl)(*o*-tolyl)methanone (**2b**)<sup>[7]</sup>

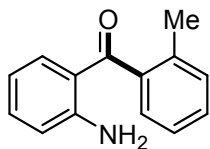

Yellow solid, 24.5 mg.  $^1\text{H}$  NMR (400 MHz,  $\text{CDCl}_3$ )  $\delta$  7.36-7.32 (m, 1H), 7.29-7.19 (m, 5H), 6.70 (d,  $J = 8.4$  Hz, 1H), 6.54-6.50 (m, 1H), 6.40 (br s, 2H), 2.26 (s, 3H);  $^{13}\text{C}$  NMR (125 MHz,  $\text{CDCl}_3$ )  $\delta$  201.3, 151.2, 140.6, 135.0, 134.8, 134.7, 130.5, 129.1, 127.1, 125.2, 118.4, 116.9, 115.6, 19.4; MS (EI)  $m/z$ : 212 ( $[\text{M}+\text{H}]^+$ ).

(2-aminophenyl)(*m*-tolyl)methanone (**2c**)<sup>[7]</sup>

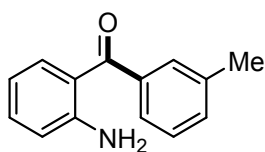

Yellow solid, 27.7 mg.  $^1\text{H}$  NMR (400 MHz,  $\text{CDCl}_3$ )  $\delta$  7.45-7.43 (m, 2H), 7.41-7.39 (m, 1H), 7.33-7.31 (m, 2H), 7.29-7.24 (m, 1H), 6.71 (d,  $J = 8.4$  Hz, 1H), 6.61-6.57 (m, 1H), 6.07 (br s, 2H), 2.40 (s, 3H);  $^{13}\text{C}$  NMR (125 MHz,  $\text{CDCl}_3$ )  $\delta$  199.3, 150.8, 140.1, 137.9, 134.5, 134.1, 131.7, 129.5, 127.8, 126.3, 118.3, 116.9, 115.4, 21.3; MS (EI)  $m/z$ : 212 ( $[\text{M}+\text{H}]^+$ ).

(2-aminophenyl)(*p*-tolyl)methanone (**2d**)<sup>[7]</sup>

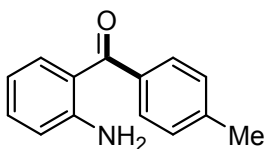

Yellow solid, 17.0 mg.  $^1\text{H}$  NMR (400 MHz,  $\text{CDCl}_3$ )  $\delta$  7.56 (d,  $J = 8.0$  Hz, 2H), 7.45 (dd,  $J_1 = 8.0$  Hz,  $J_2 = 1.6$  Hz, 1H), 7.30-7.24 (m, 3H), 6.72 (d,  $J = 8.4$  Hz, 1H), 6.62-6.58 (m, 1H), 5.99 (br s, 2H), 2.42 (s, 3H);  $^{13}\text{C}$  NMR (125 MHz,  $\text{CDCl}_3$ )  $\delta$  198.8, 150.7, 141.6, 137.2, 134.4, 133.9, 129.4, 128.7, 118.6, 116.9, 115.5, 21.5; MS (EI)  $m/z$ : 212 ( $[\text{M}+\text{H}]^+$ ).

(2-aminophenyl)(4-(*tert*-butyl)phenyl)methanone (**2e**)<sup>[8]</sup>

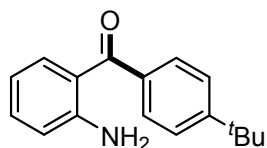

Yellow solid, 29.3 mg.  $^1\text{H}$  NMR (400 MHz,  $\text{CDCl}_3$ )  $\delta$  7.61-7.59 (m, 2H), 7.50-7.45 (m, 3H), 7.30-7.25 (m, 1H), 6.72 (d,  $J = 7.6$  Hz, 1H), 6.62-6.58 (m, 1H), 6.01 (br s, 2H), 1.36 (s, 9H);  $^{13}\text{C}$  NMR (125 MHz,  $\text{CDCl}_3$ )  $\delta$  198.8, 154.7, 150.7, 137.2, 134.5, 133.9, 129.2, 125.0, 118.6, 116.9, 115.4, 34.9, 31.2; MS (EI)  $m/z$ : 254 ( $[\text{M}+\text{H}]^+$ ).

(2-aminophenyl)(4-fluorophenyl)methanone (**2f**)<sup>[7]</sup>

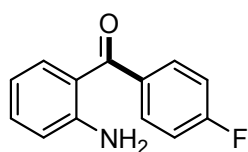

Yellow solid, 17.2 mg.  $^1\text{H}$  NMR (400 MHz,  $\text{CDCl}_3$ )  $\delta$  7.69-7.65 (m, 2H), 7.41 (dd,  $J = 1.2, 8.0$  Hz, 1H), 7.31-7.27 (m, 1H), 7.15-7.11 (m, 2H), 6.74 (d,  $J = 8.4$  Hz, 1H), 6.63-6.59 (m, 1H), 6.01 (br s, 2H);  $^{13}\text{C}$  NMR (125 MHz,  $\text{CDCl}_3$ )  $\delta$  197.5, 164.5 ( $J_{\text{CF}} = 250$  Hz), 150.8, 136.2, 134.2, 134.1, 131.6 ( $J_{\text{CF}} = 9$  Hz), 118.1, 117.1, 115.6, 115.2 ( $J_{\text{CF}} = 22$  Hz); MS (EI)  $m/z$ : 216 ( $[\text{M}+\text{H}]^+$ ).

(2-aminophenyl)(3-fluorophenyl)methanone (**2g**)<sup>[9]</sup>

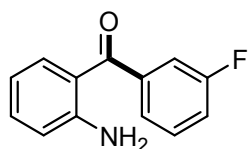

Yellow solid, 30.4 mg.  $^1\text{H}$  NMR (500 MHz,  $\text{CDCl}_3$ )  $\delta$  7.45-7.39 (m, 3H), 7.34-7.29 (m, 2H), 7.23-7.20 (m, 1H), 6.74 (d,  $J = 8.5$  Hz, 1H), 6.61 (t,  $J = 7.5$  Hz, 1H), 6.12 (br s, 2H);  $^{13}\text{C}$  NMR (125 MHz,  $\text{CDCl}_3$ )  $\delta$  197.4, 162.3 ( $J_{\text{CF}} = 246$  Hz), 151.1, 142.2 ( $J_{\text{CF}} = 6$  Hz), 134.5 ( $J_{\text{CF}} = 30$  Hz), 129.8, 129.7, 124.7 ( $J_{\text{CF}} = 3$  Hz), 117.9 ( $J_{\text{CF}} = 21$  Hz), 117.6, 117.1, 116.0 ( $J_{\text{CF}} = 22$  Hz), 115.6; MS (EI)  $m/z$ : 216 ( $[\text{M}+\text{H}]^+$ ).

(2-aminophenyl)(4-chlorophenyl)methanone (**2h**)<sup>[7]</sup>



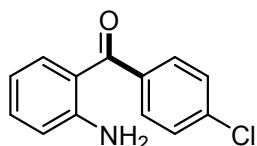

Yellow solid, 26.8 mg.  $^1\text{H}$  NMR (400 MHz,  $\text{CDCl}_3$ )  $\delta$  7.59-7.57 (m, 2H), 7.44-7.38 (m, 3H), 7.31-7.26 (m, 1H), 6.73 (d,  $J = 8.4$  Hz, 1H), 6.62-6.58 (m, 1H), 6.01 (br s, 2H);  $^{13}\text{C}$  NMR (125 MHz,  $\text{CDCl}_3$ )  $\delta$  197.6, 151.0, 138.4, 137.3, 134.4, 134.2, 130.6, 128.4, 117.8, 117.1, 115.6; MS (EI)  $m/z$ : 232 ( $[\text{M}+\text{H}]^+$ ).

(2-aminophenyl)(3-chlorophenyl)methanone (**2i**)<sup>[10]</sup>

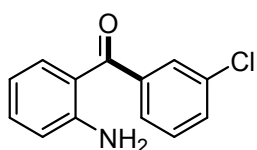

Yellow solid, 26.8 mg.  $^1\text{H}$  NMR (400 MHz,  $\text{CDCl}_3$ )  $\delta$  7.61-7.60 (m, 1H), 7.50-7.47 (m, 2H), 7.40-7.36 (m, 2H), 7.32-7.28 (m, 1H), 6.73 (dd,  $J = 8.4, 0.8$  Hz, 1H), 6.62-6.58 (m, 1H), 6.13 (br s, 2H);  $^{13}\text{C}$  NMR (125 MHz,  $\text{CDCl}_3$ )  $\delta$  197.3, 151.1, 141.8, 134.6, 134.3, 134.2, 130.9, 129.4, 128.9, 127.1, 117.5, 117.1, 115.6; MS (EI)  $m/z$ : 232 ( $[\text{M}+\text{H}]^+$ ).

(2-aminophenyl)(3-bromophenyl)methanone (**2j**)

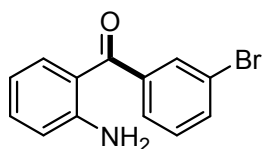

Yellow solid, 39.1 mg.  $^1\text{H}$  NMR (400 MHz,  $\text{CDCl}_3$ )  $\delta$  7.76 (s, 1H), 7.64 (d,  $J = 8.0$  Hz, 1H), 7.53 (d,  $J = 8.0$  Hz, 1H), 7.39 (dd,  $J_1 = 1.2$  Hz,  $J_2 = 8.4$  Hz, 1H), 7.34-7.28 (m, 2H), 6.73 (d,  $J = 8.0$  Hz, 1H), 6.63-6.59 (m, 1H), 6.12 (br s, 2H);  $^{13}\text{C}$  NMR (125 MHz,  $\text{CDCl}_3$ )  $\delta$  197.2, 151.1, 142.0, 134.6, 134.3, 133.8, 131.8, 129.6, 127.5, 122.3, 117.5, 117.1, 115.6; HRMS (ESI)  $m/z$ : Anal. Calcd.  $\text{C}_{13}\text{H}_{11}\text{BrNO}$   $[\text{M}+\text{H}]^+$  276.0018. Found 276.0017.

(2-aminophenyl)(3-(trifluoromethyl)phenyl)methanone (**2k**)<sup>[11]</sup>

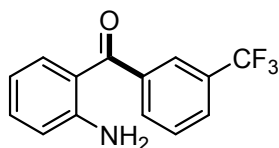

Yellow solid, 10.7 mg.  $^1\text{H}$  NMR (400 MHz,  $\text{CDCl}_3$ )  $\delta$  7.90 (s, 1H), 7.79 (t,  $J = 8.4$  Hz, 2H), 7.59 (t,  $J = 7.6$  Hz, 1H), 7.36-7.29 (m, 2H), 6.75 (d,  $J = 8.4$  Hz, 1H), 6.61 (t,  $J = 7.6$  Hz, 1H), 6.17 (br s, 2H);  $^{13}\text{C}$  NMR (125 MHz,  $\text{CDCl}_3$ )  $\delta$  197.3, 151.2, 140.8, 134.8, 134.2, 132.2, 130.8 ( $J_{\text{CF}} = 33$  HZ), 128.7, 127.5 ( $J_{\text{CF}} = 4$  HZ), 125.8 ( $J_{\text{CF}} = 4$  HZ), 123.8 ( $J_{\text{CF}} = 271$  HZ), 117.4, 117.2, 115.7; MS (EI)  $m/z$ : 266 ( $[\text{M}+\text{H}]^+$ ).

(2-aminophenyl)(3-methoxyphenyl)methanone (**2l**)<sup>[7]</sup>

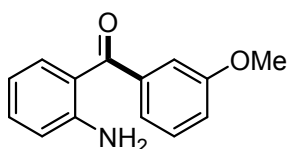

Yellow solid, 31.8 mg.  $^1\text{H}$  NMR (400 MHz,  $\text{CDCl}_3$ )  $\delta$  7.46 (dd,  $J = 8.0, 1.2$  Hz, 1H), 7.35 (t,  $J = 7.6$  Hz, 1H), 7.30-7.26 (m, 1H), 7.19-7.17 (m, 2H), 7.07-7.04 (m, 1H), 6.73 (d,  $J = 7.6$  Hz, 1H), 6.61-6.57 (m, 1H), 6.09 (br s, 2H), 3.84 (s, 3H);  $^{13}\text{C}$  NMR (125 MHz,  $\text{CDCl}_3$ )  $\delta$  198.8, 159.4, 150.9, 141.4, 134.5, 134.2, 129.0, 121.6, 118.1, 117.2, 116.9, 115.5, 113.8, 55.4; MS (EI)  $m/z$ : 228 ( $[\text{M}+\text{H}]^+$ ).

(2-aminophenyl)(4-methoxyphenyl)methanone (**2m**)<sup>[7]</sup>

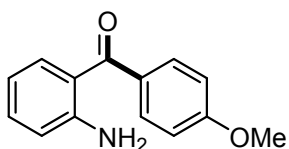

Yellow solid, 27.2 mg.  $^1\text{H}$  NMR (400 MHz,  $\text{CDCl}_3$ )  $\delta$  7.68 (d,  $J = 8.4$  Hz, 2H), 7.45 (d,  $J = 8.0$  Hz, 1H), 7.29-7.25 (m, 1H), 6.94 (d,  $J = 8.8$  Hz, 2H), 6.72 (d,  $J = 8.0$  Hz, 1H), 6.64-6.60 (m, 1H), 5.84 (br s, 2H), 3.87 (s, 3H);  $^{13}\text{C}$  NMR (125 MHz,  $\text{CDCl}_3$ )  $\delta$  197.7, 162.3, 150.3, 133.9, 133.6, 132.3, 131.7, 119.0, 116.9, 115.5, 113.3, 55.4; MS (EI)  $m/z$ : 228 ( $[\text{M}+\text{H}]^+$ ).

[1,1'-biphenyl]-3-yl(2-aminophenyl)methanone (**2n**)<sup>[9]</sup>

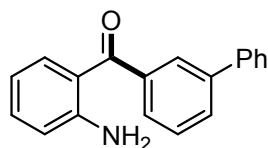

Yellow solid, 34.4 mg.  $^1\text{H}$  NMR (500 MHz,  $\text{CDCl}_3$ )  $\delta$  7.85 (s, 1H), 7.74 (d,  $J = 7.5$  Hz, 1H), 7.61-7.59 (m, 3H), 7.53-7.49 (m, 2H), 7.44 (t,  $J = 7.5$  Hz, 2H), 7.36 (t,  $J = 7.5$  Hz, 1H), 7.30-7.27 (m, 1H), 6.73 (d,  $J = 8.5$  Hz, 1H), 6.61-6.58 (m, 1H), 6.13 (br s, 2H);  $^{13}\text{C}$  NMR (125 MHz,  $\text{CDCl}_3$ )  $\delta$  199.0, 151.0, 141.1, 140.7, 140.3, 134.6, 134.3, 129.6, 128.8, 128.5, 127.9, 127.7, 127.6, 127.2, 118.1, 117.0, 115.6; MS (EI)  $m/z$ : 274 ( $[\text{M}+\text{H}]^+$ ).

(2-aminophenyl)(naphthalen-2-yl)methanone (**2o**)<sup>[7]</sup>

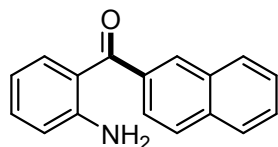

Yellow solid, 28.4 mg.  $^1\text{H}$  NMR (500 MHz,  $\text{CDCl}_3$ )  $\delta$  8.11 (s, 1H), 7.92-7.88 (m, 3H), 7.78-7.76 (m, 1H), 7.59-7.50 (m, 3H), 7.32-7.29 (m, 1H), 6.76 (d,  $J = 8.5$  Hz, 1H), 6.63-6.60 (m, 1H), 6.09 (br s, 2H);  $^{13}\text{C}$  NMR (125 MHz,  $\text{CDCl}_3$ )  $\delta$  198.9, 150.9, 137.3, 134.6, 134.2, 132.3, 130.0, 129.0, 128.0, 127.7, 127.6, 126.6, 125.7, 118.5, 117.0, 115.6; MS (EI)  $m/z$ : 248 ( $[\text{M}+\text{H}]^+$ ).

(2-aminophenyl)(thiophen-2-yl)methanone (**2p**)<sup>[12]</sup>

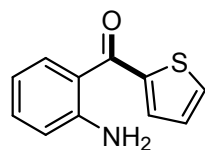

Yellow solid, 22.2 mg.  $^1\text{H}$  NMR (400 MHz,  $\text{CDCl}_3$ )  $\delta$  7.77 (dd,  $J = 1.2, 8.0$  Hz, 1H), 7.65 (dd,  $J = 1.2, 4.8$  Hz, 1H), 7.57 (dd,  $J = 1.2, 4.0$  Hz, 1H), 7.30 (m, 1H), 7.13 (m, 1H), 6.74-6.67 (m, 2H), 5.71 (br s, 2H);  $^{13}\text{C}$  NMR (125 MHz,  $\text{CDCl}_3$ )  $\delta$  189.4, 149.9, 144.8, 133.8, 133.6, 132.7, 127.5, 119.1, 117.0, 115.9; MS (EI)  $m/z$ : 204 ( $[\text{M}+\text{H}]^+$ ).

(2-amino-5-(benzyloxy)phenyl)(phenyl)methanone (**2q**)<sup>[13]</sup>

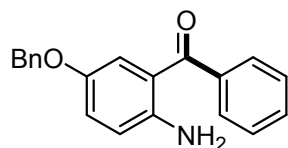

Yellow solid, 43.0 mg.  $^1\text{H}$  NMR (400 MHz,  $\text{CDCl}_3$ )  $\delta$  7.58-7.56 (m, 2H), 7.52-7.49 (m, 1H), 7.42-7.39 (m, 2H), 7.35-7.29 (m, 5H), 7.05 (dd,  $J = 2.8, 8.8$  Hz, 1H), 7.00 (d,  $J = 2.8$  Hz, 1H), 6.69 (d,  $J = 9.2$  Hz, 1H), 5.75 (br s, 2H), 4.89 (s, 2H);  $^{13}\text{C}$  NMR (125 MHz,  $\text{CDCl}_3$ )  $\delta$  198.4, 148.7, 145.6, 139.8, 137.0, 131.1, 129.1, 128.5, 128.1, 127.9, 127.4, 124.0, 118.8, 118.4, 118.2, 71.0; MS (EI)  $m/z$ : 304 ( $[\text{M}+\text{H}]^+$ ).

(3-amino-[1,1'-biphenyl]-4-yl)(phenyl)methanone (**2r**)

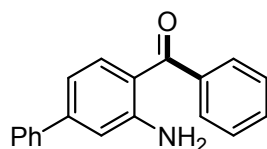

Yellow solid, 35.6 mg.  $^1\text{H}$  NMR (500 MHz,  $\text{CDCl}_3$ )  $\delta$  7.68-7.66 (m, 2H), 7.60 (d,  $J = 7.0$  Hz, 2H), 7.55-7.52 (m, 2H), 7.49-7.43 (m, 4H), 7.40-7.37 (m, 1H), 6.94 (d,  $J = 1.5$  Hz, 1H), 6.84 (dd,  $J = 1.5, 8.5$  Hz, 1H), 6.21 (br s, 2H);  $^{13}\text{C}$  NMR (125 MHz,  $\text{CDCl}_3$ )  $\delta$  198.7, 151.3, 146.9, 140.2, 140.1, 135.2, 131.0, 129.0, 128.8, 128.2, 128.1, 127.2, 117.2, 115.2, 114.8; MS (ESI)  $m/z$ : Anal. Calcd.  $\text{C}_{19}\text{H}_{16}\text{NO}$   $[\text{M}+\text{H}]^+$  274.1226. Found 274.1227.

(2-amino-6-methylphenyl)(phenyl)methanone (**2s**)<sup>[14]</sup>

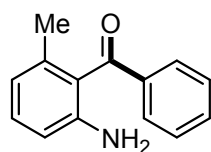

Yellow solid, 10.1 mg.  $^1\text{H}$  NMR (400 MHz,  $\text{CDCl}_3$ )  $\delta$  7.84-7.82 (m, 2H), 7.58 (t,  $J = 7.6$  Hz, 1H), 7.45 (t,  $J = 7.6$  Hz, 2H), 7.13 (t,  $J = 7.6$  Hz, 1H), 6.61 (t,  $J = 7.6$  Hz, H), 3.91 (br s, 2H), 2.01 (s, 3H);  $^{13}\text{C}$  NMR (125 MHz,  $\text{CDCl}_3$ )  $\delta$  200.0, 144.7, 138.1, 136.4, 133.5, 130.4, 129.4, 128.8, 125.1, 120.4, 114.0, 20.5; MS (EI)  $m/z$ : 212 ( $[\text{M}+\text{H}]^+$ ).

(2-amino-5-methylphenyl)(phenyl)methanone (**2t**)<sup>[15]</sup>

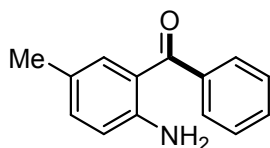

Yellow solid, 28.7 mg.  $^1\text{H}$  NMR (500 MHz,  $\text{CDCl}_3$ )  $\delta$  7.64-7.63 (m, 2H), 7.54-7.51 (m, 1H), 7.47-7.44 (m, 2H), 7.22 (s, 1H), 7.12 (dd,  $J = 1.5, 8.5$  Hz, 1H), 6.67 (d,  $J = 8.5$  Hz, 1H), 5.91 (br s, 2H), 2.17 (s, 3H);  $^{13}\text{C}$  NMR (125 MHz,  $\text{CDCl}_3$ )  $\delta$  199.0, 148.7, 140.2, 135.3, 134.0, 131.0, 129.1, 128.0, 124.6, 118.3, 117.1, 20.3; MS (EI)  $m/z$ : 212 ( $[\text{M}+\text{H}]^+$ ).

(2-amino-5-fluorophenyl)(phenyl)methanone (**2u**)<sup>[16]</sup>

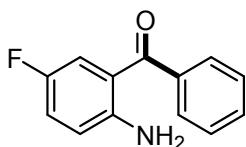

Yellow solid, 25.8 mg.  $^1\text{H}$  NMR (400 MHz,  $\text{CDCl}_3$ )  $\delta$  7.65-7.63 (m, 2H), 7.56-7.52 (m, 1H), 7.48-7.45 (m, 2H), 7.14 (dd,  $J = 9.6, 2.8$  Hz, 1H), 7.09-7.04 (m, 1H), 6.69 (dd,  $J = 4.4, 8.8$  Hz, 1H), 5.90 (br s, 2H);  $^{13}\text{C}$  NMR (125 MHz,  $\text{CDCl}_3$ )  $\delta$  198.0, 153.2 ( $J_{\text{CF}} = 233$  Hz), 147.3, 139.4, 131.4, 129.0, 128.2, 122.1 ( $J_{\text{CF}} = 23$  Hz), 118.9 ( $J_{\text{CF}} = 22$  Hz), 118.2 ( $J_{\text{CF}} = 7$  Hz), 117.8 ( $J_{\text{CF}} = 5$  Hz). MS (EI)  $m/z$ : 216 ( $[\text{M}+\text{H}]^+$ ).

(2-amino-5-chlorophenyl)(phenyl)methanone (**2v**)<sup>[7]</sup>

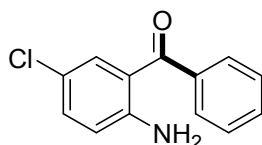

Yellow solid, 27.0 mg.  $^1\text{H}$  NMR (400 MHz,  $\text{CDCl}_3$ )  $\delta$  7.61-7.59 (m, 2H), 7.55-7.51 (m, 1H), 7.47-7.44 (m, 2H), 7.38 (d,  $J = 12$  Hz, 1H), 6.74 (d,  $J = 2.0$  Hz, 1H), 6.56 (dd,  $J = 2.0, 8.4$  Hz, 1H), 6.18 (br s, 2H);  $^{13}\text{C}$  NMR (125 MHz,  $\text{CDCl}_3$ )  $\delta$  198.3, 151.7, 140.3, 139.8, 135.8, 131.2, 129.0, 128.2, 116.6, 116.2, 116.0; MS (EI)  $m/z$ : 232 ( $[\text{M}+\text{H}]^+$ ).

2-hydroxy-2-phenylindolin-3-one (**3**)<sup>[17]</sup>

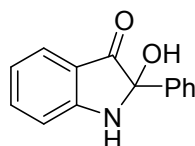

Yellow solid, 15.8 mg.  $^1\text{H}$  NMR (400 MHz, DMSO)  $\delta$  10.39 (s, 1H), 7.33-7.23 (m, 6H), 7.10 (d,  $J = 7.2$  Hz, 1H), 6.96 (t,  $J = 7.2$  Hz, 1H), 6.90 (d,  $J = 7.6$  Hz, 1H), 6.61 (s, 1H);  $^{13}\text{C}$  NMR (125 MHz, DMSO)  $\delta$  178.3, 141.8, 141.4, 133.6, 129.1, 127.9, 127.2, 125.3, 124.6, 121.9, 109.7, 77.2; MS (EI)  $m/z$ : 209 ( $[\text{M}-\text{OH}+\text{H}]^+$ ).

## VII. References

- [1] S. Yang, C. Sun, Z. Fang, B. Li, Y. Li, Z. Shi, *Angew. Chem. Int. Ed.* **2008**, *47*, 1473.
- [2] (a) R. L. Shriner, W. C. Ashley, E. Welch, *Org. Synth., Coll. Vol. 3* **1955**, 725. (b) J. Slätt, J. Bergman, *Tetrahedron* **2002**, *58*, 9187.
- [3] M. T. Herrero, J. D. de Sarralde, R. SanMartin, L. Bravo, E. Domínguez, *Adv. Synth. Catal.* **2012**, *354*, 3054.
- [4] K. Okuma, J. Seto, K. Sakaguchi, S. Ozaki, N. Nagahora, K. Shioji, *Tetrahedron Lett.* **2009**, *50*, 2943.
- [5] L. I. Dixon, M. A. Carroll, T. J. Gregson, G. J. Ellames, R. W. Harrington., W. Clegg, *Org. Biomol. Chem.* **2013**, *11*, 5877.
- [6] B. Zhao, X. Lu, *Tetrahedron Lett.* **2006**, *47*, 6765.
- [7] J. Chen, L. Ye, W. Su, *Org. Biomol. Chem.* **2014**, *12*, 8204.
- [8] J. R. Goodell, F. Puig-Basagoiti, B. M. Forshey, P.-Y. Shi, D. M. Ferguson, *J. Med. Chem.* **2006**, *49*, 2127.
- [9] M. H. Bolli, J. Marfurt, C. Grisostomi, C. Boss, C. Binkert, P. Hess, A. Treiber, E. Thorin, K. Morrison, S. Buchmann, D. Bur, H. Ramuz, M. Clozel, W. Fischli, T. Weller, *J. Med. Chem.* **2004**, *47*, 2776.
- [10] K. Yoon, S. M. Ha, K. Kim, *J. Org. Chem.* **2005**, *70*, 5741.
- [11] M. C. Carter, D. G. Alber, R. C. Baxter, S. K. Bithell, J. Budworth, A. Chubb, G.

- S. Cockerill, V. C. L. Dowdell, E. A. Henderson, S. J. Keegan, R. D. Kelsey, M. J. Lockyer, J. N. Stables, L. J. Wilson, K. L. Powell, *J. Med. Chem.* **2006**, *49*, 2311.
- [12] D. Susanti, L. L. R. Ng, P. W. H. Chan, *Adv. Synth. Catal.* **2014**, *356*, 353.
- [13] L. Ren, T. Lei, J.-X. Ye, L.-Z. Gong, *Angew. Chem. Int. Ed.* **2014**, *53*, 6027.
- [14] M.S. Syamala, B.Nageswer Rao, V. Ramamurthy, *Tetrahedron* **1988**, *44*, 7234.
- [15] J. Zhang, Y. Chen, X. Chen, X. Zheng, W. Cao, J. Chen, M. Zhang, *Tetrahedron* **2014**, *70*, 5820.
- [16] P. Cheng, Q. Zhang, Y.-B. Ma, Z.-Y. Jiang, X.-M. Zhang, F.-X. Zhang, J.-J. Chen, *Bio. Med. Chem. Lett.* **2008**, *18*, 3787.
- [17] R. J. Richmond, A. Hassner, *J. Org. Chem.* **1968**, *33*, 2548.

## VIII. Copies of $^1\text{H}$ and $^{13}\text{C}$ NMR Spectra

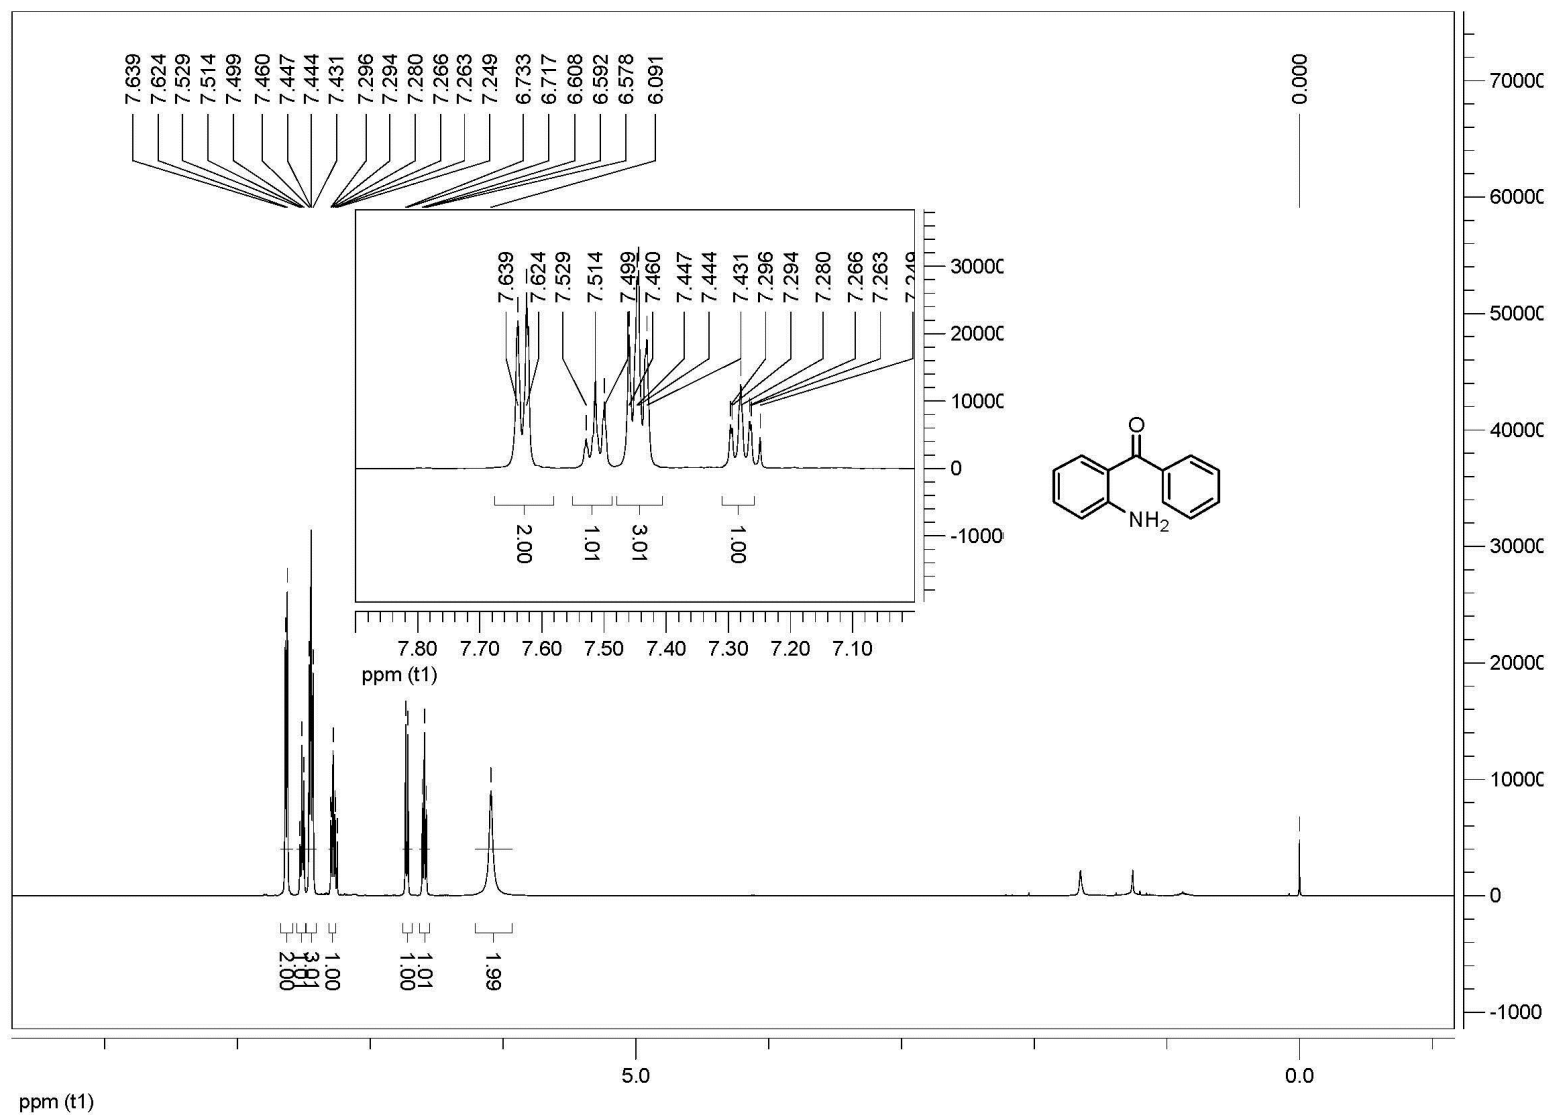



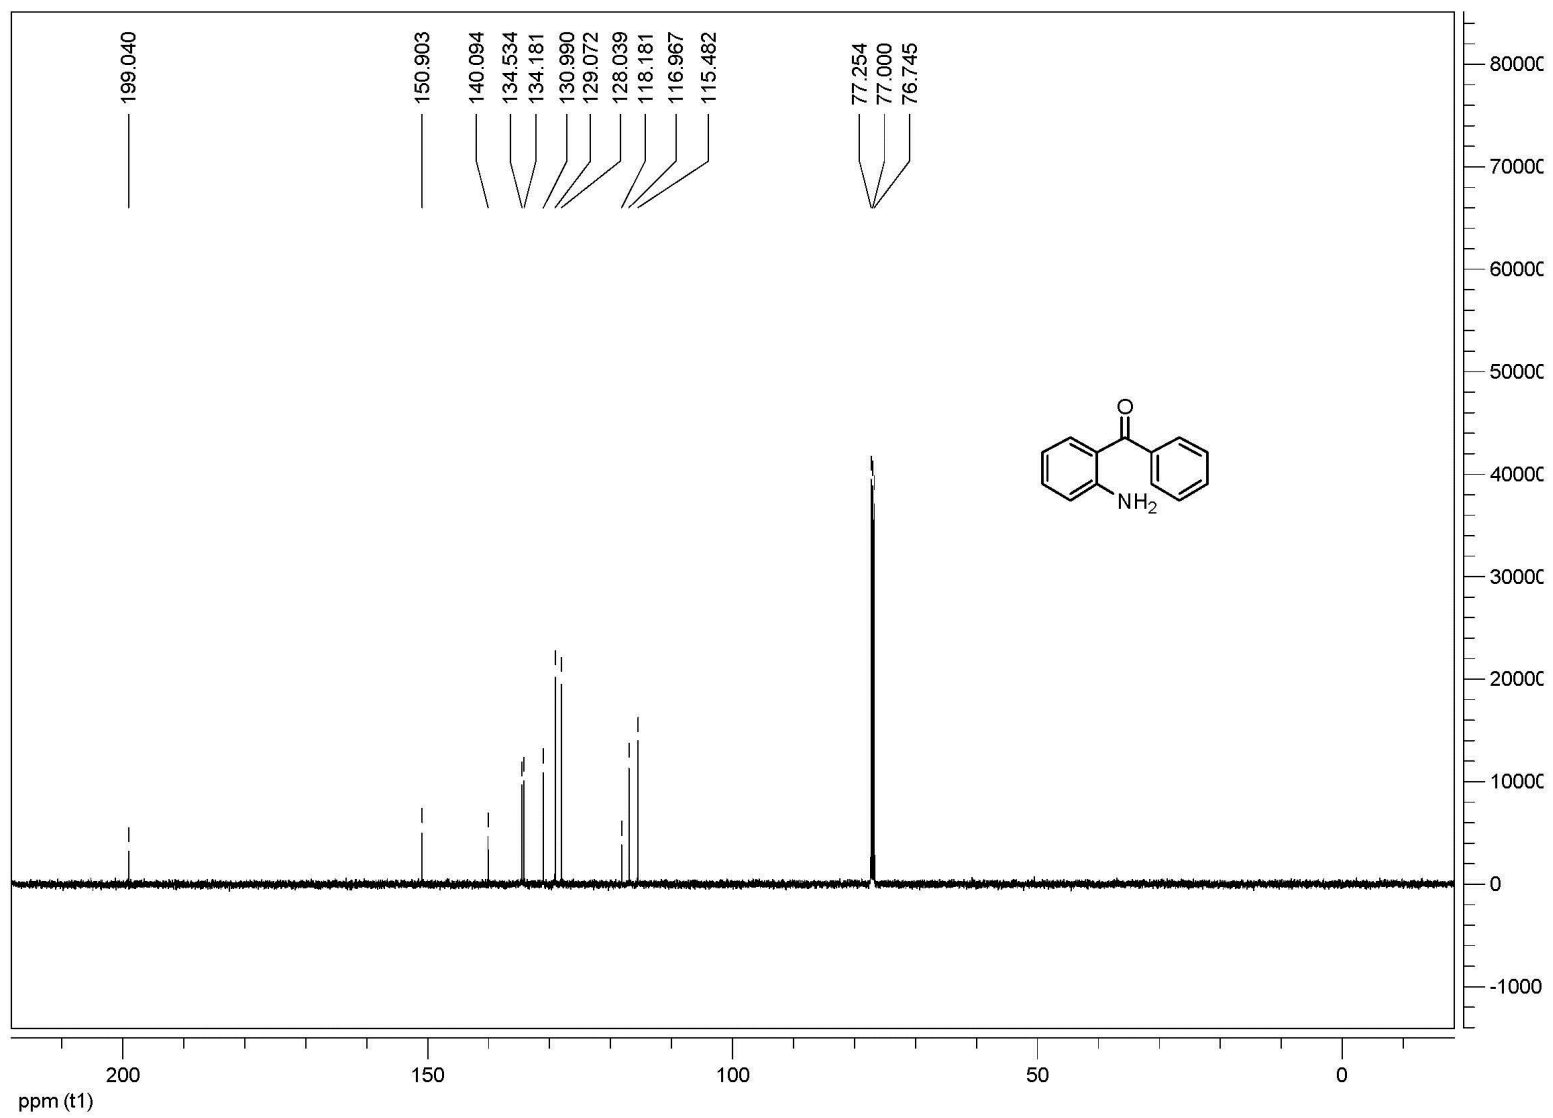

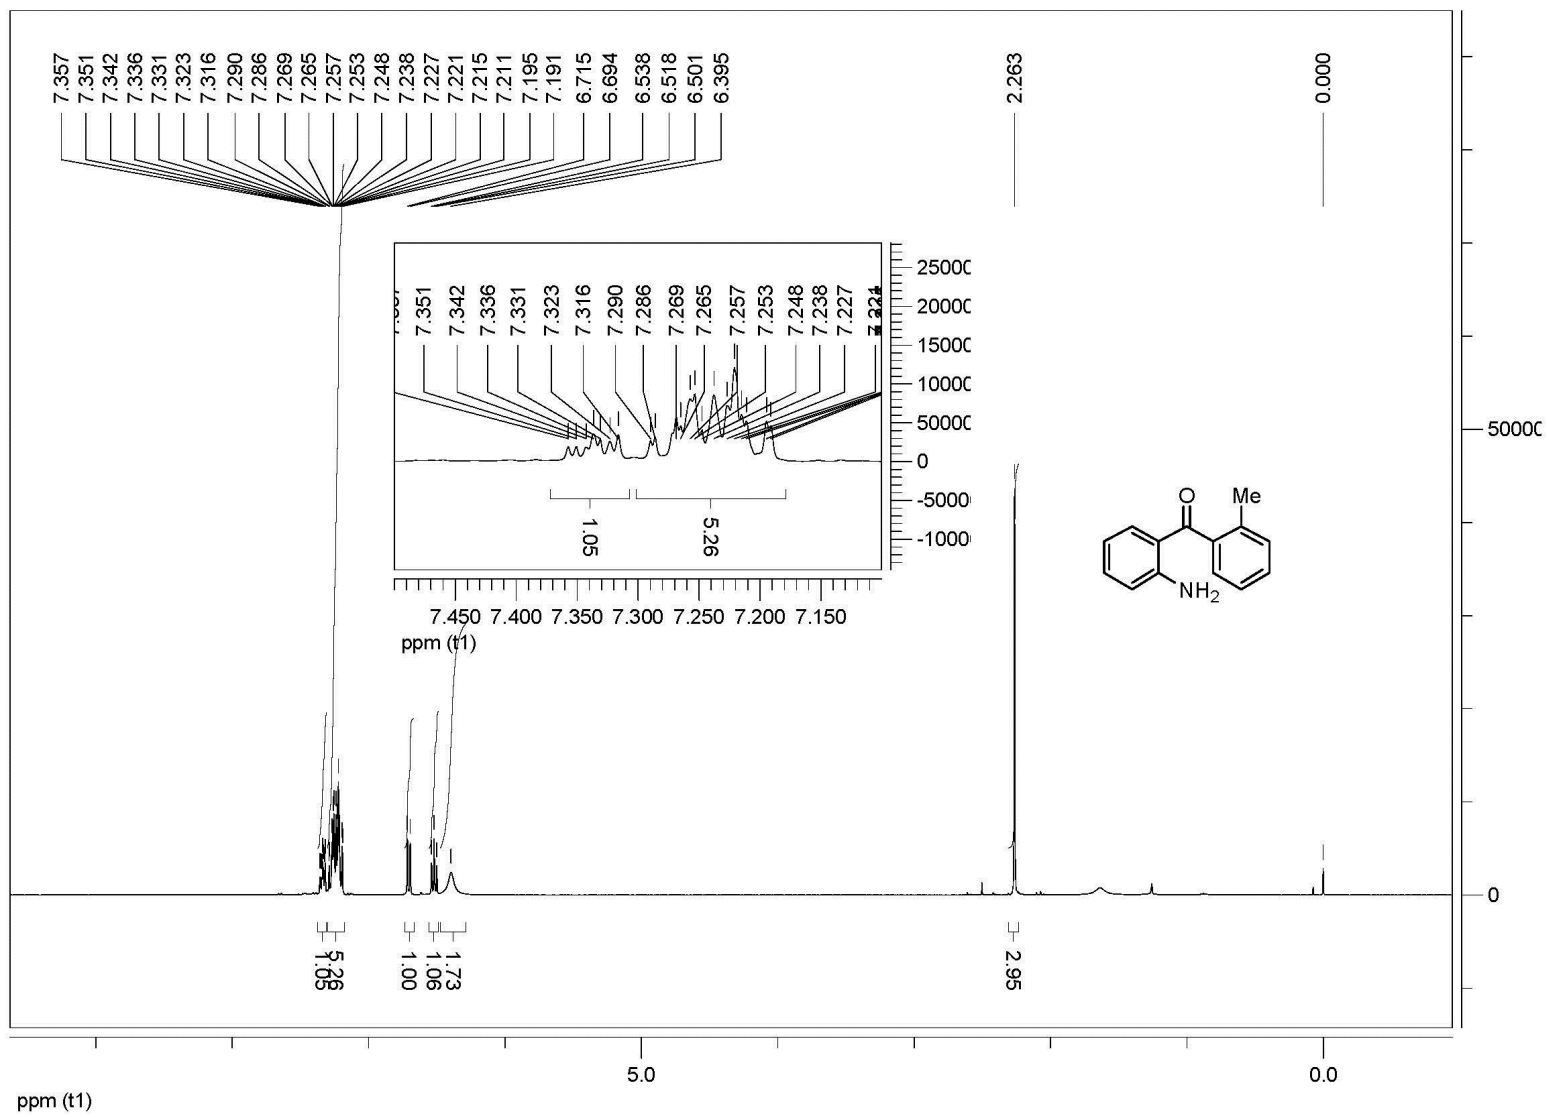

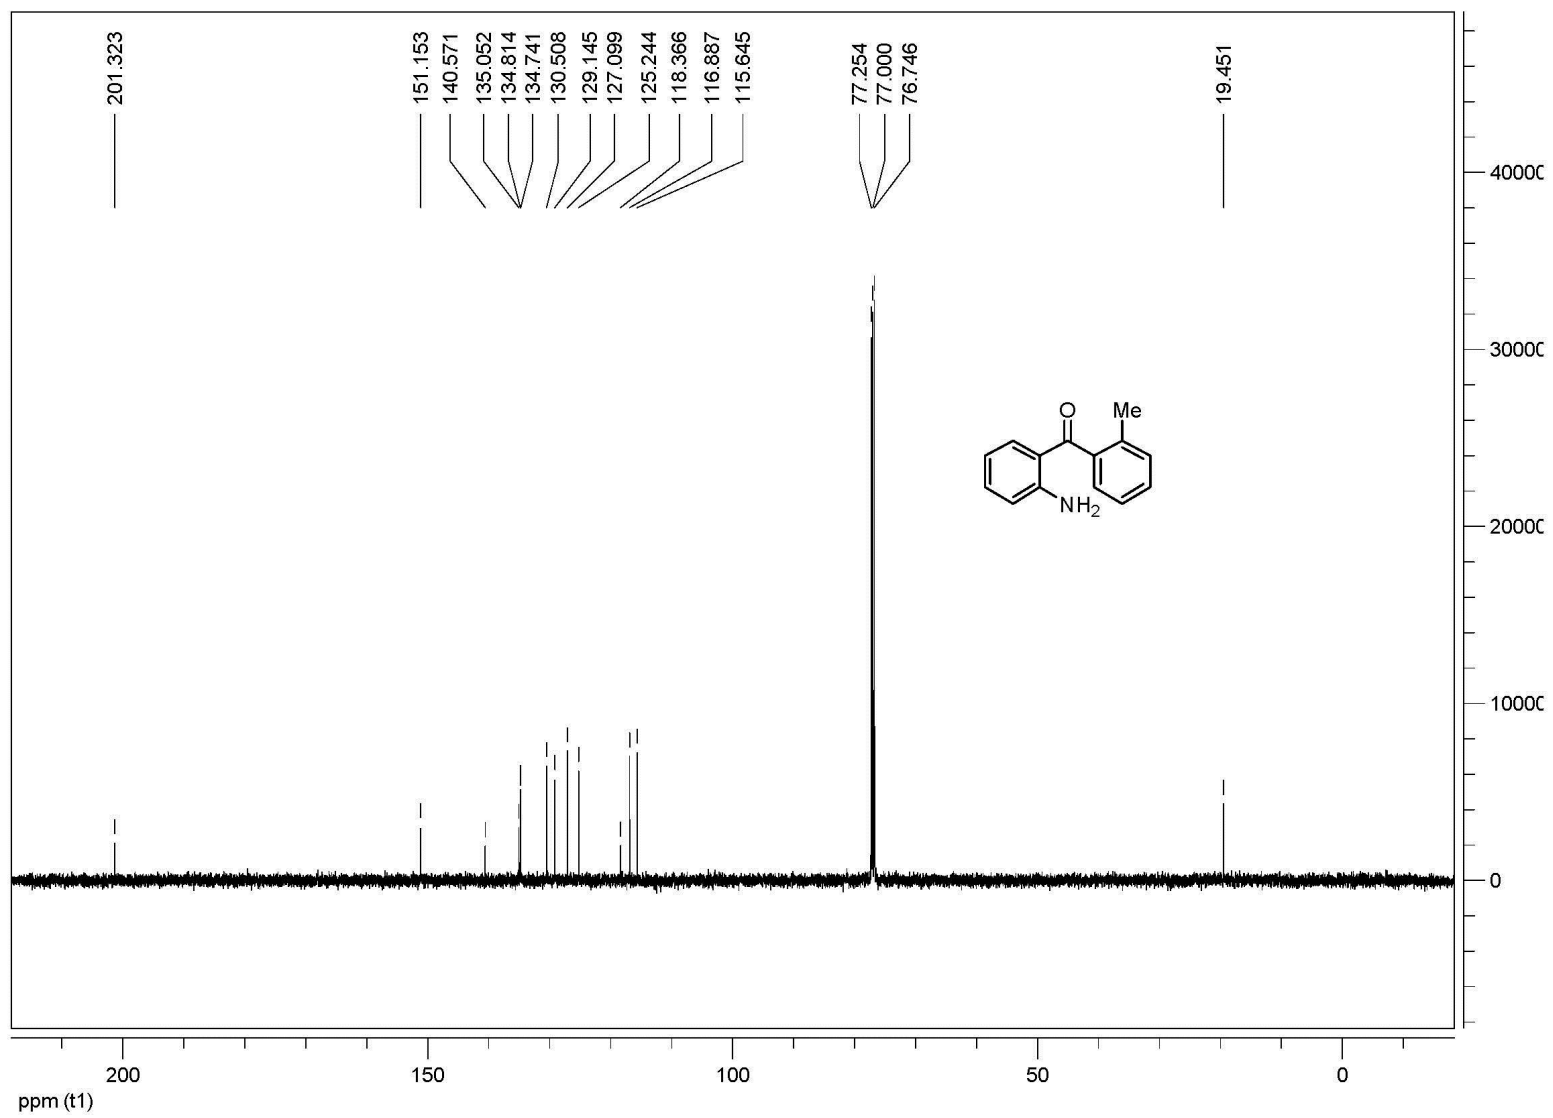

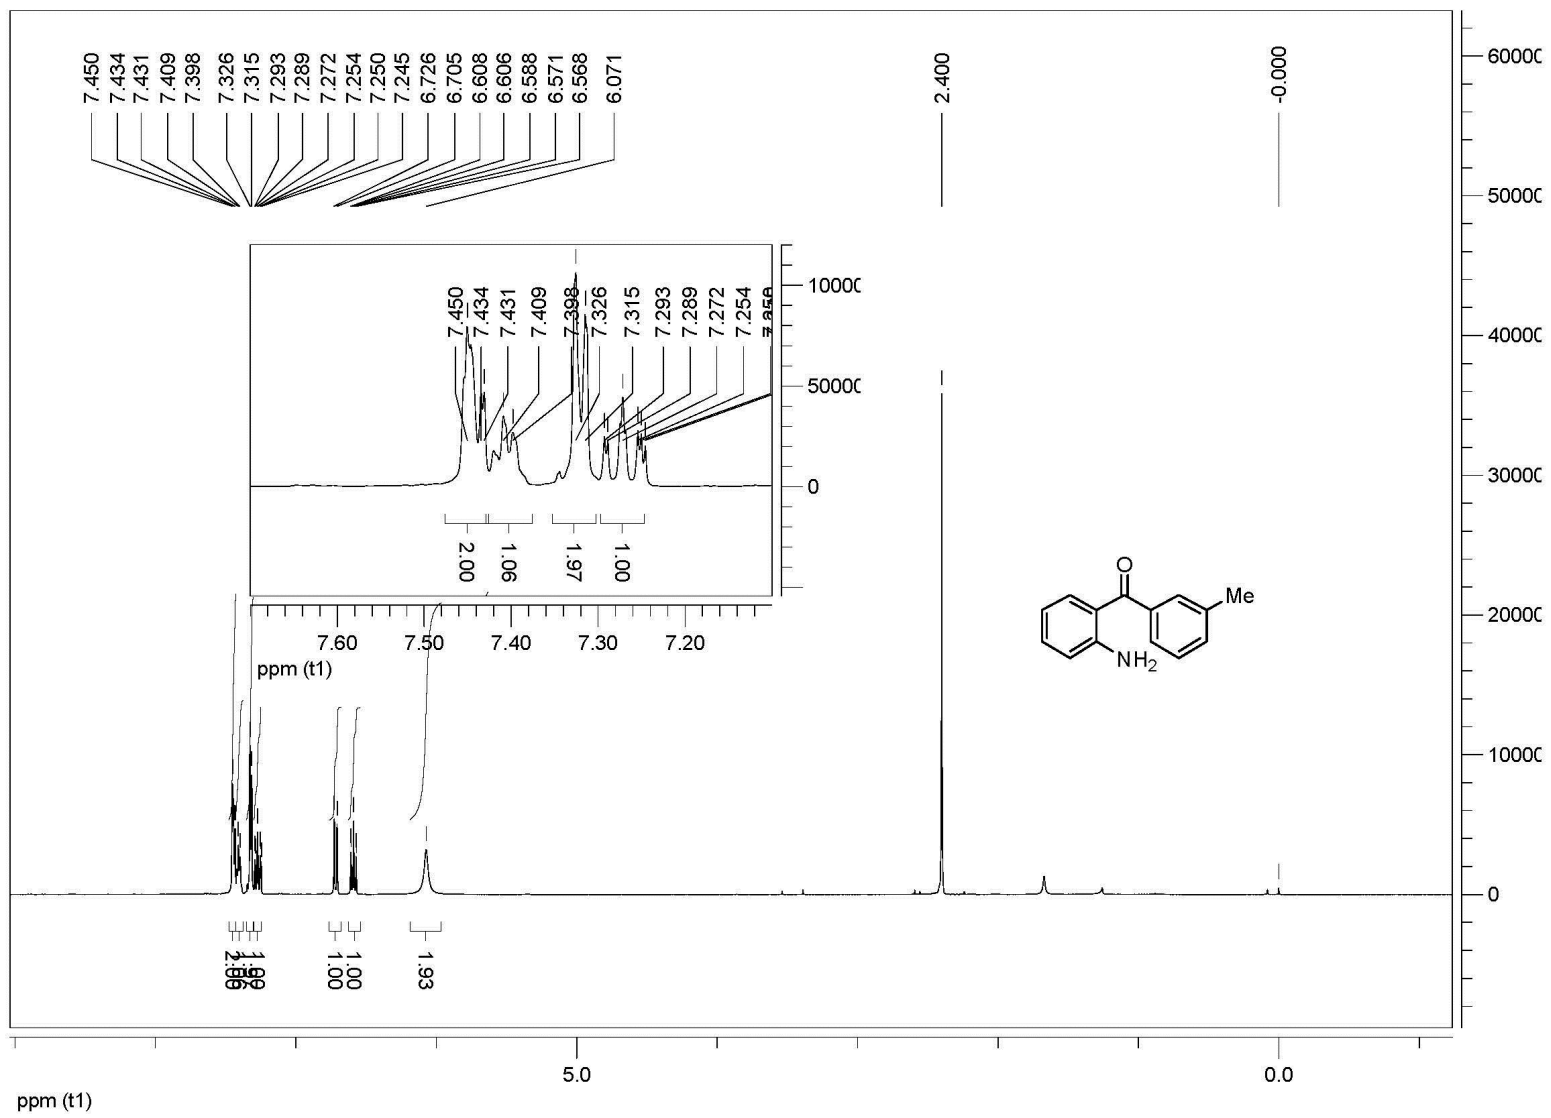

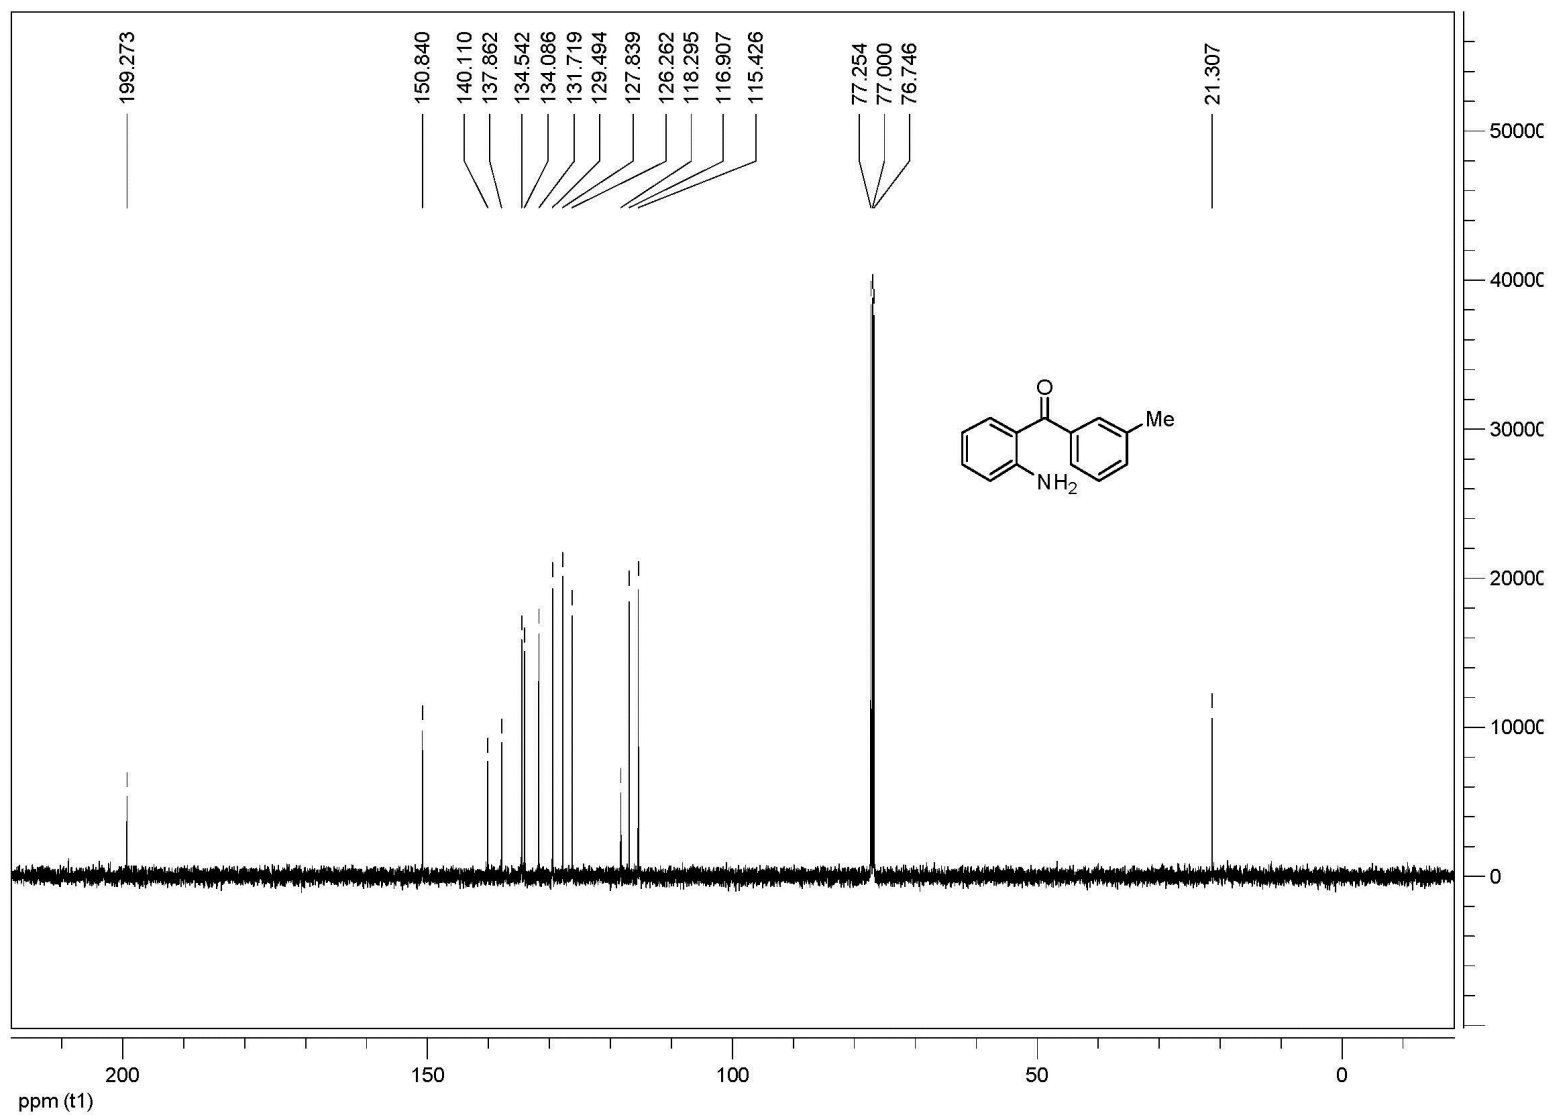

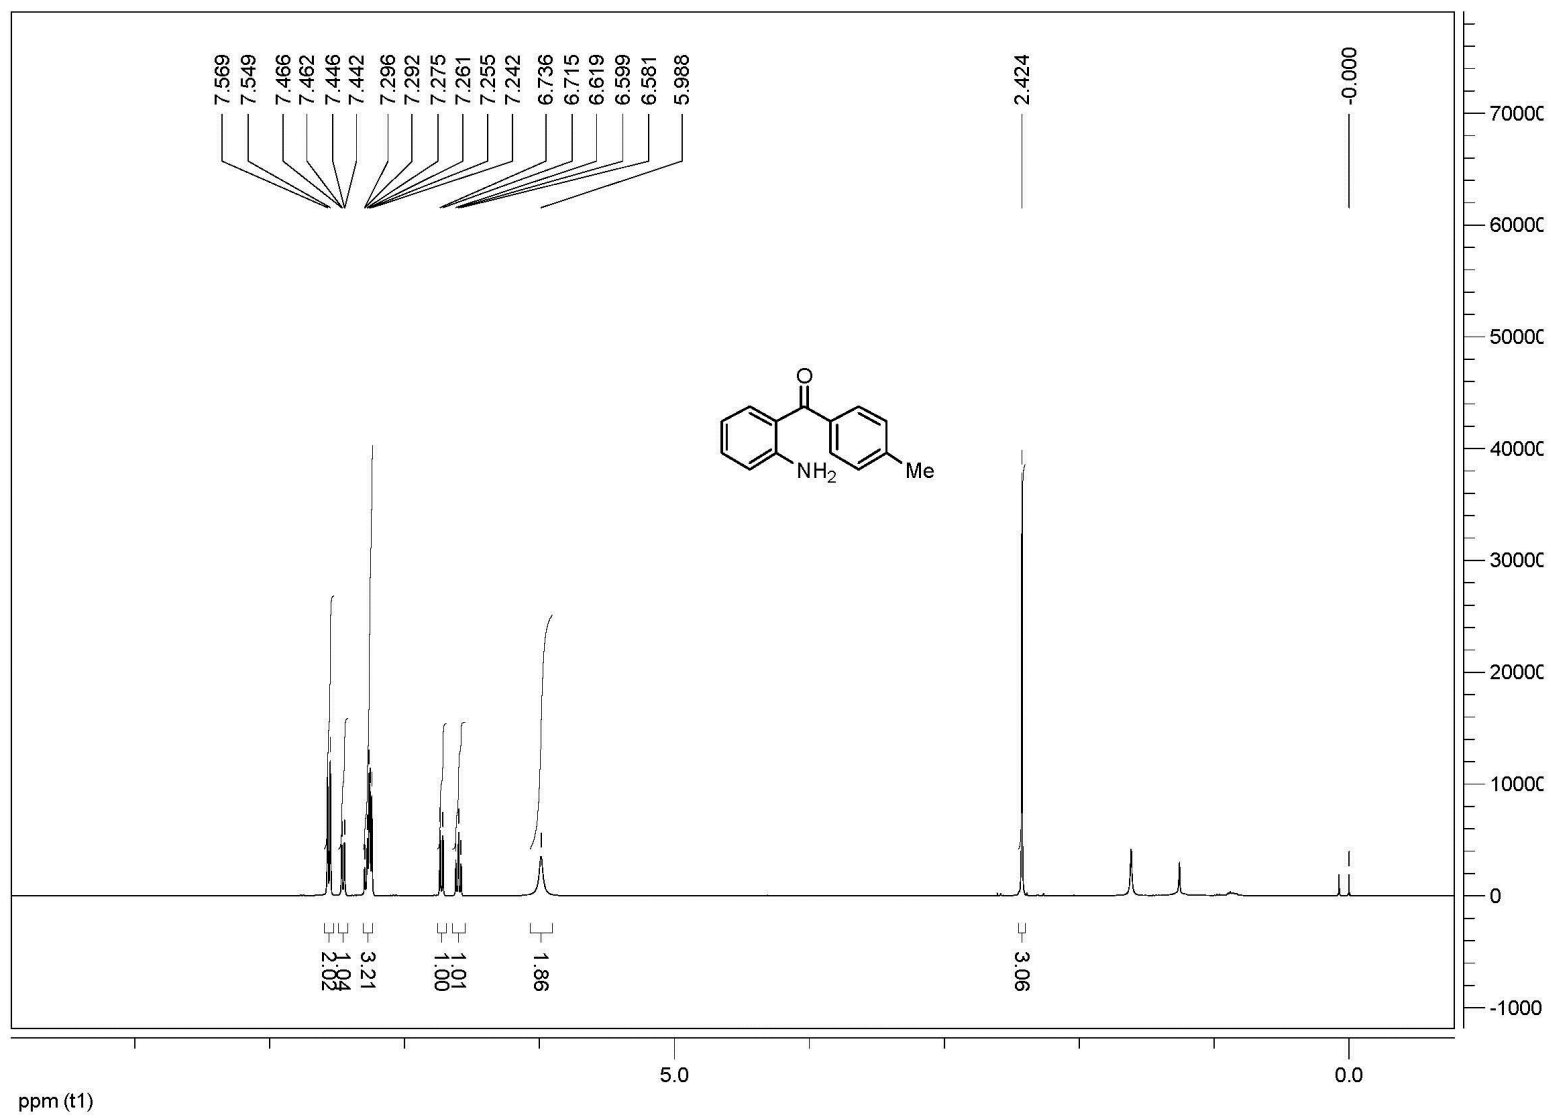

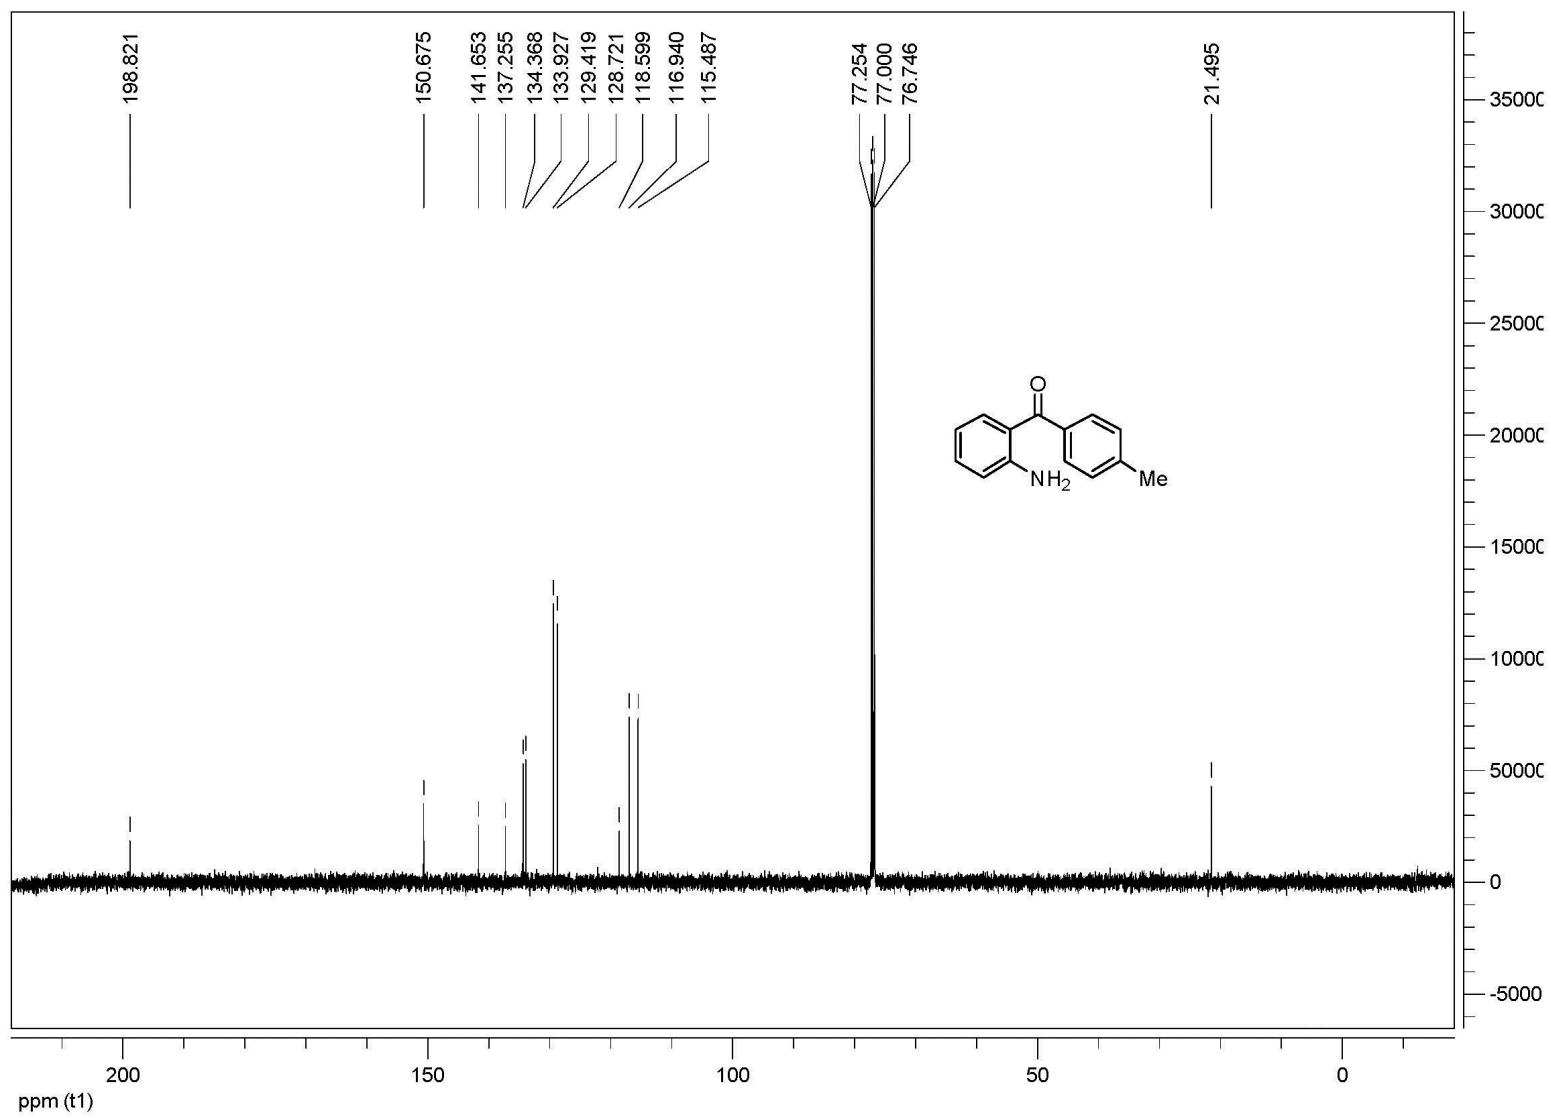

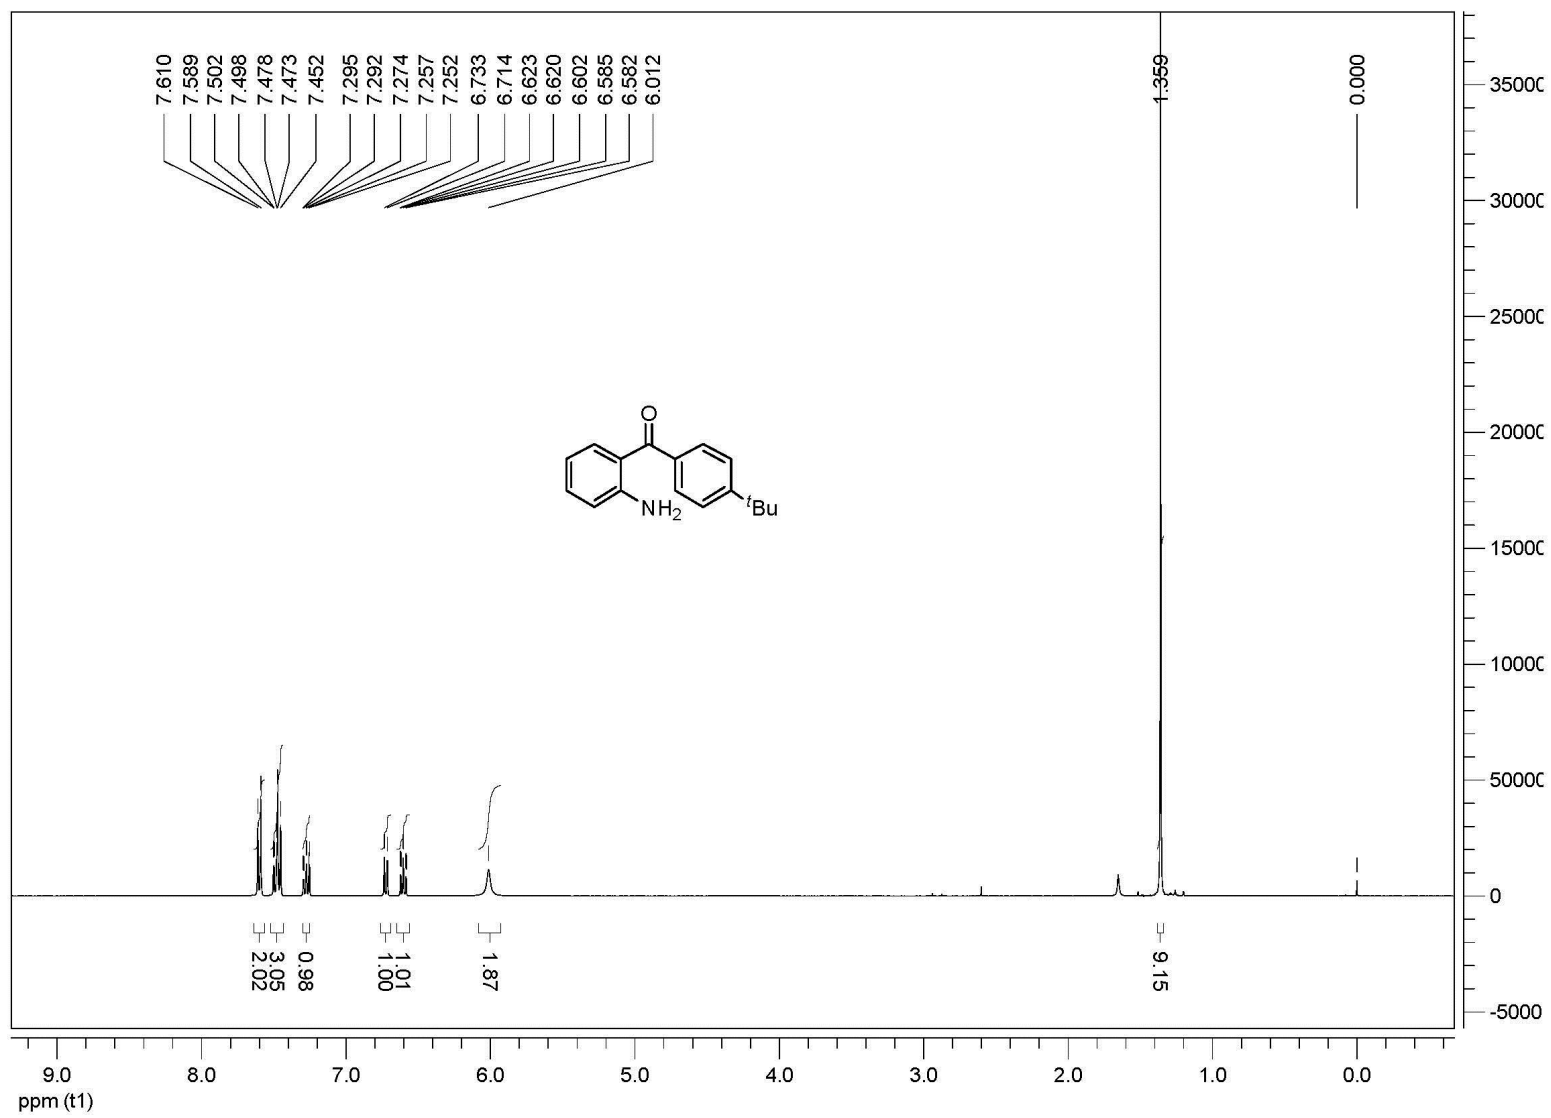



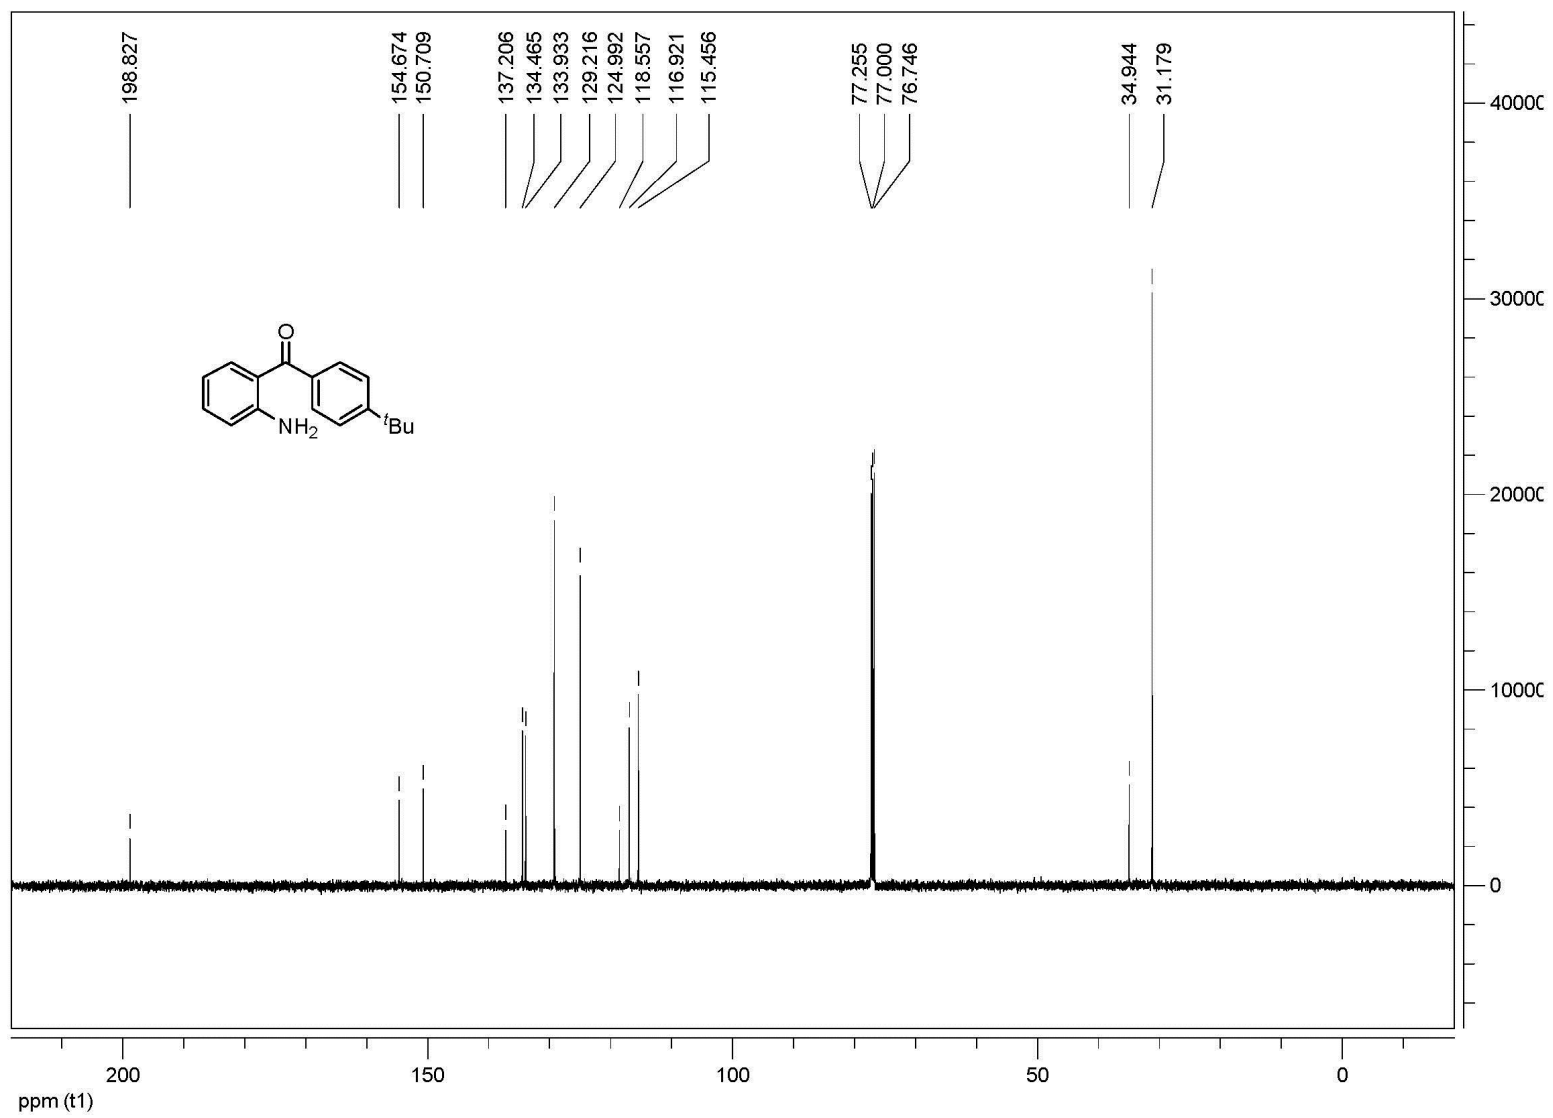

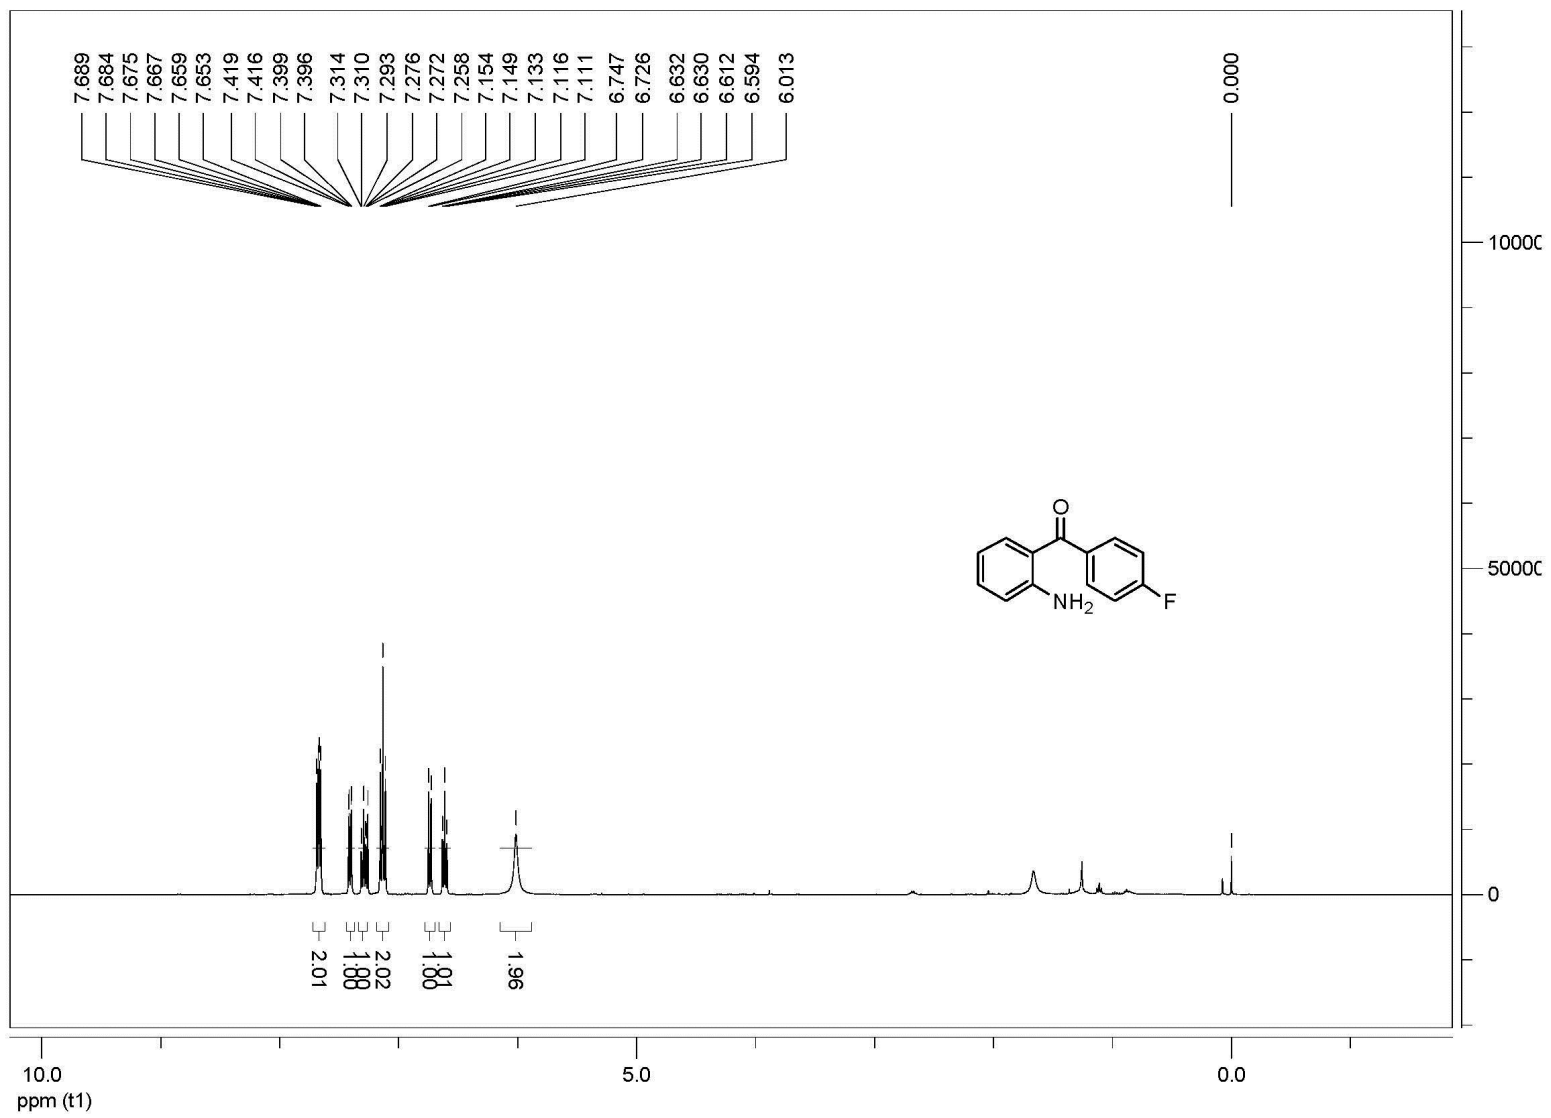

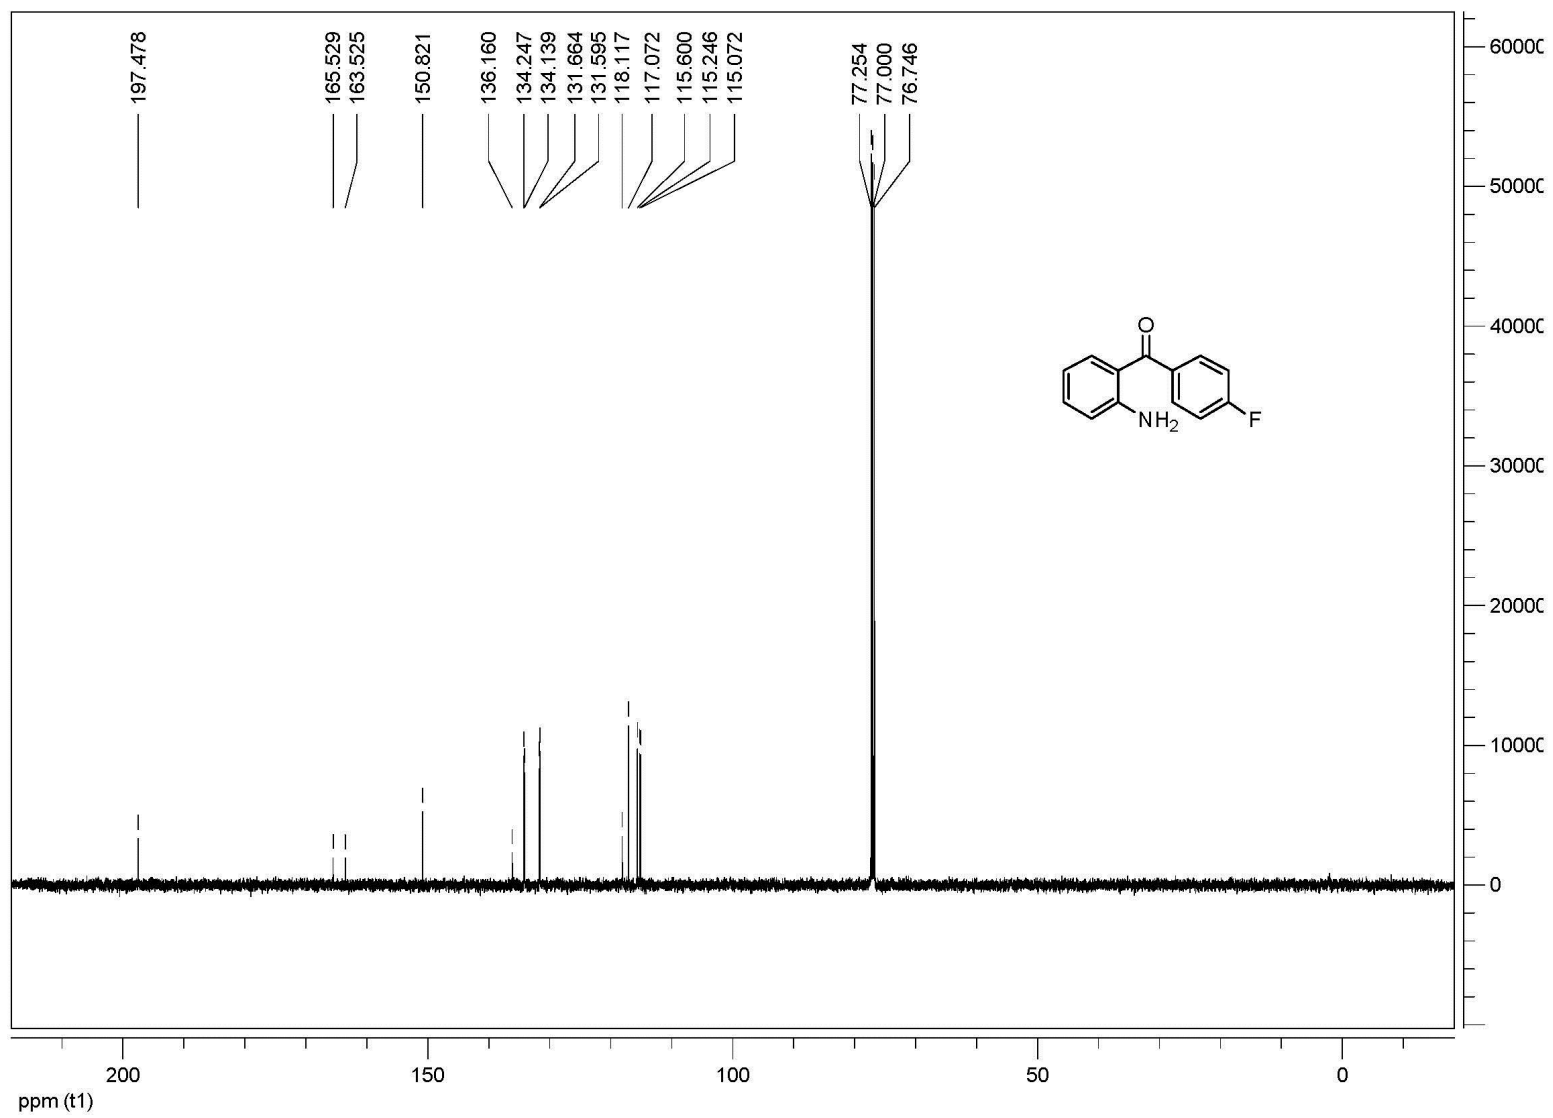

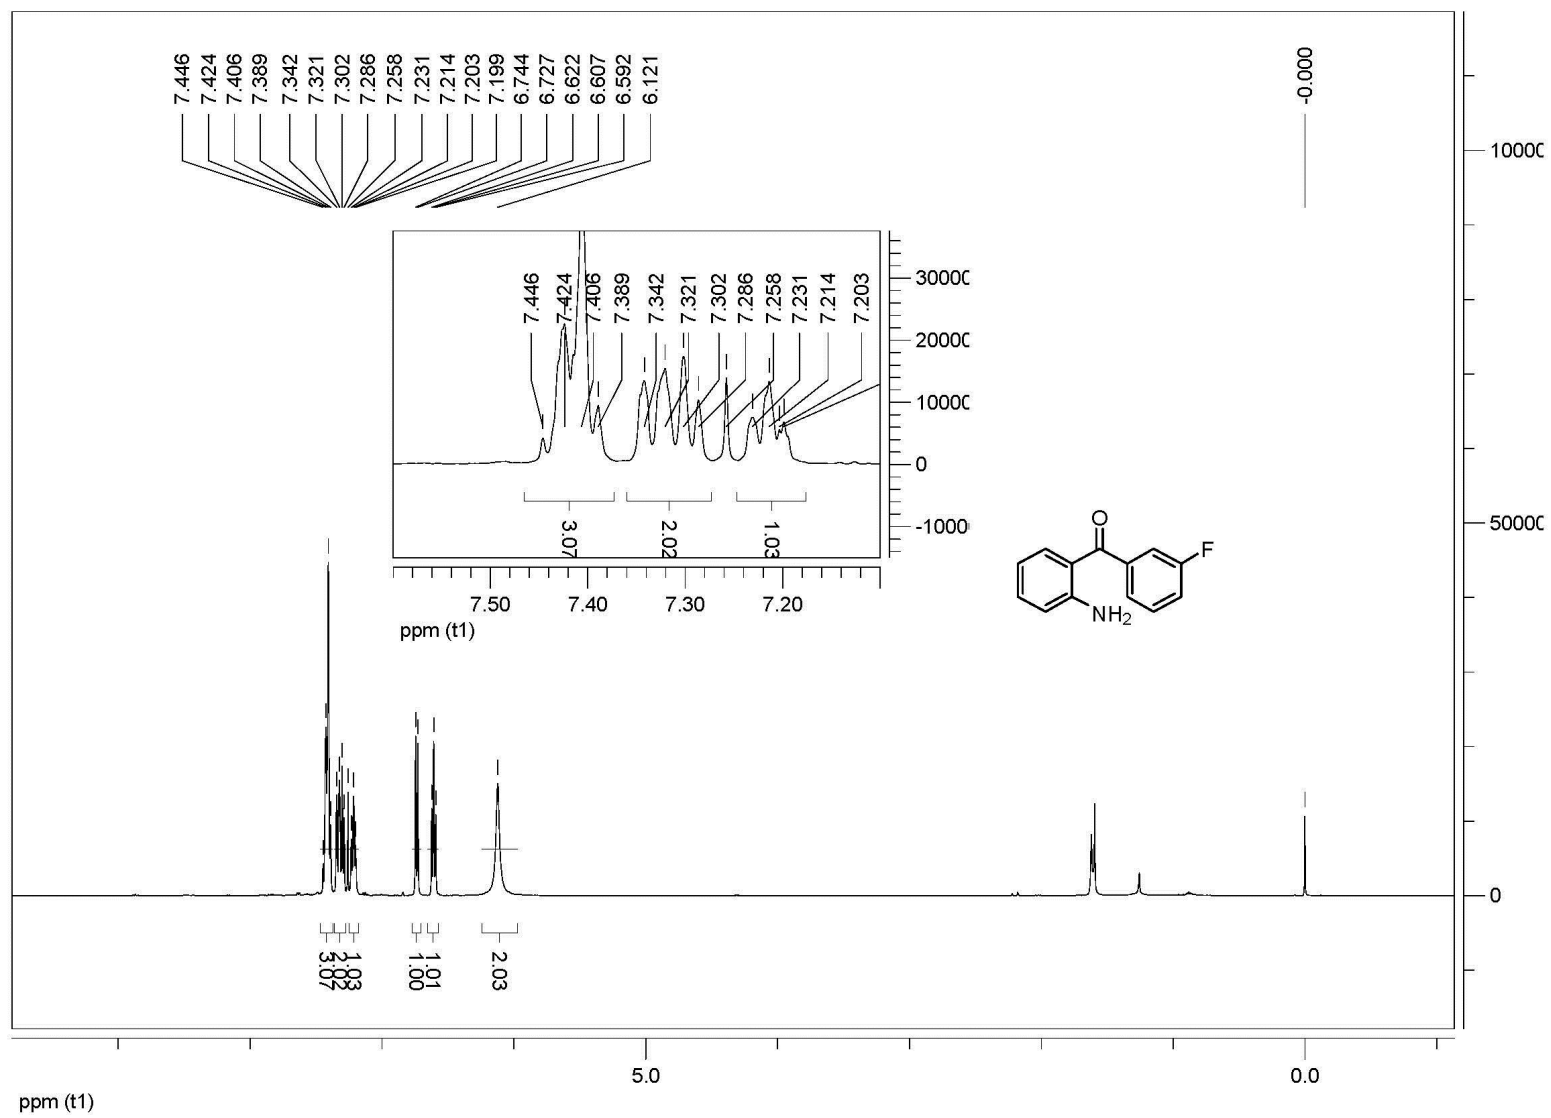

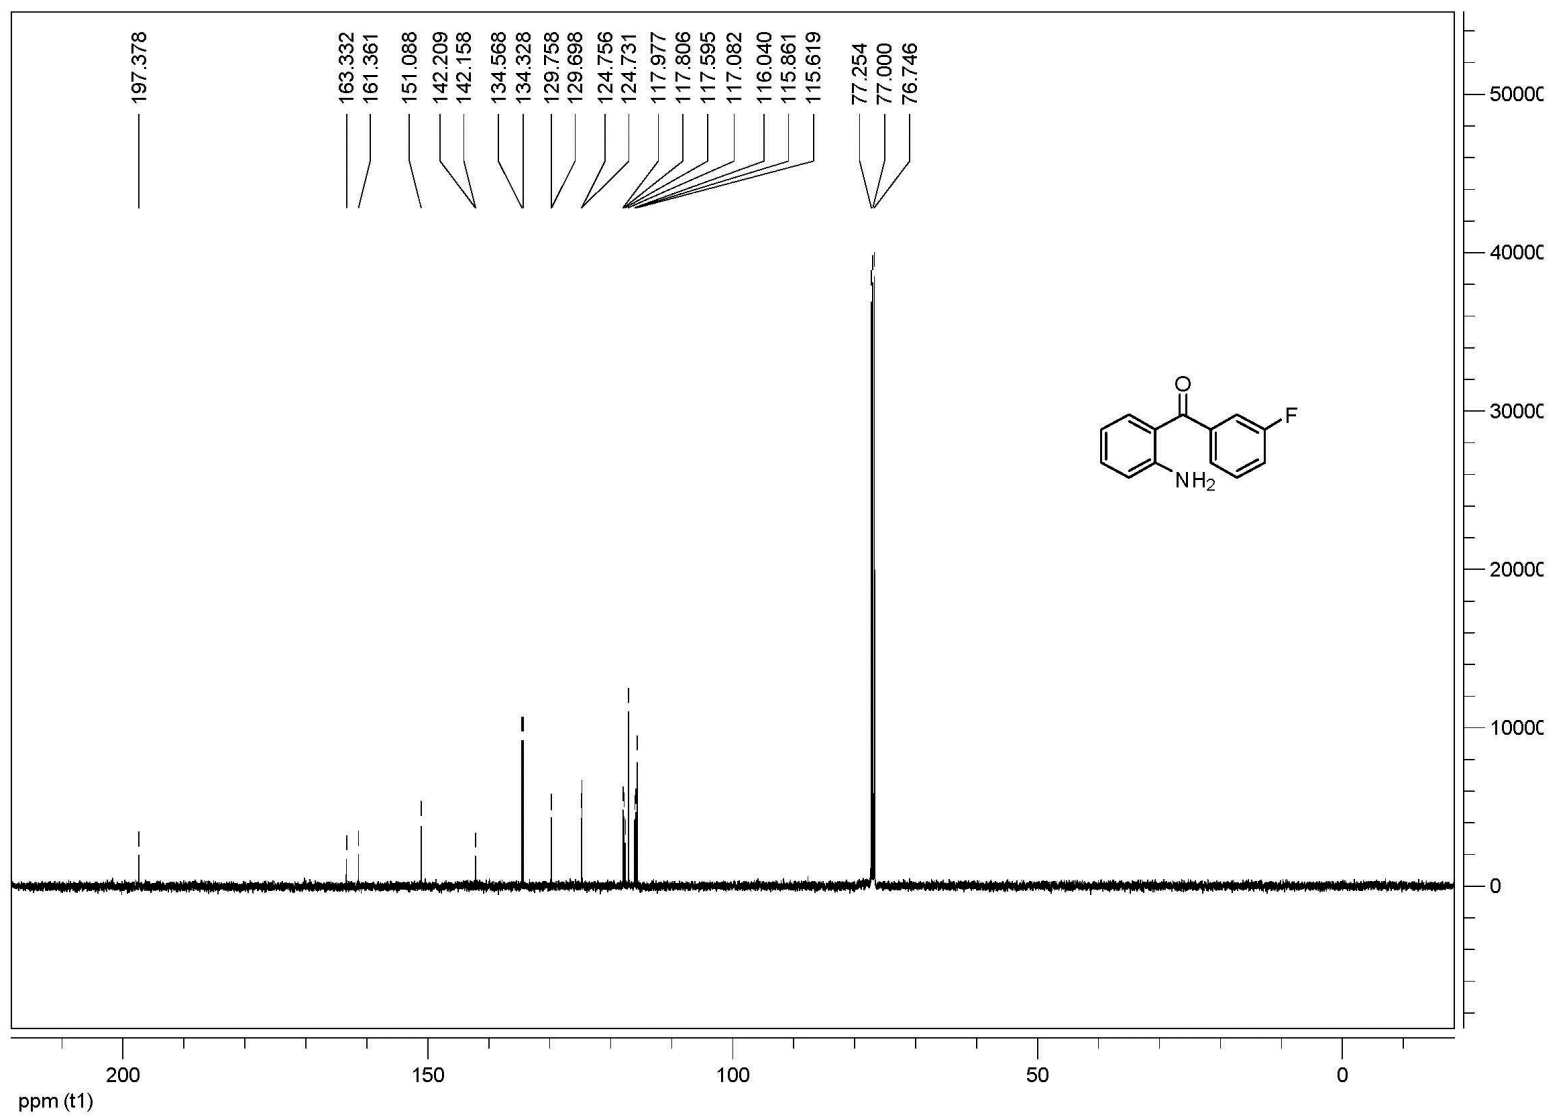

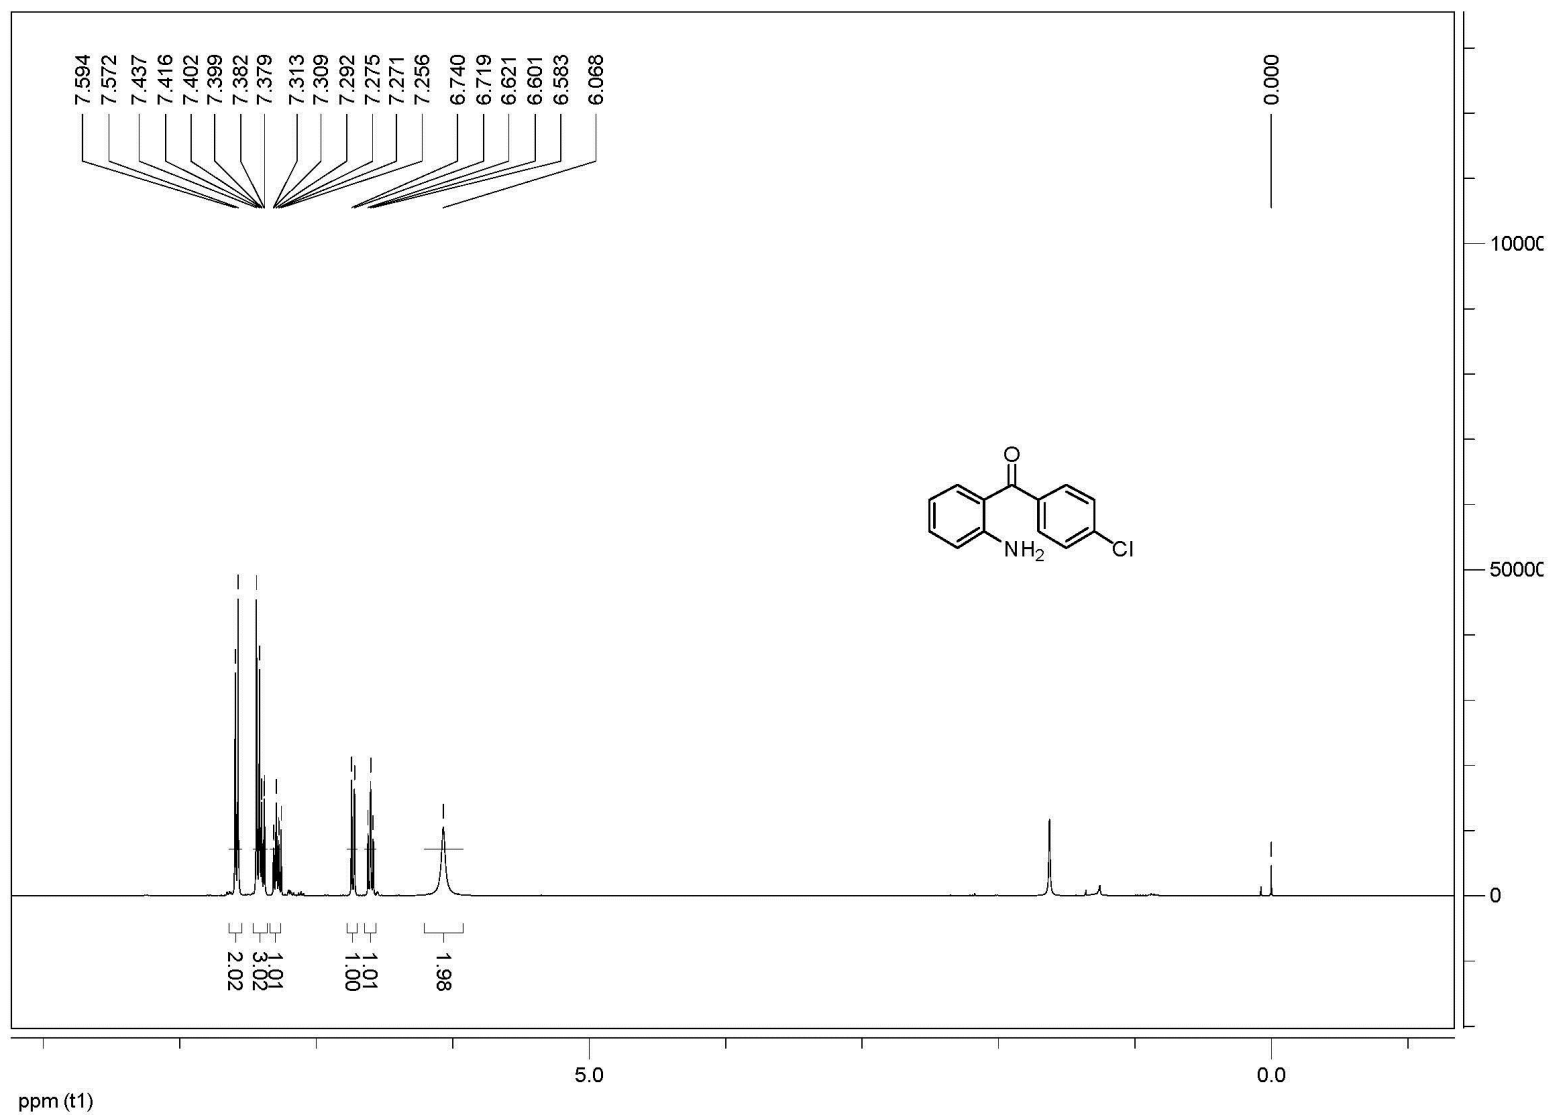

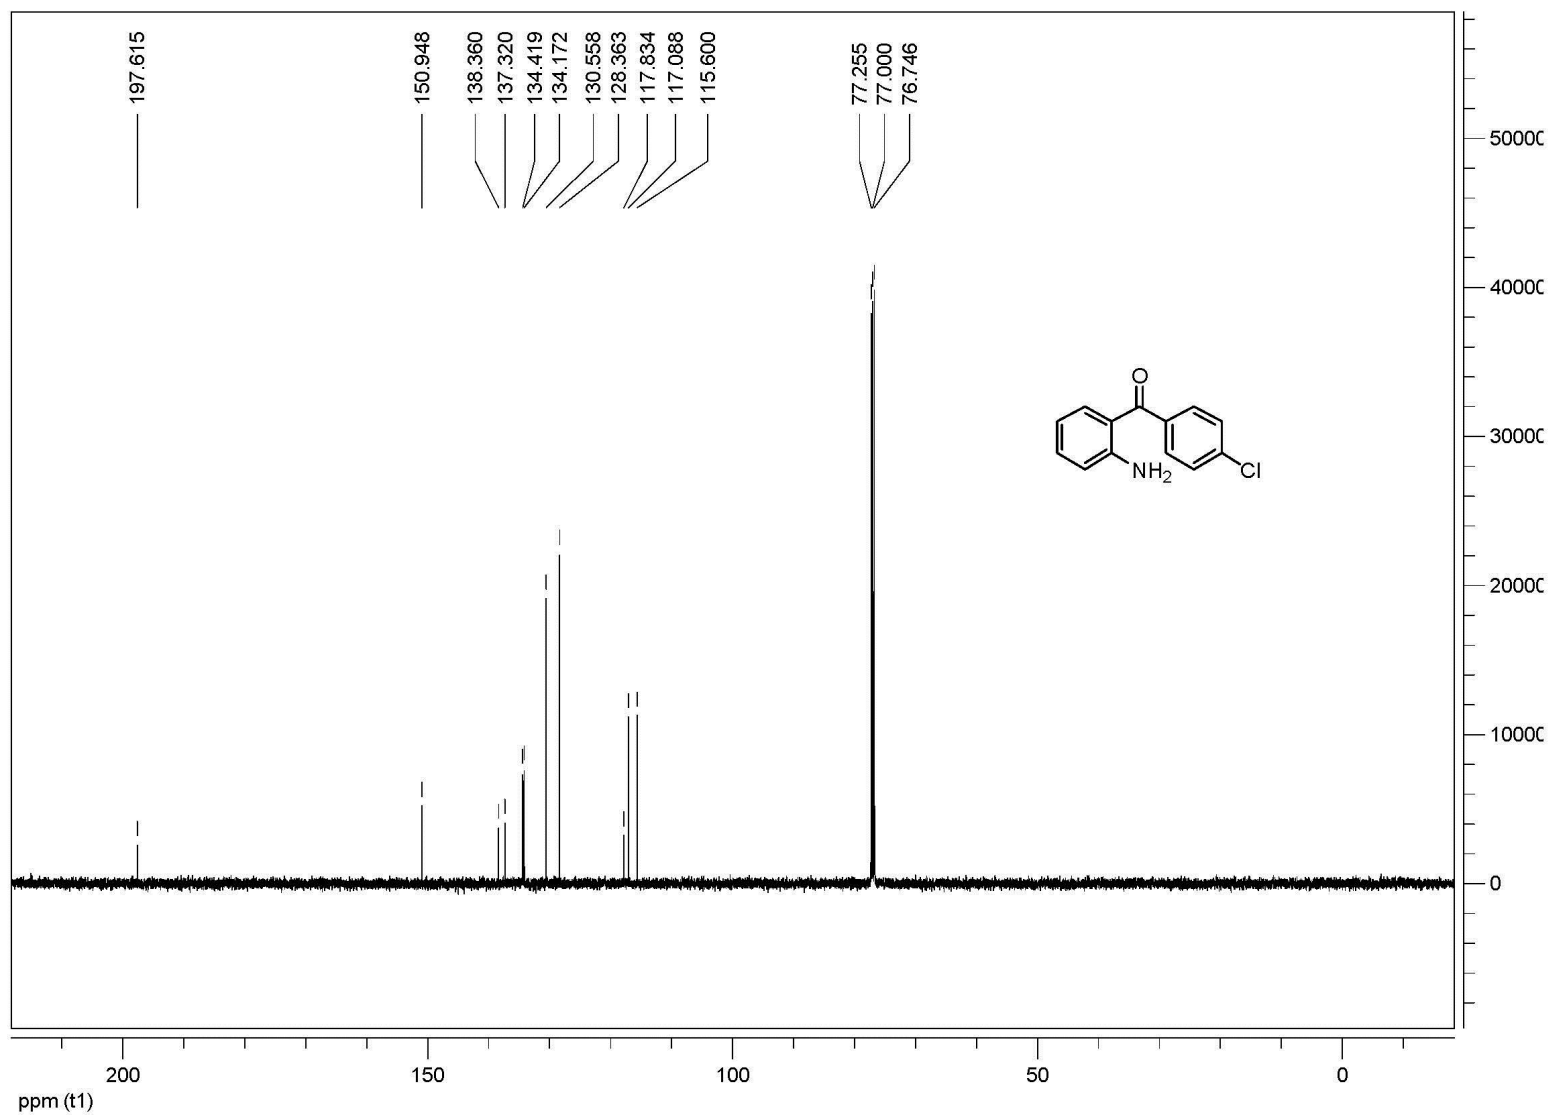

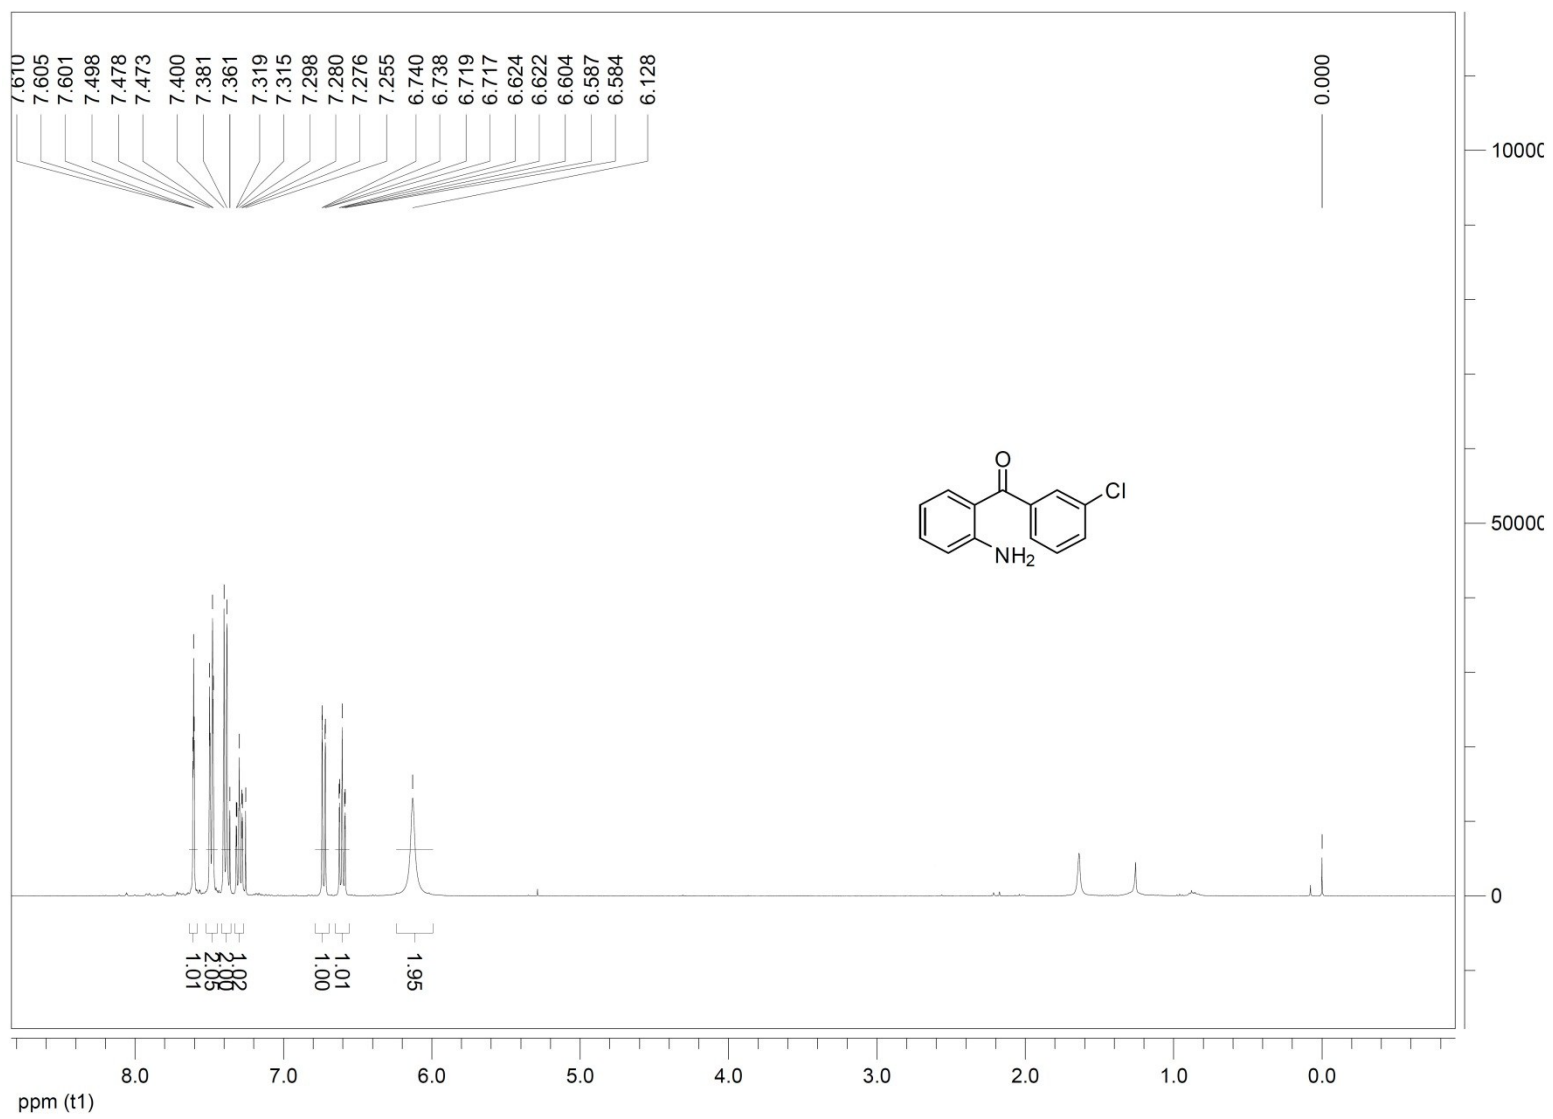



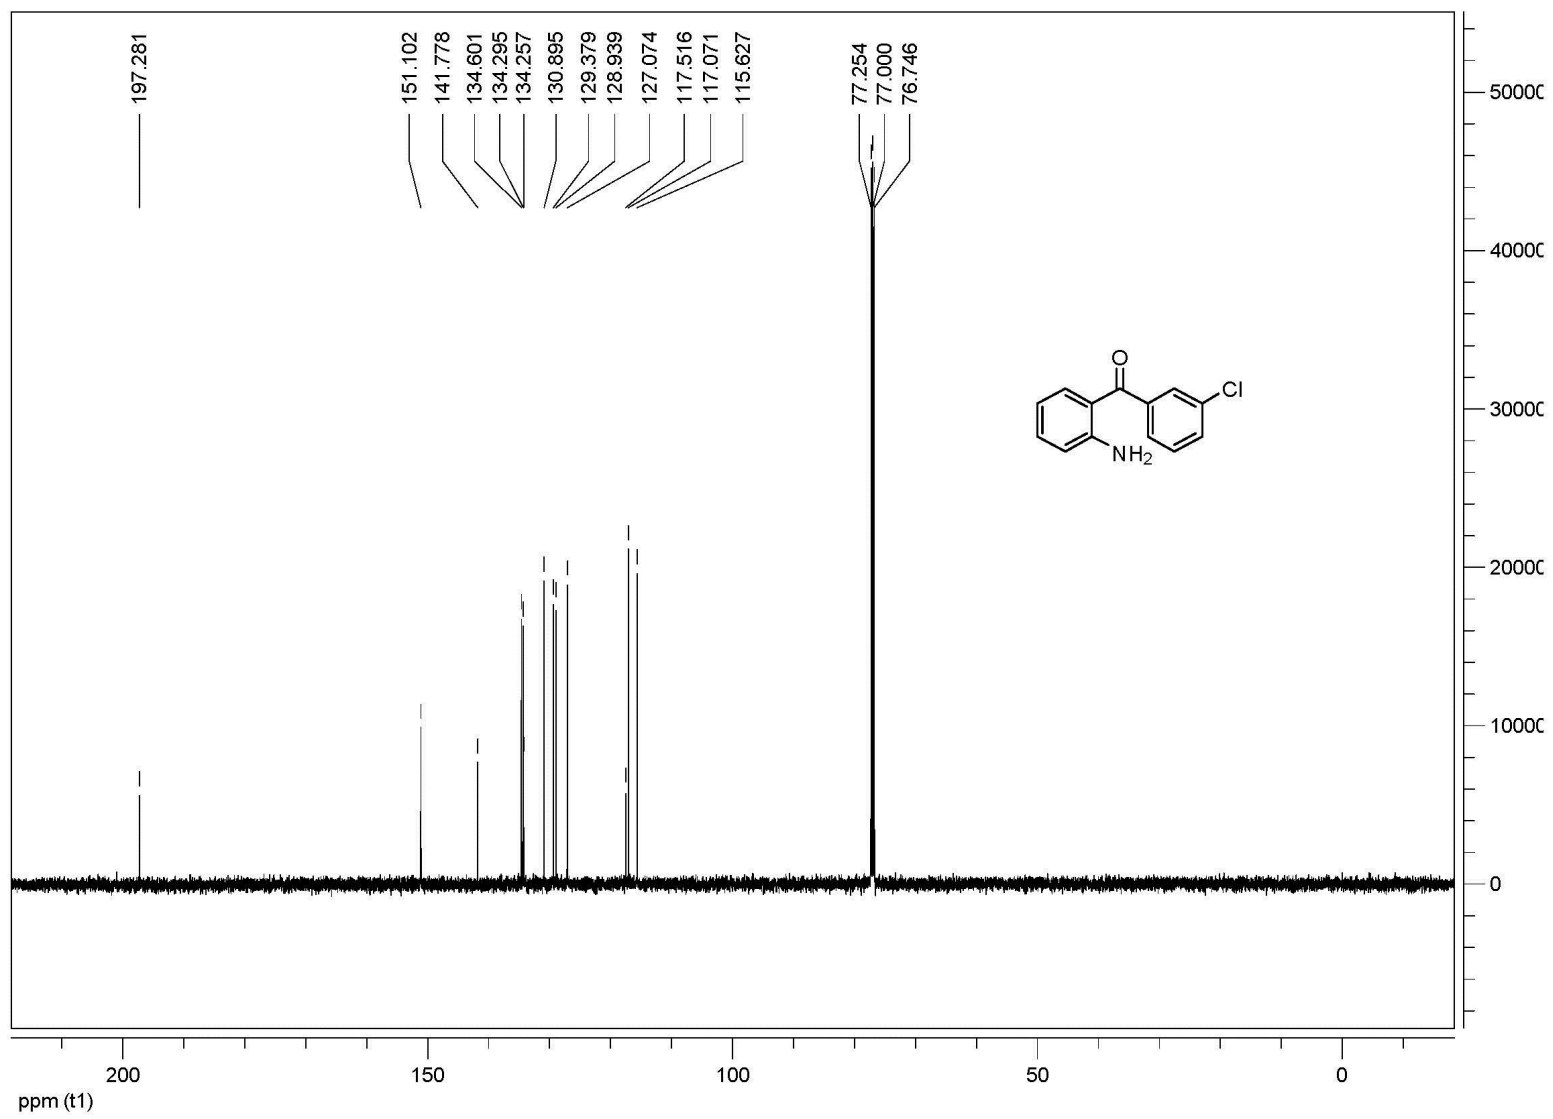

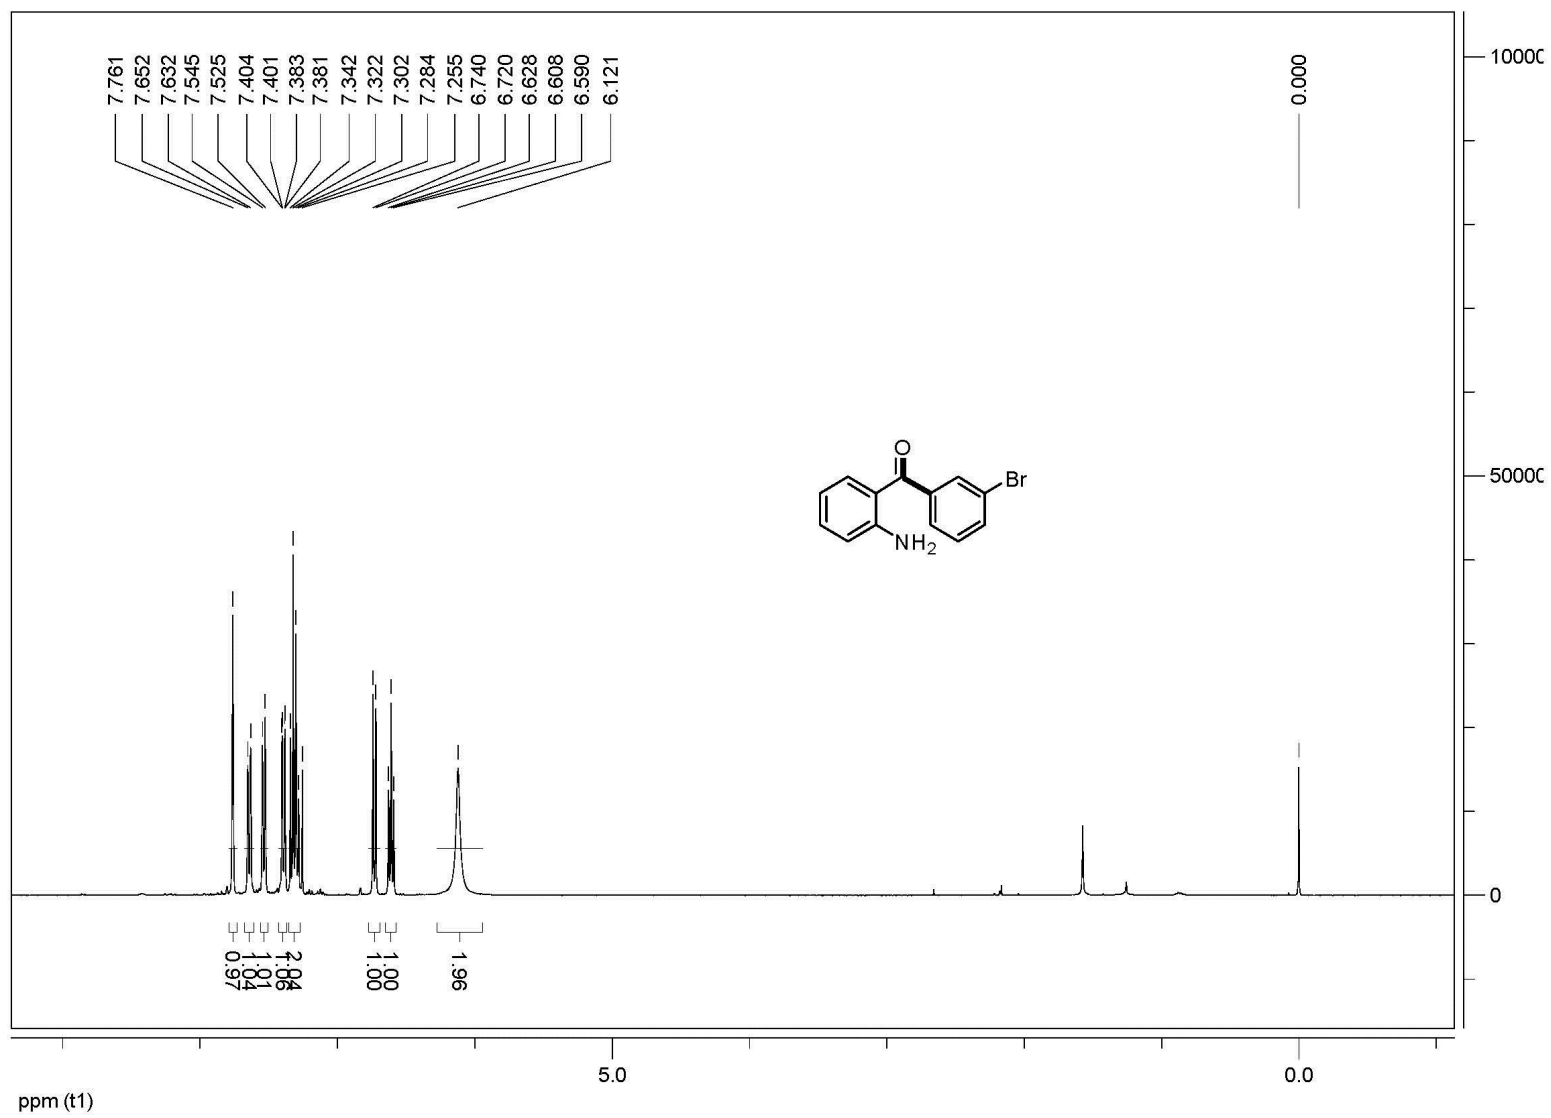

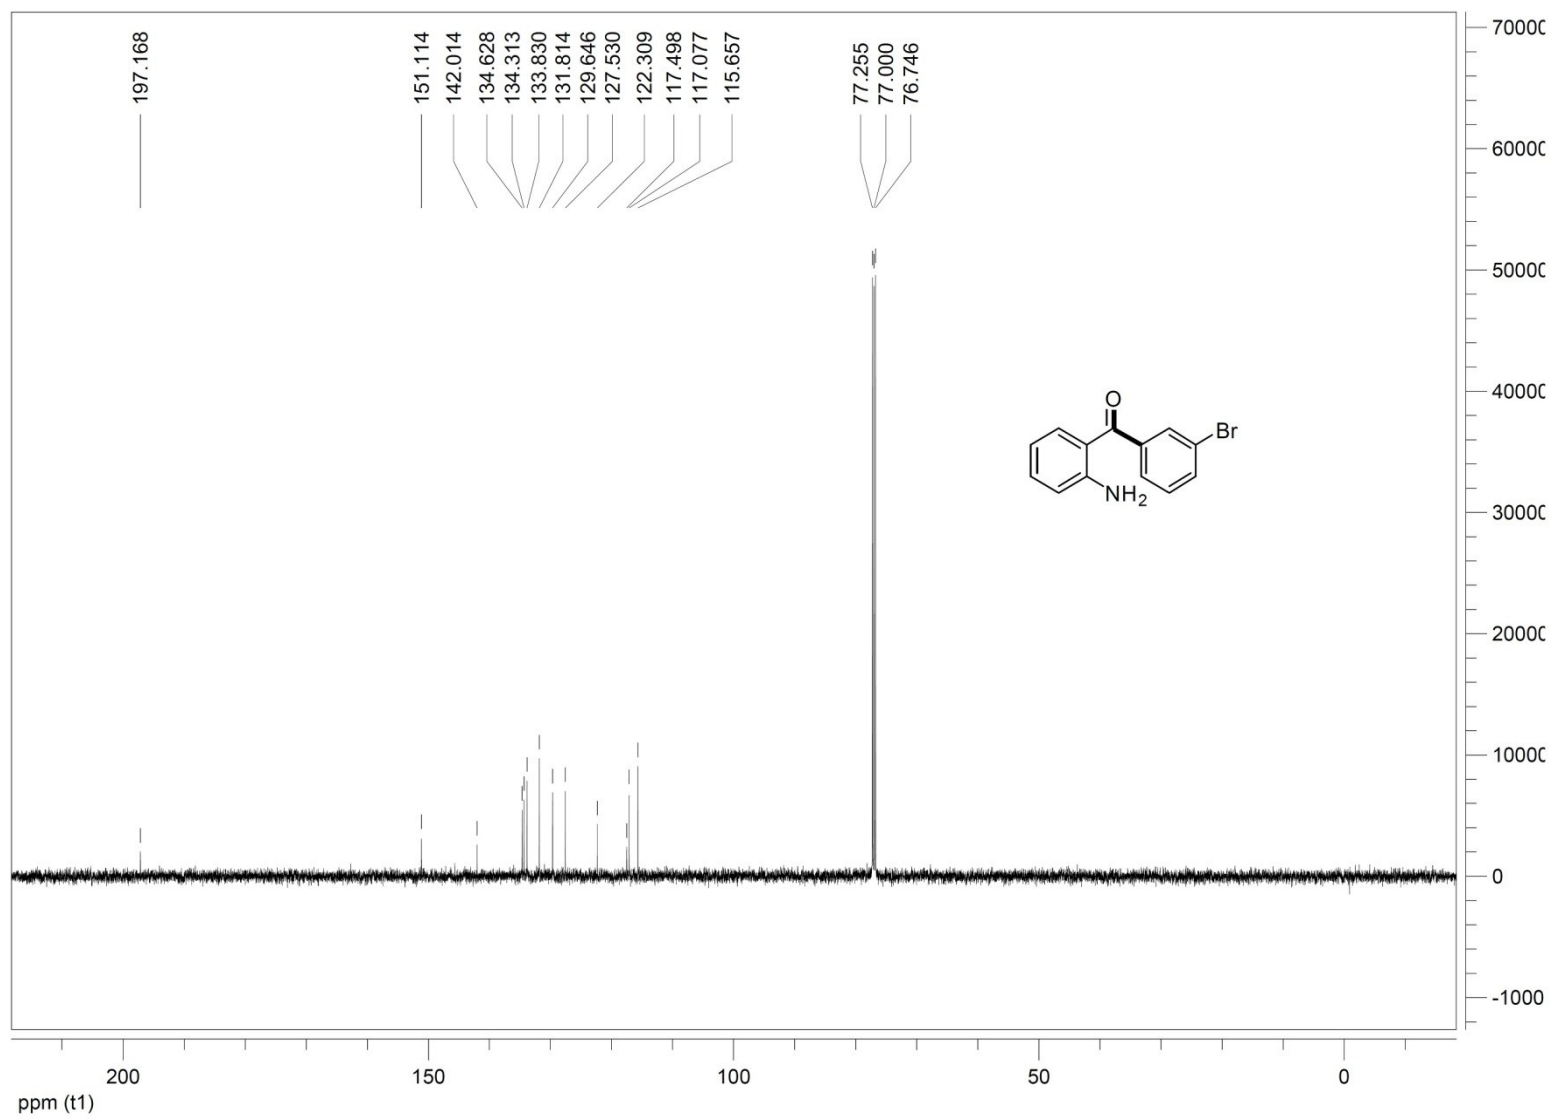

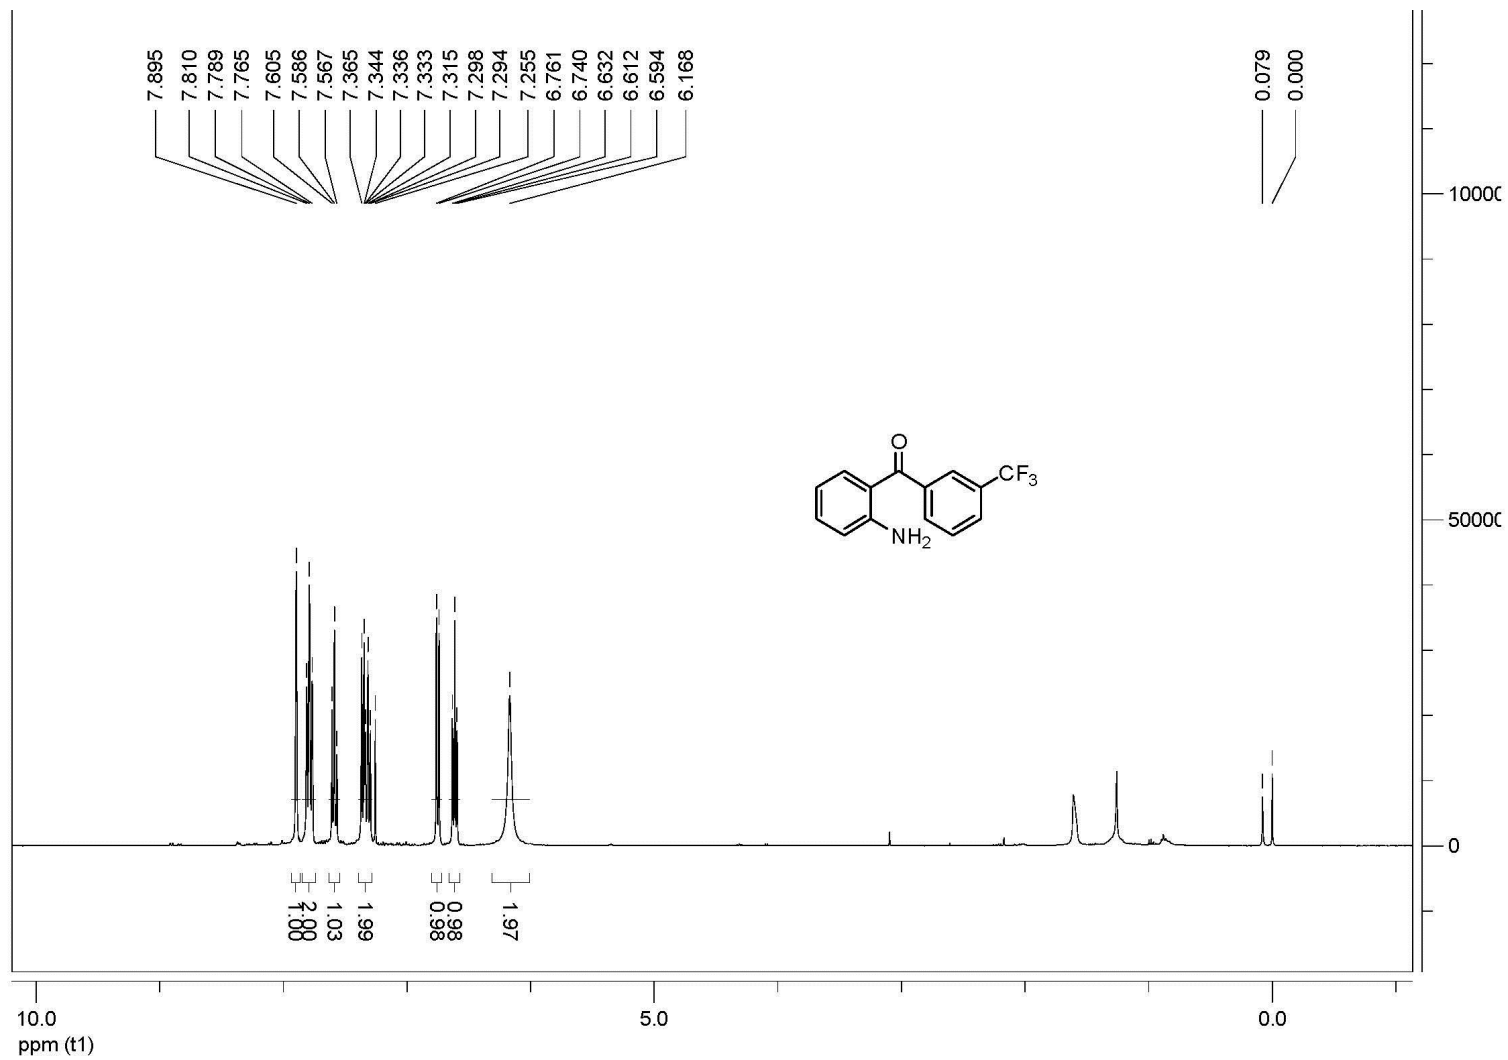

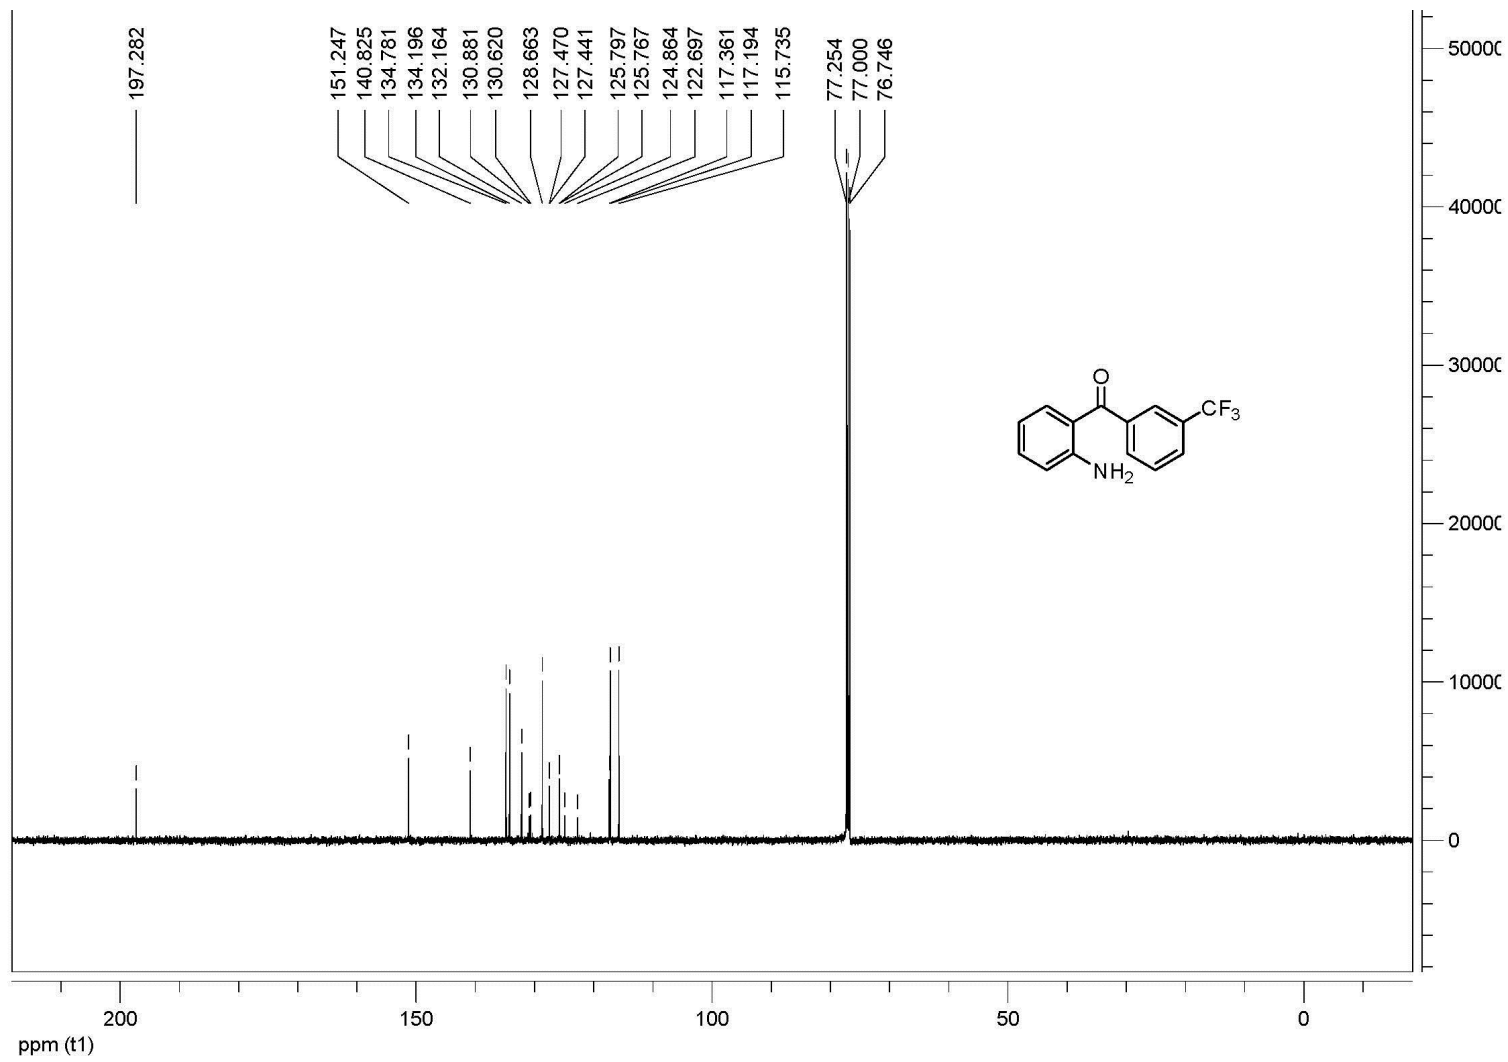

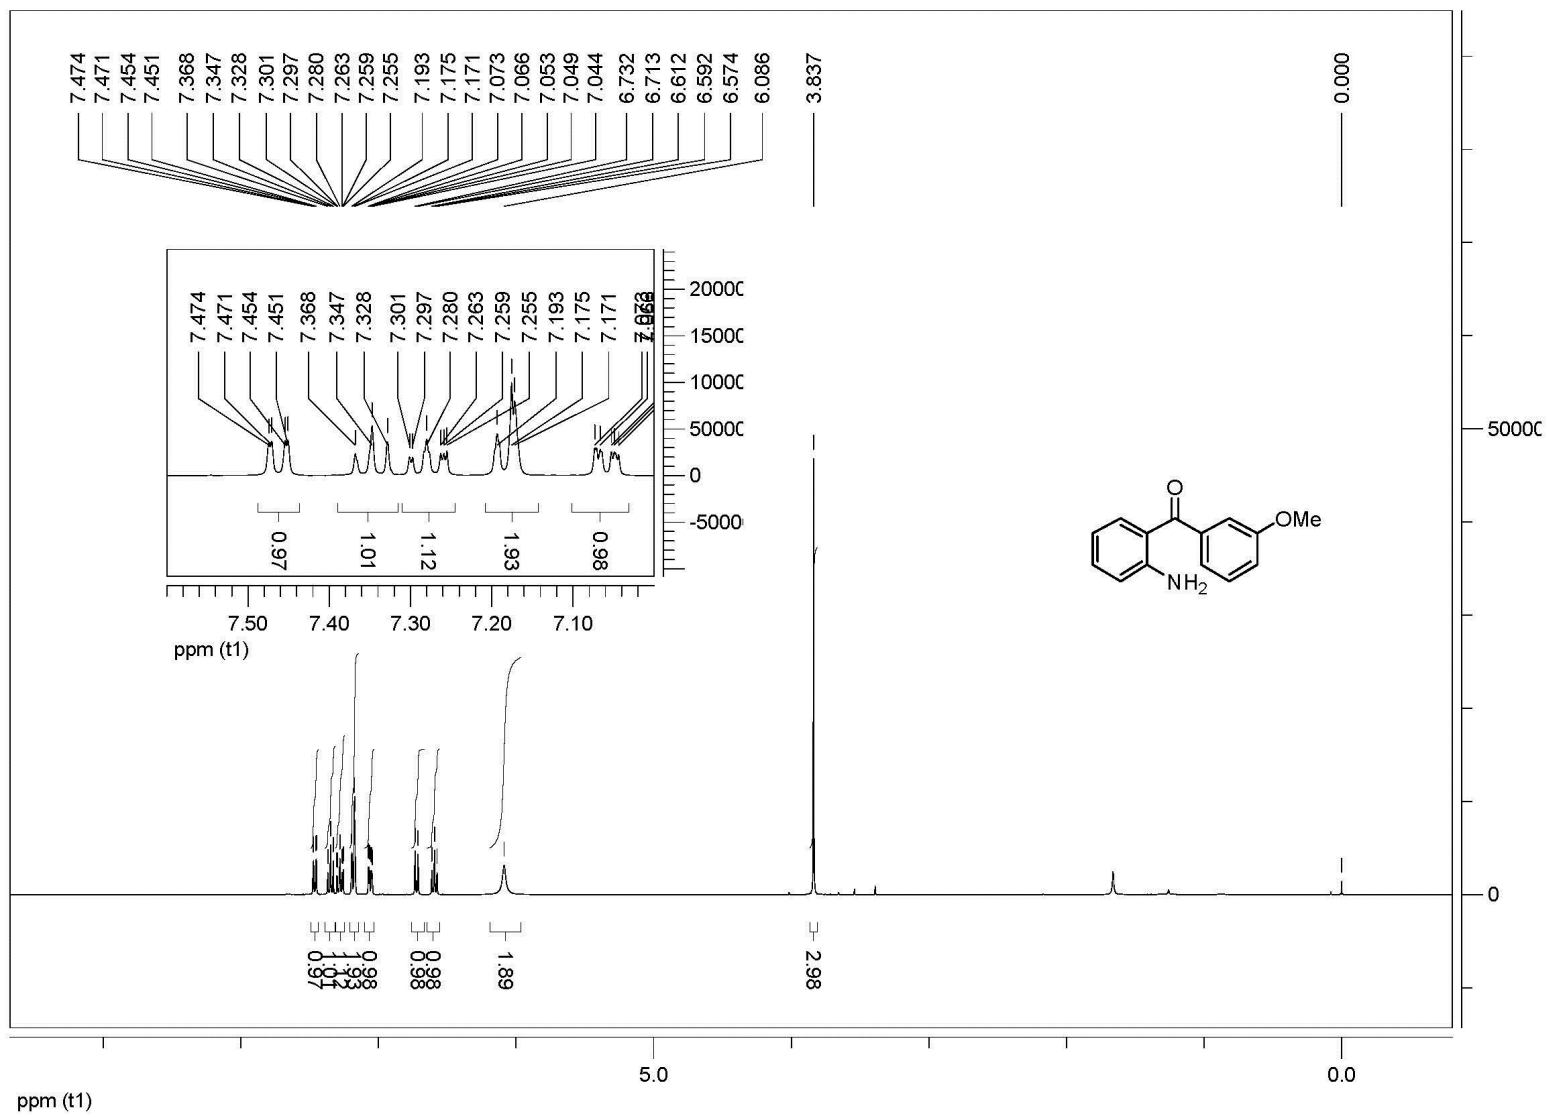

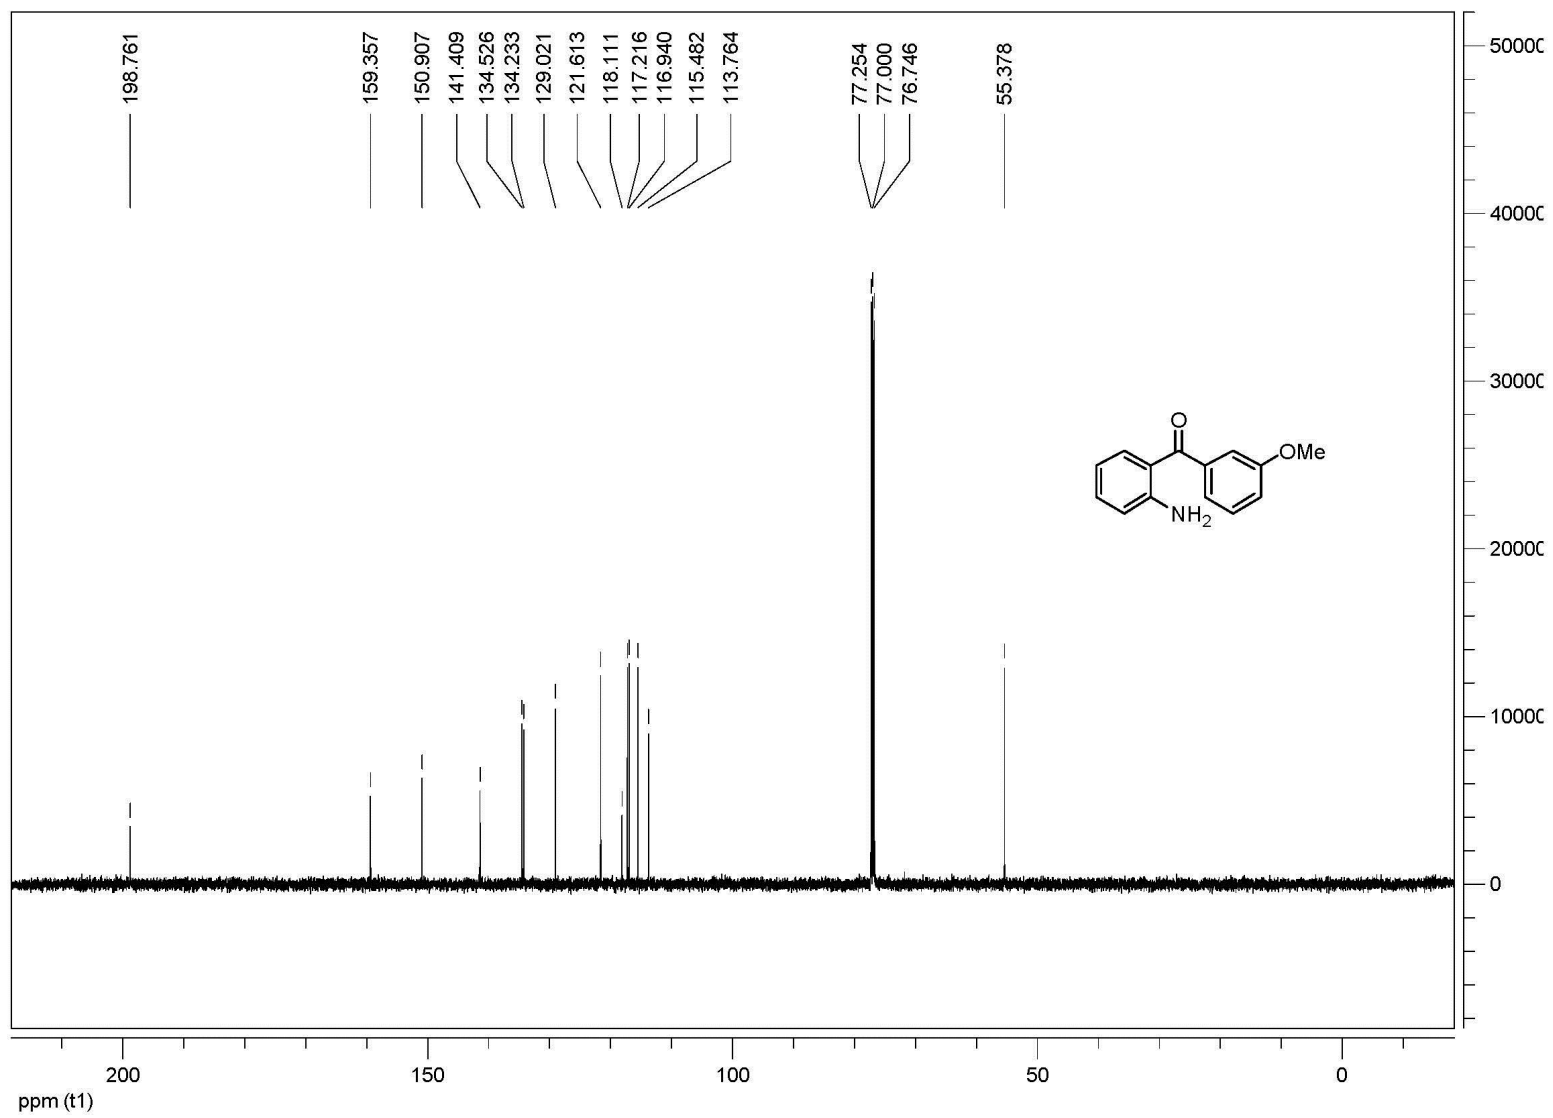

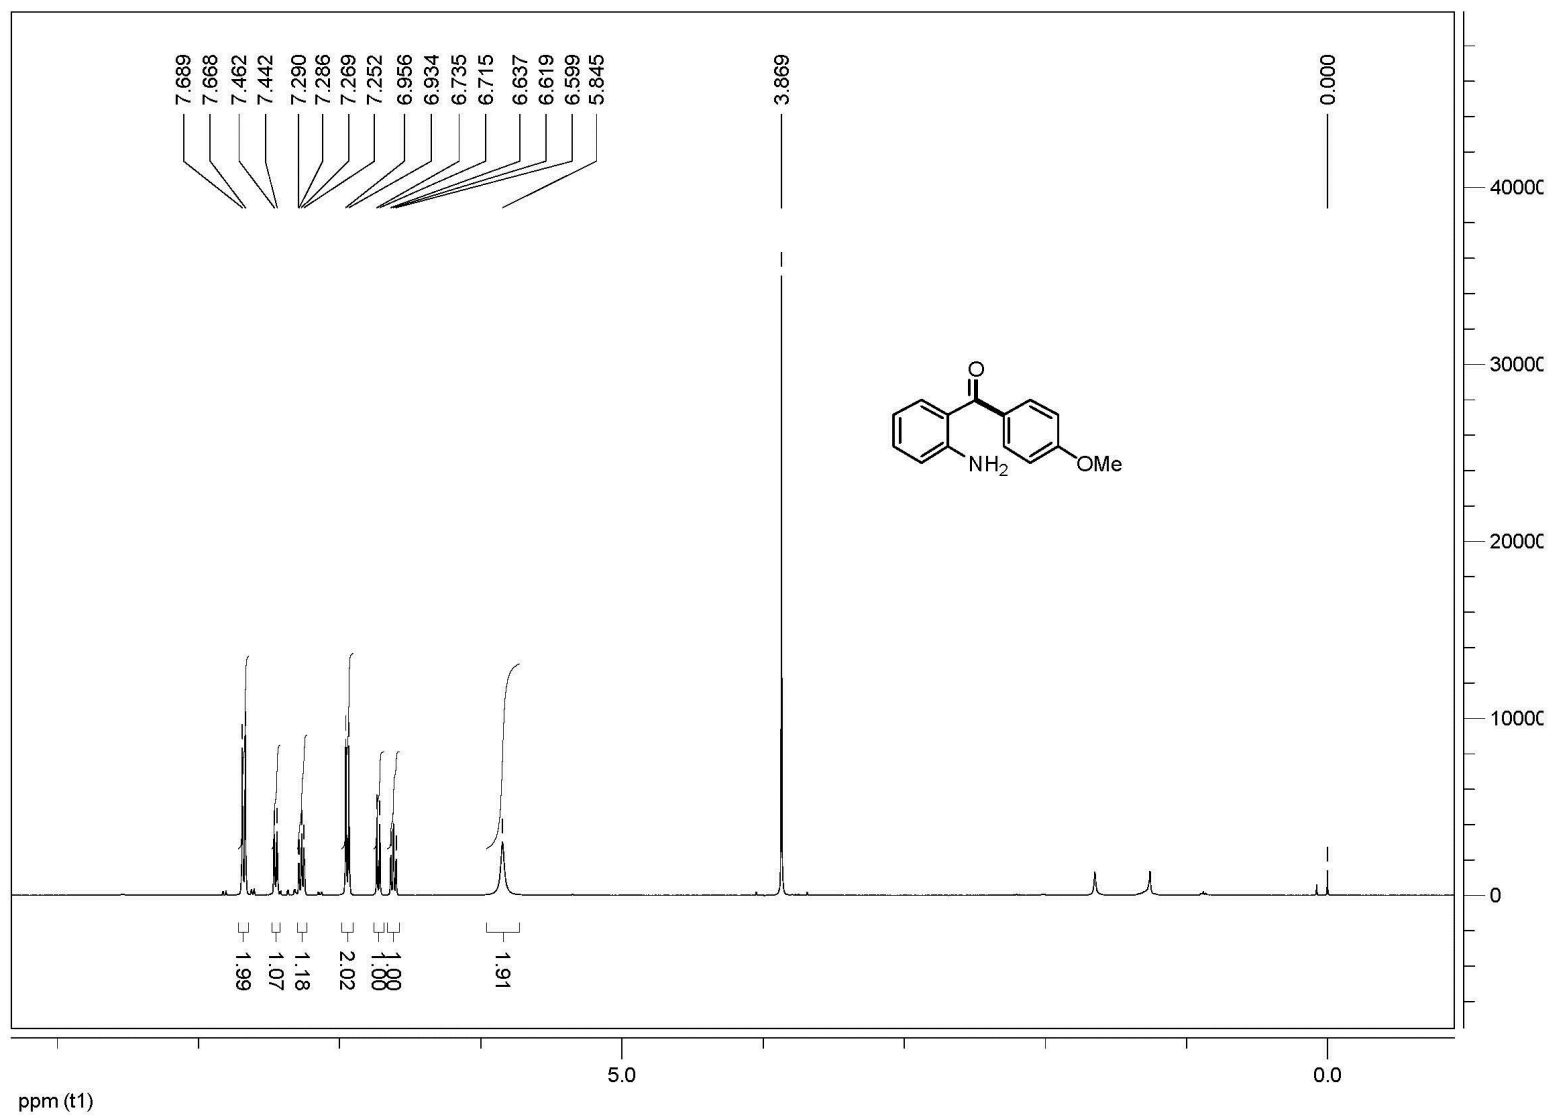



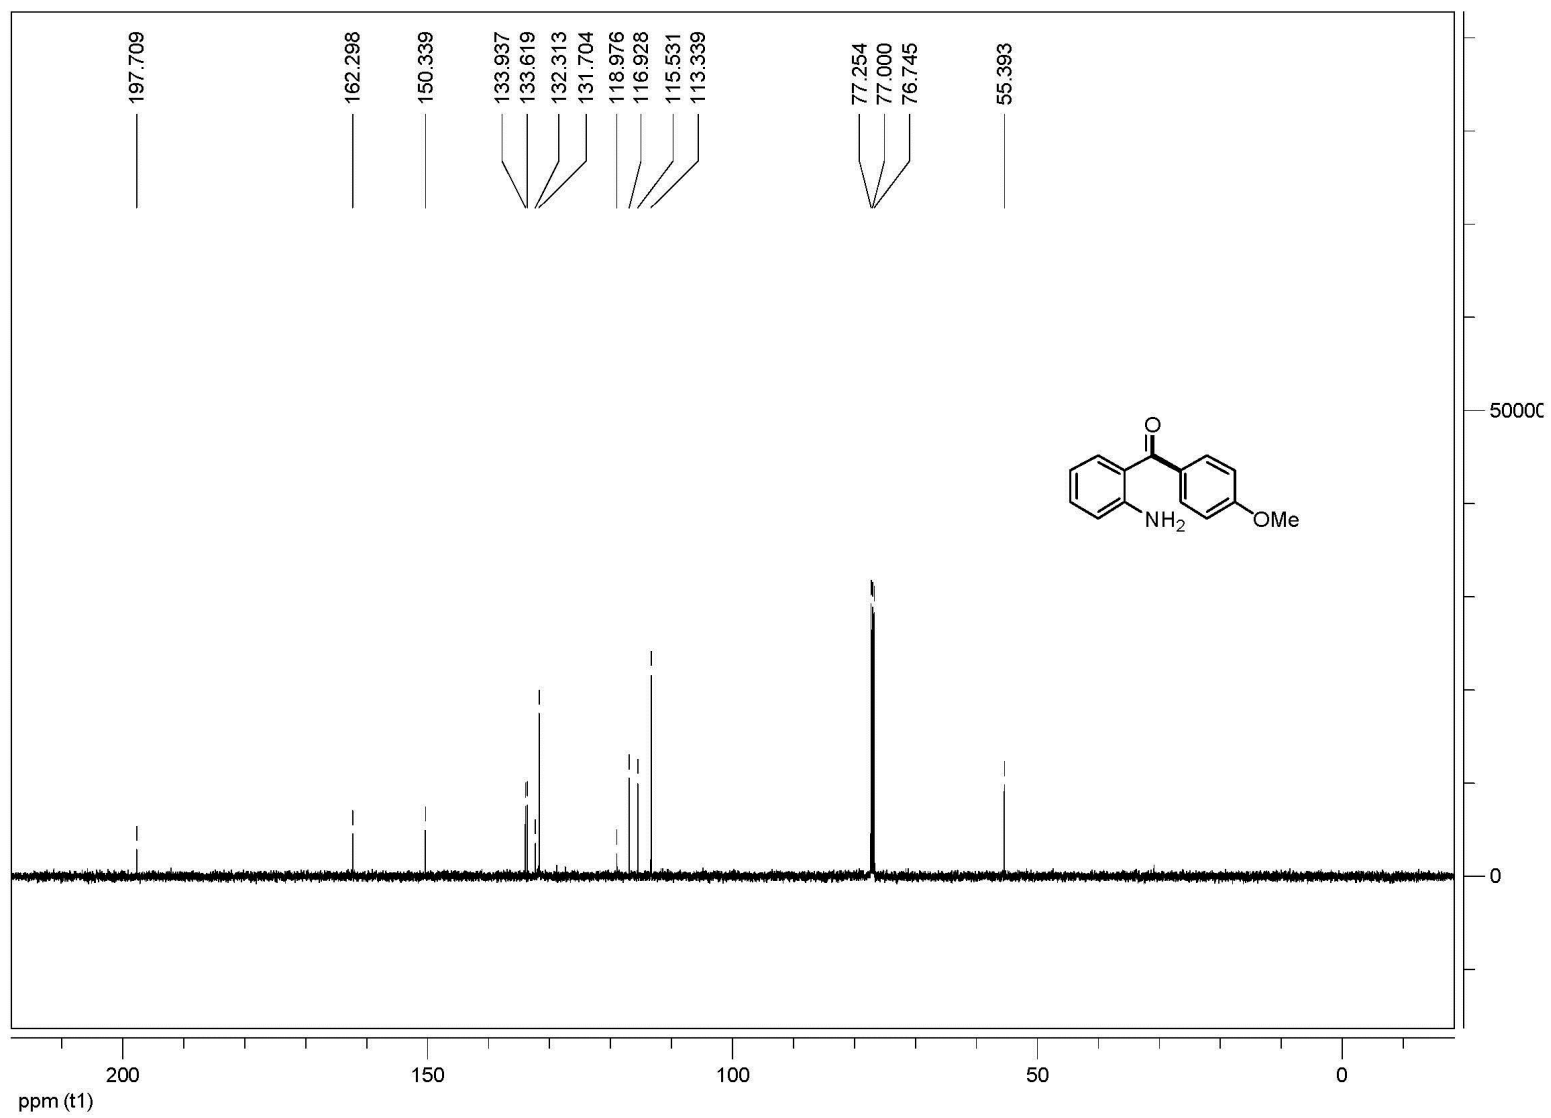

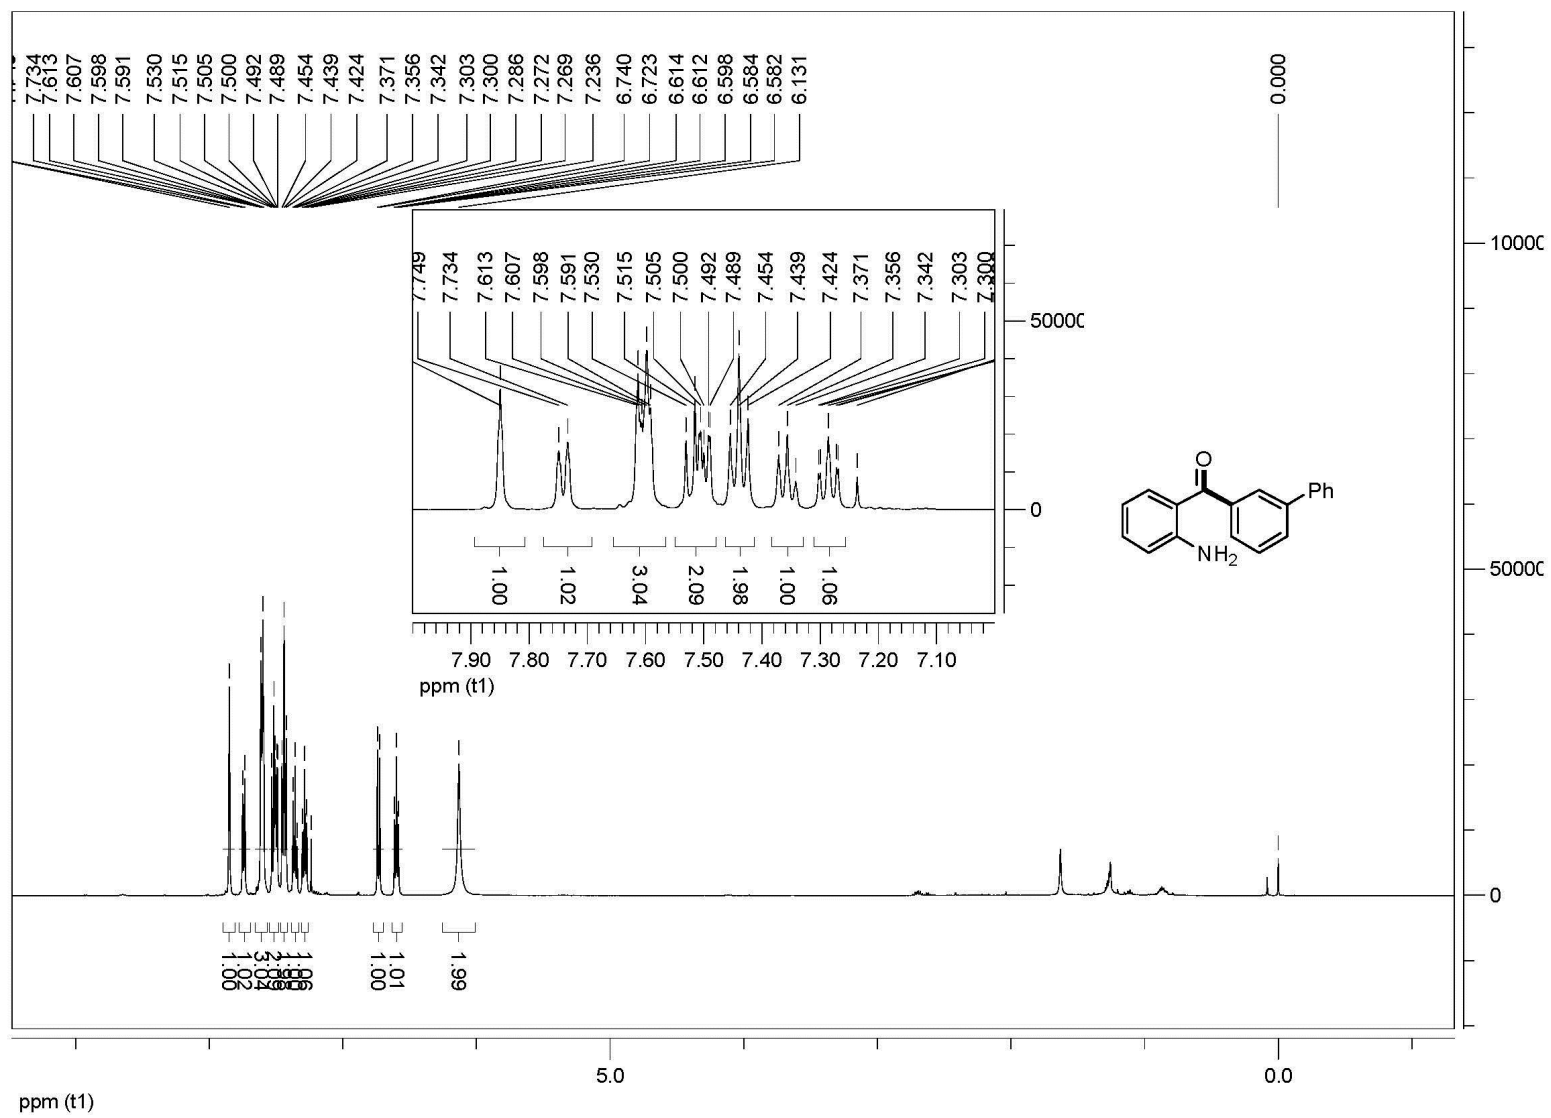

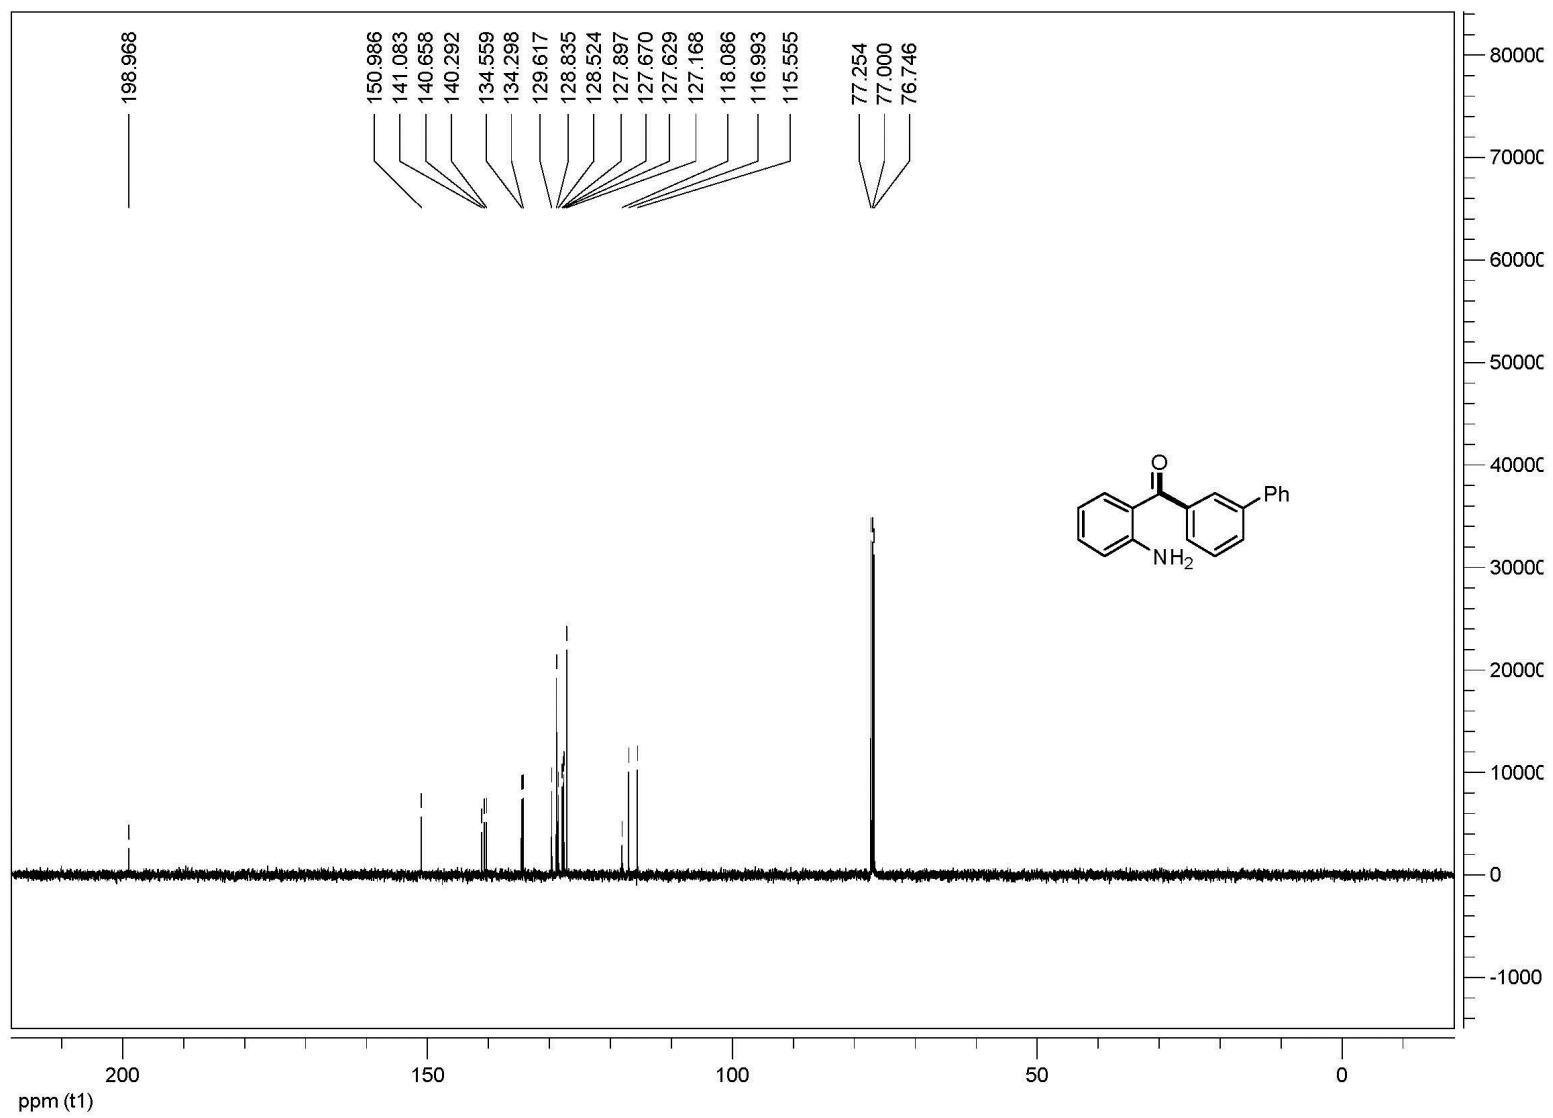

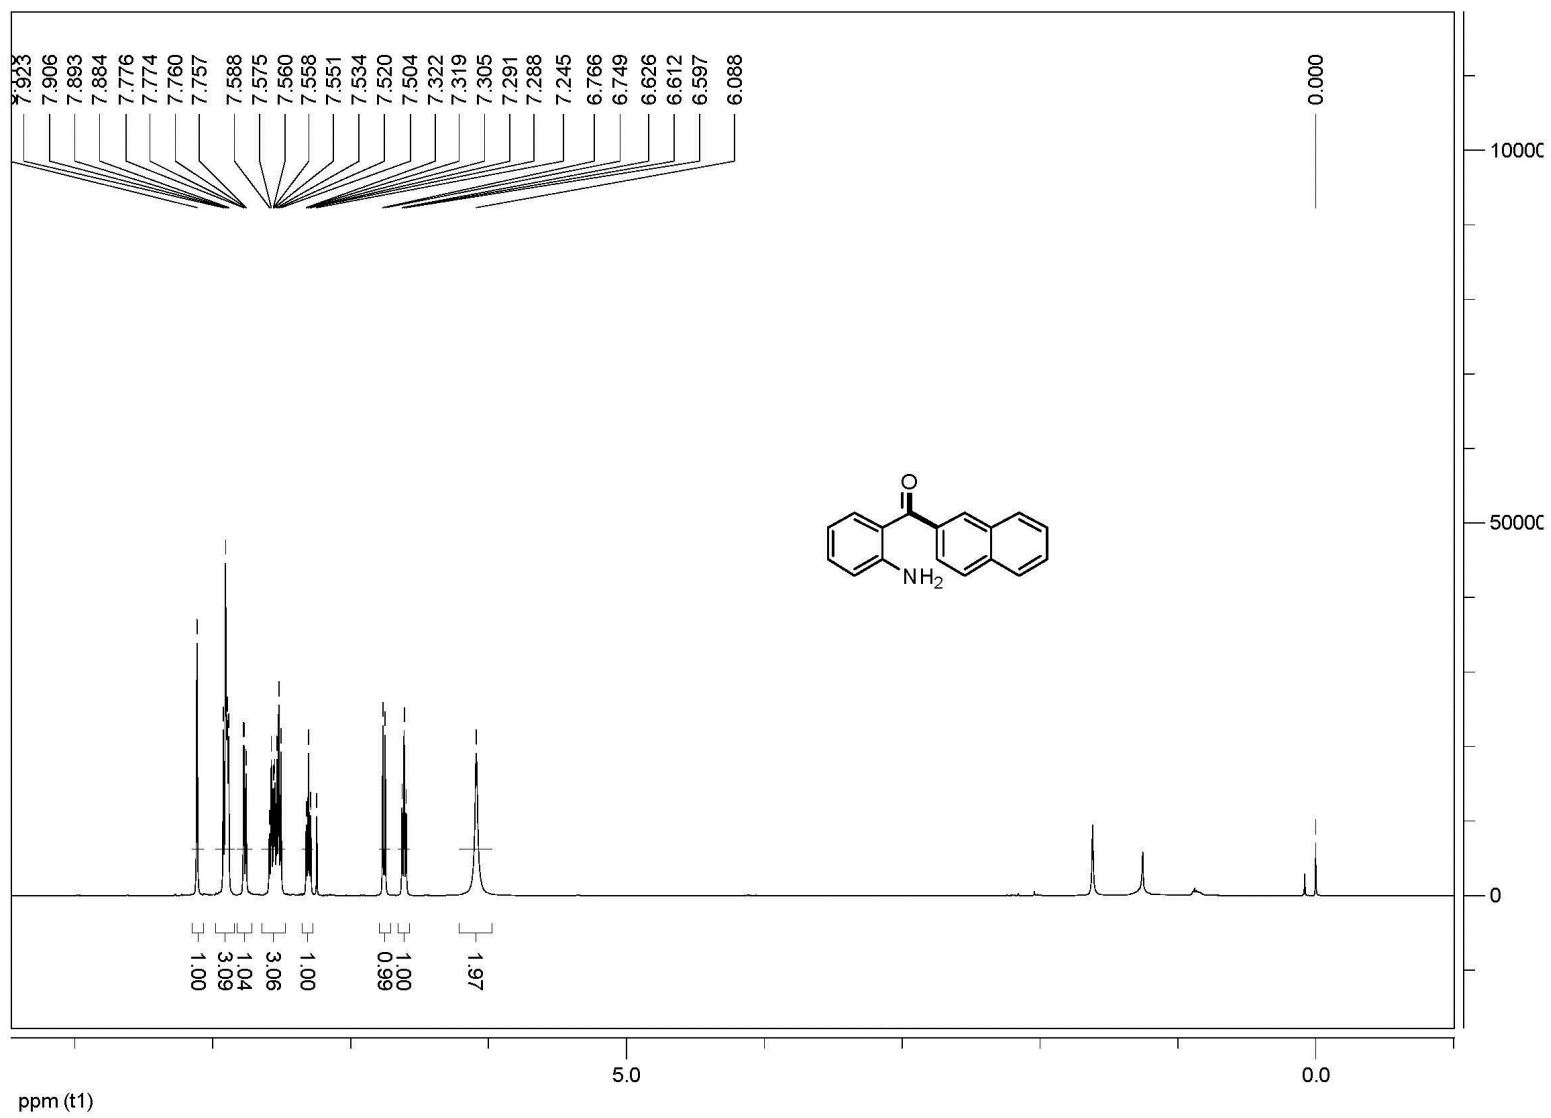

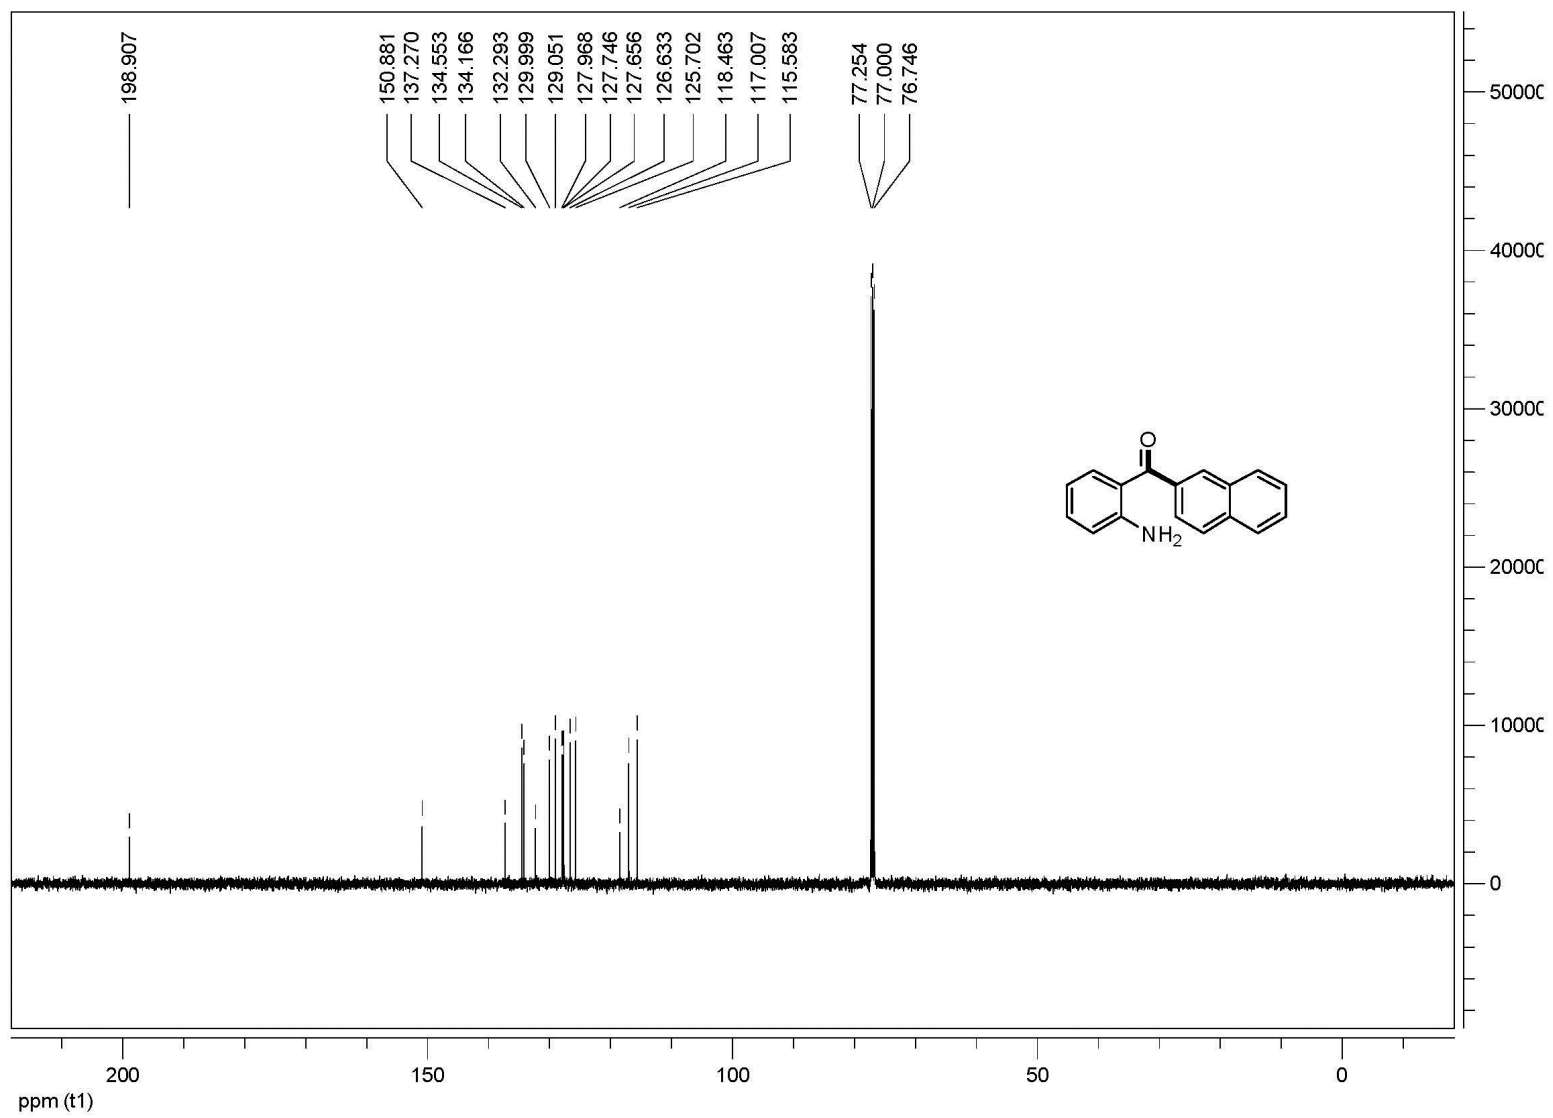

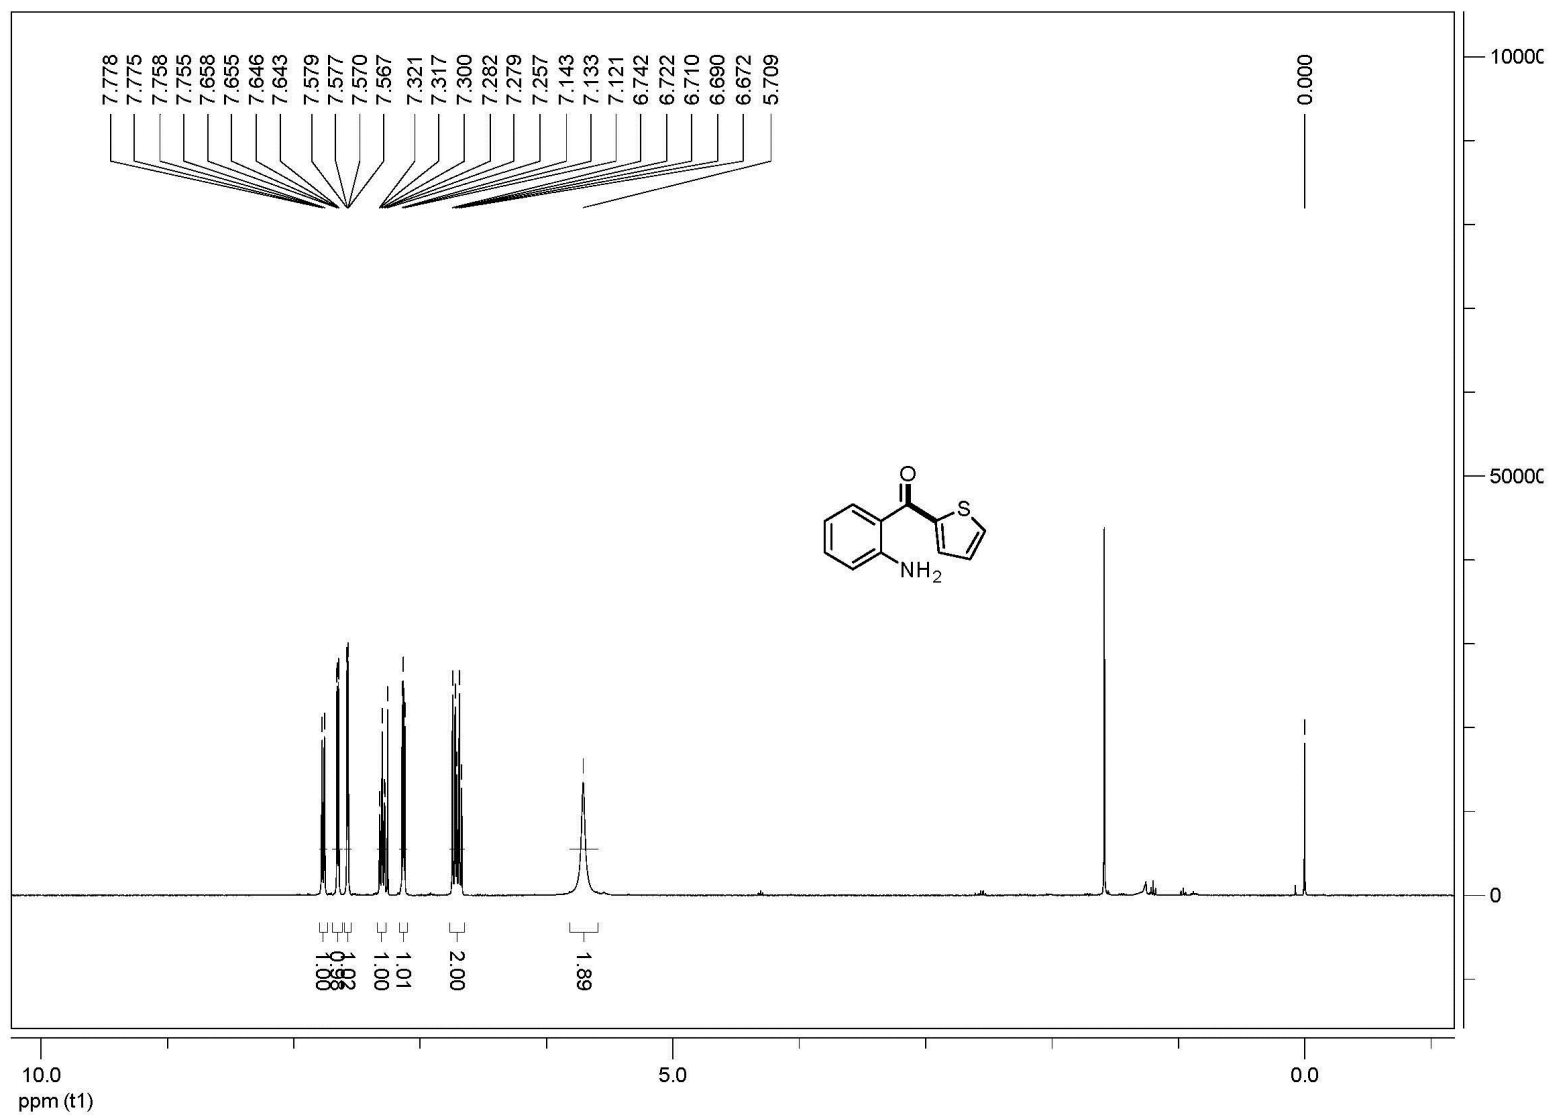

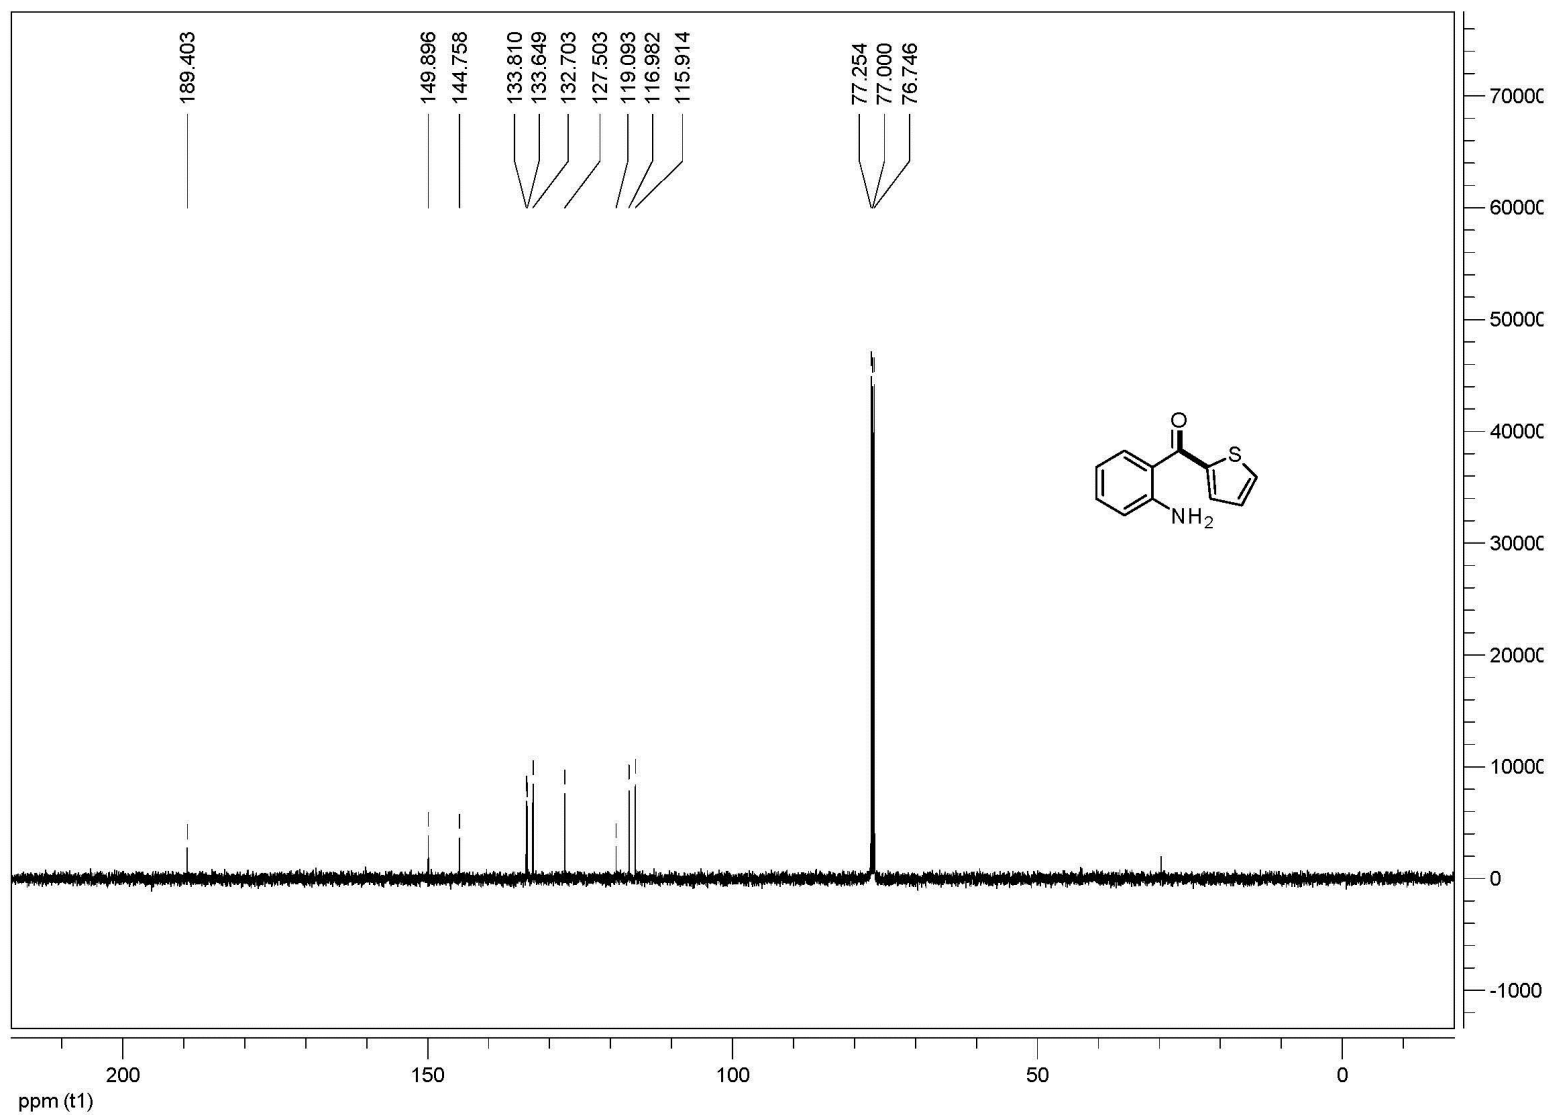

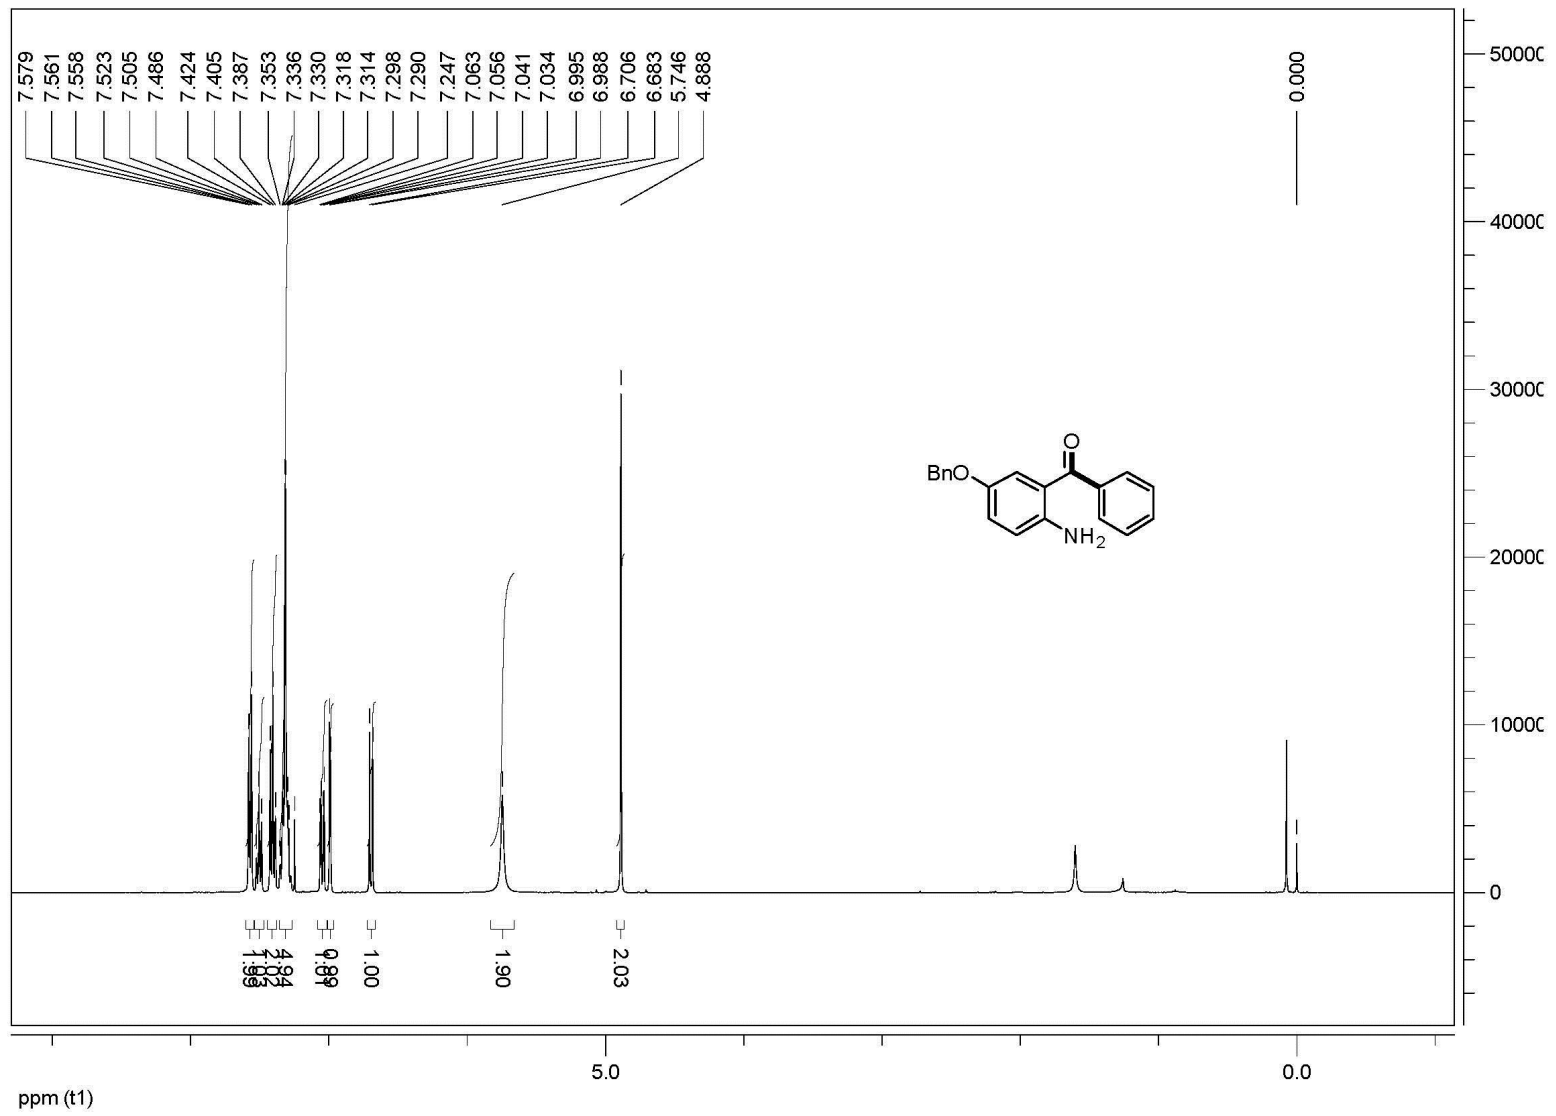



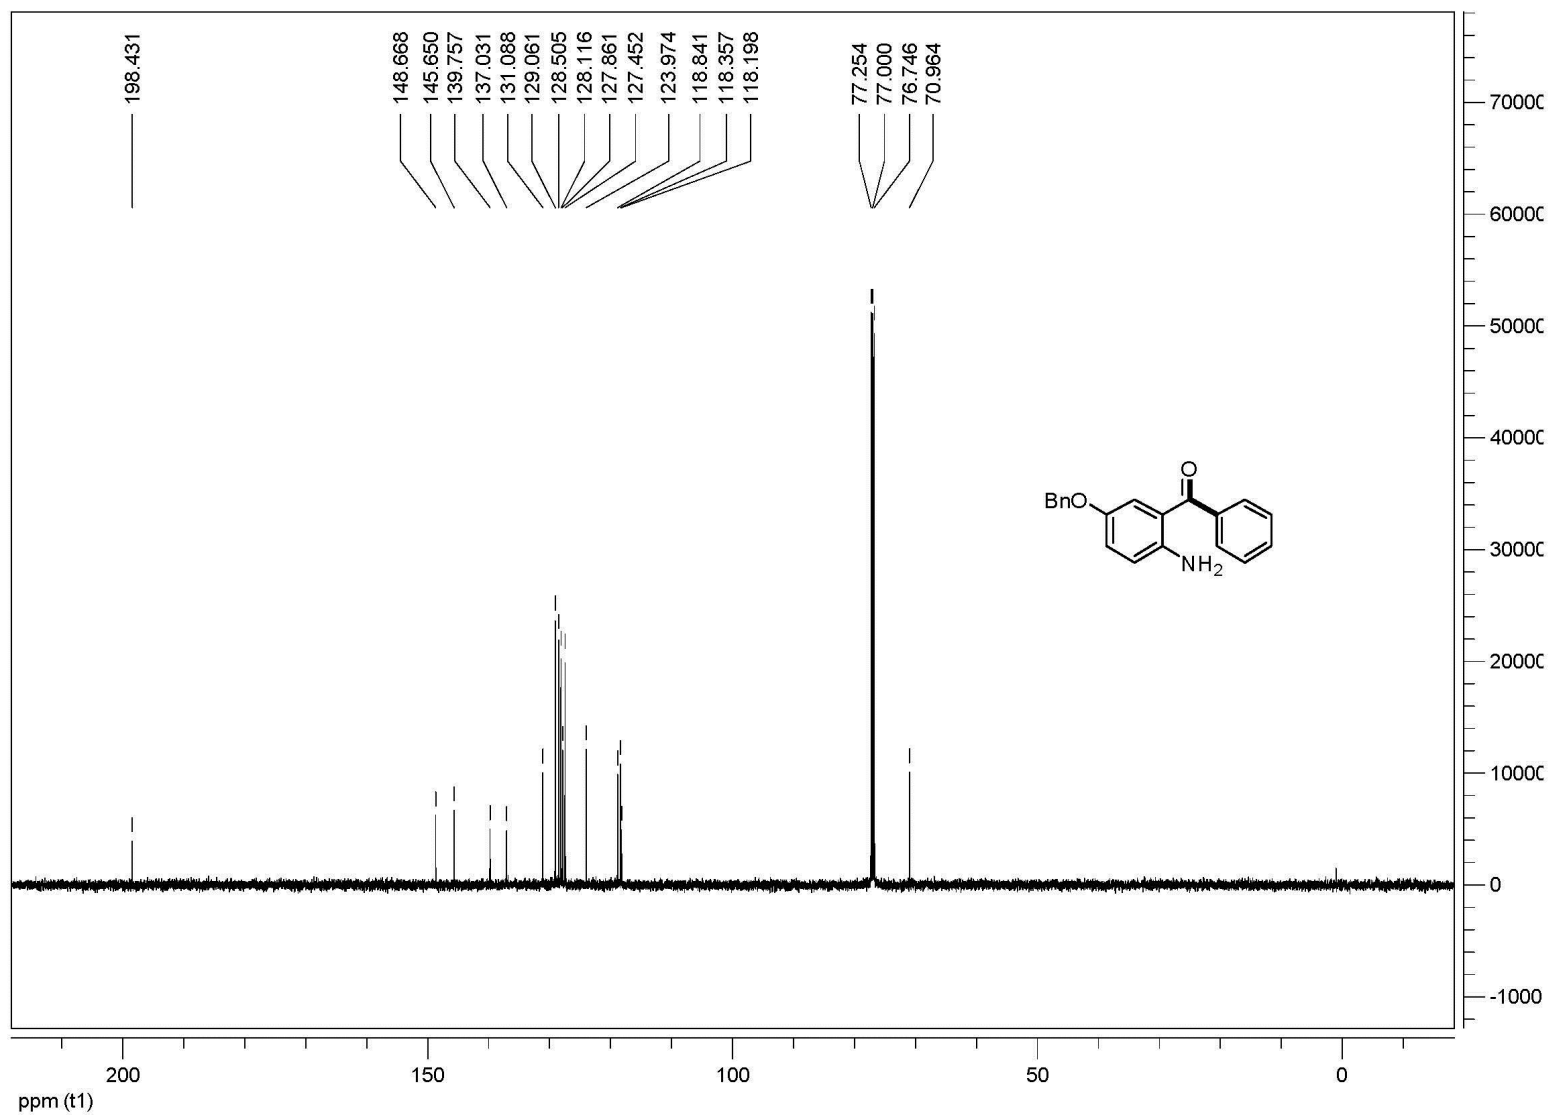

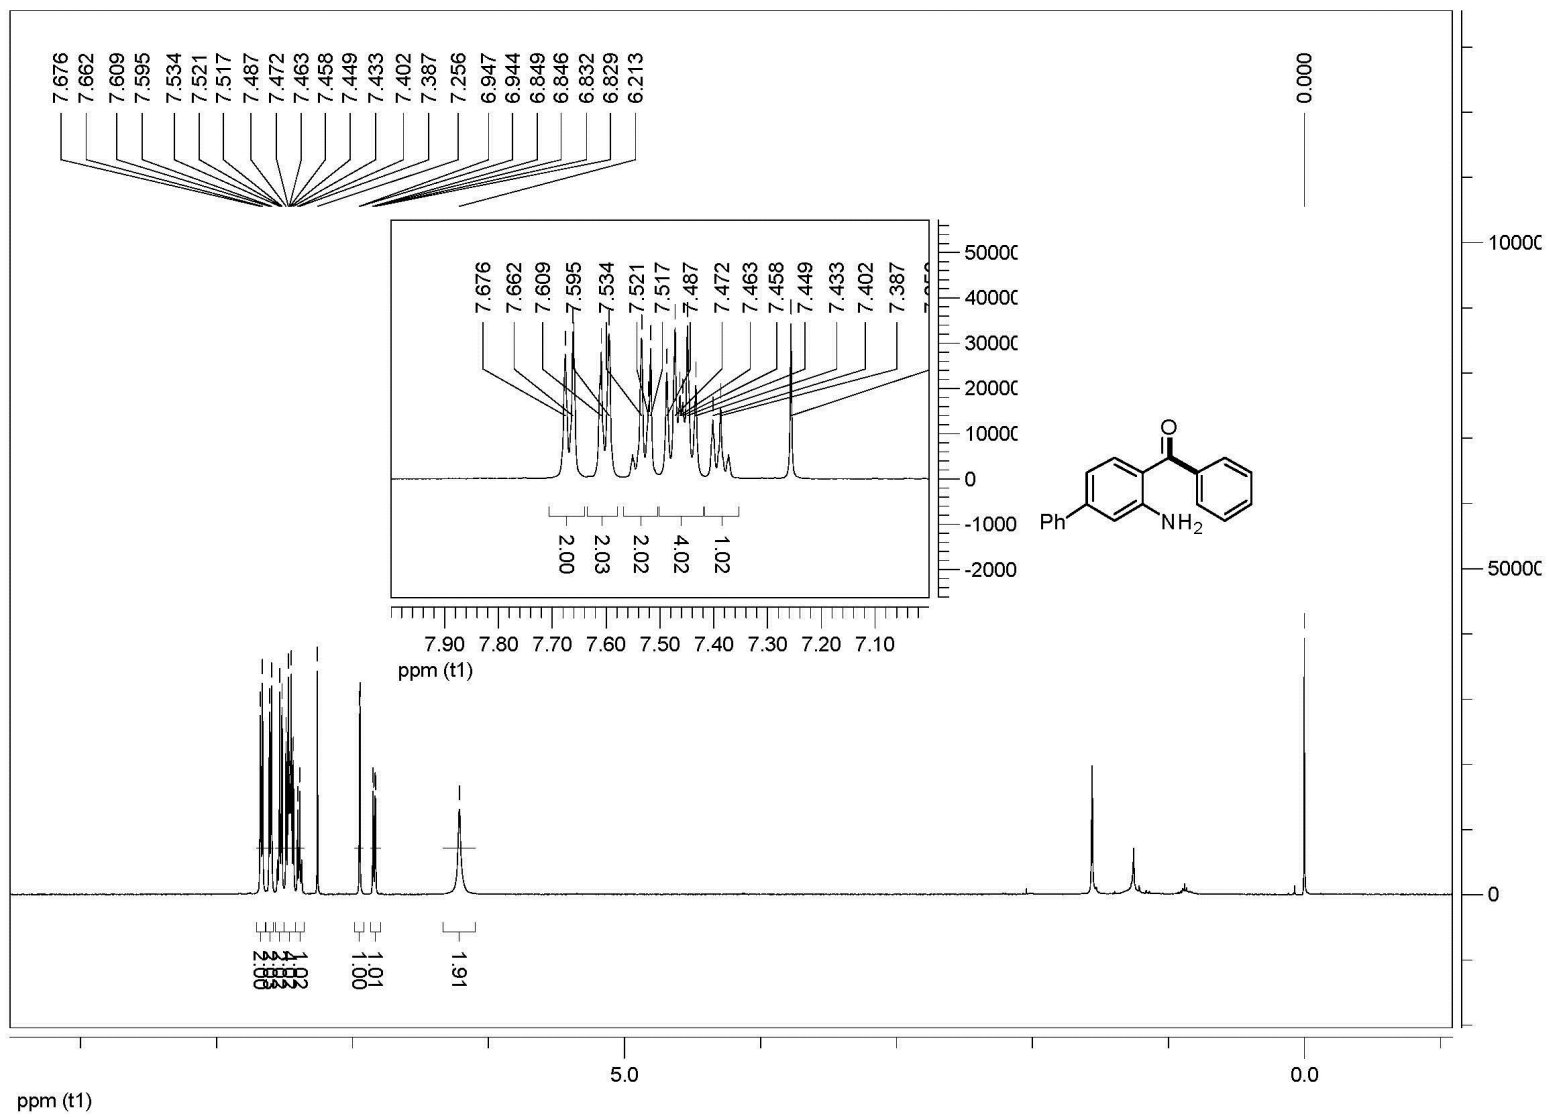

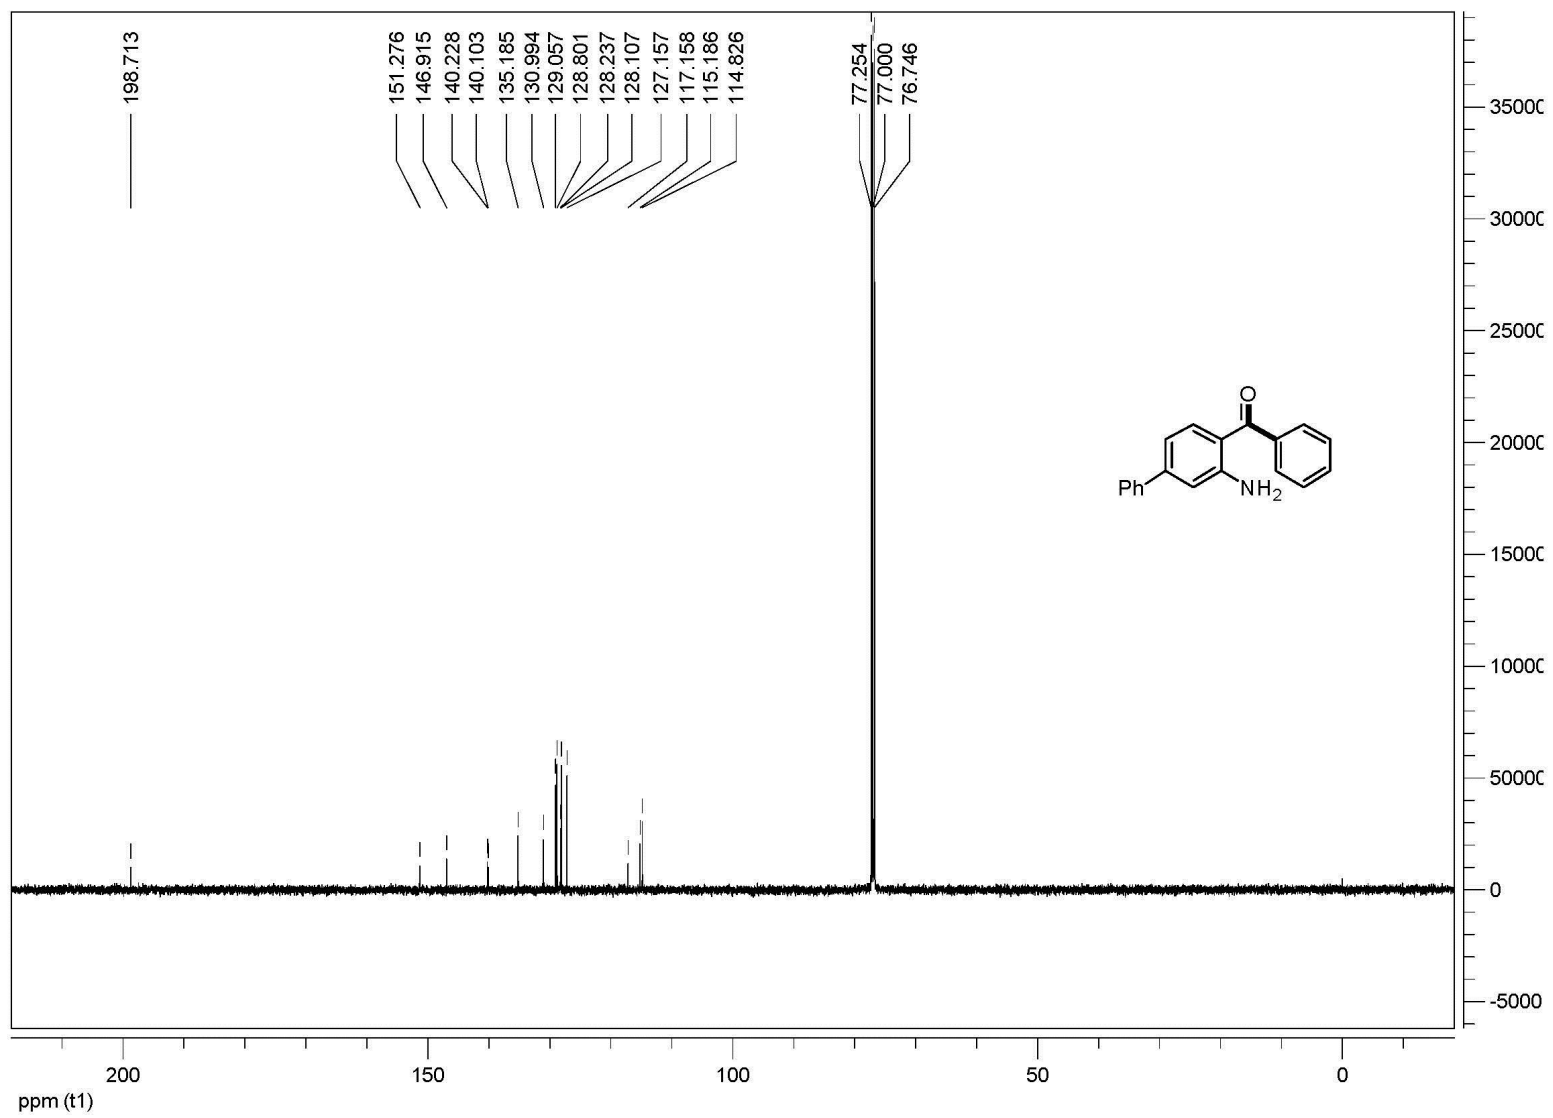

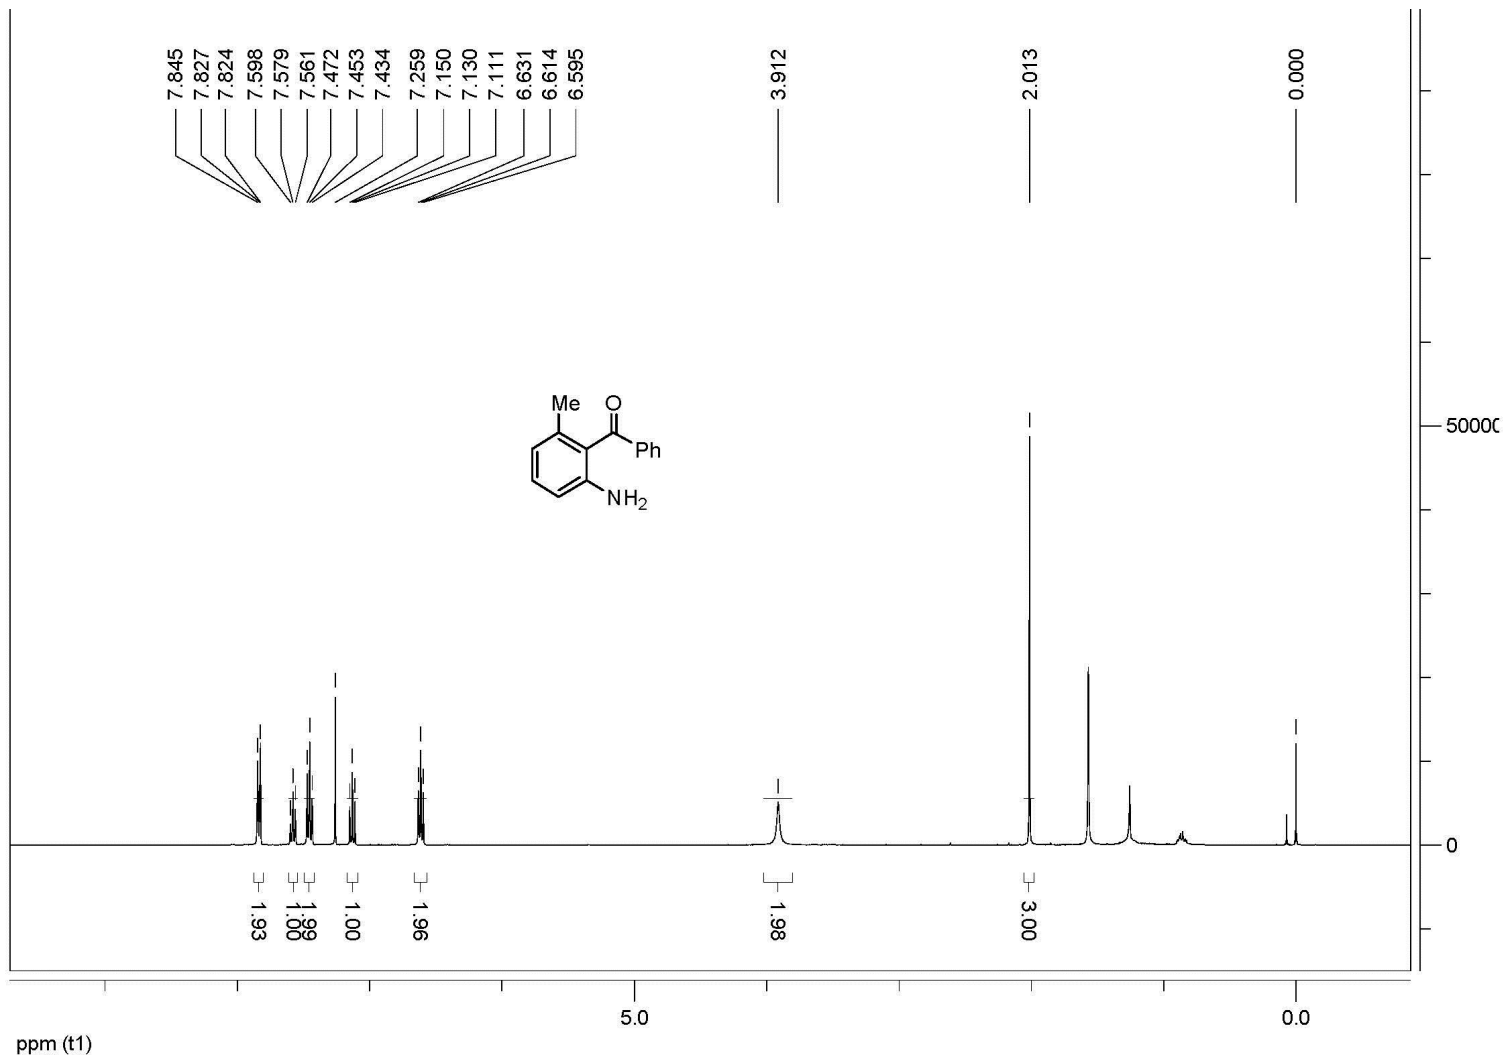

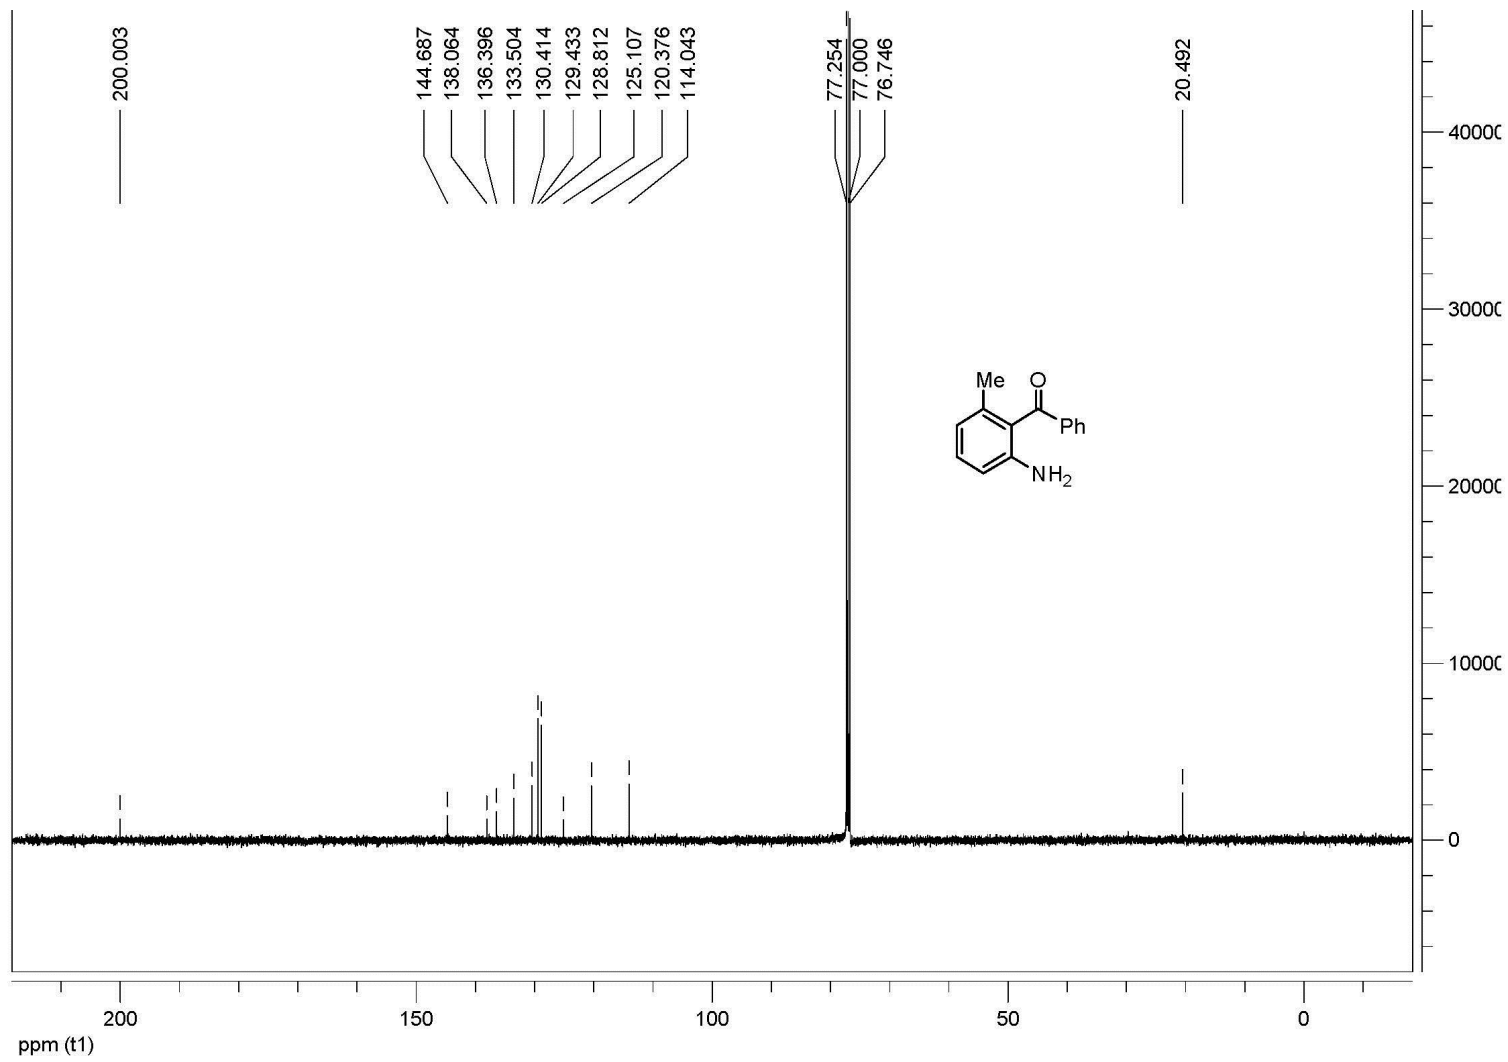

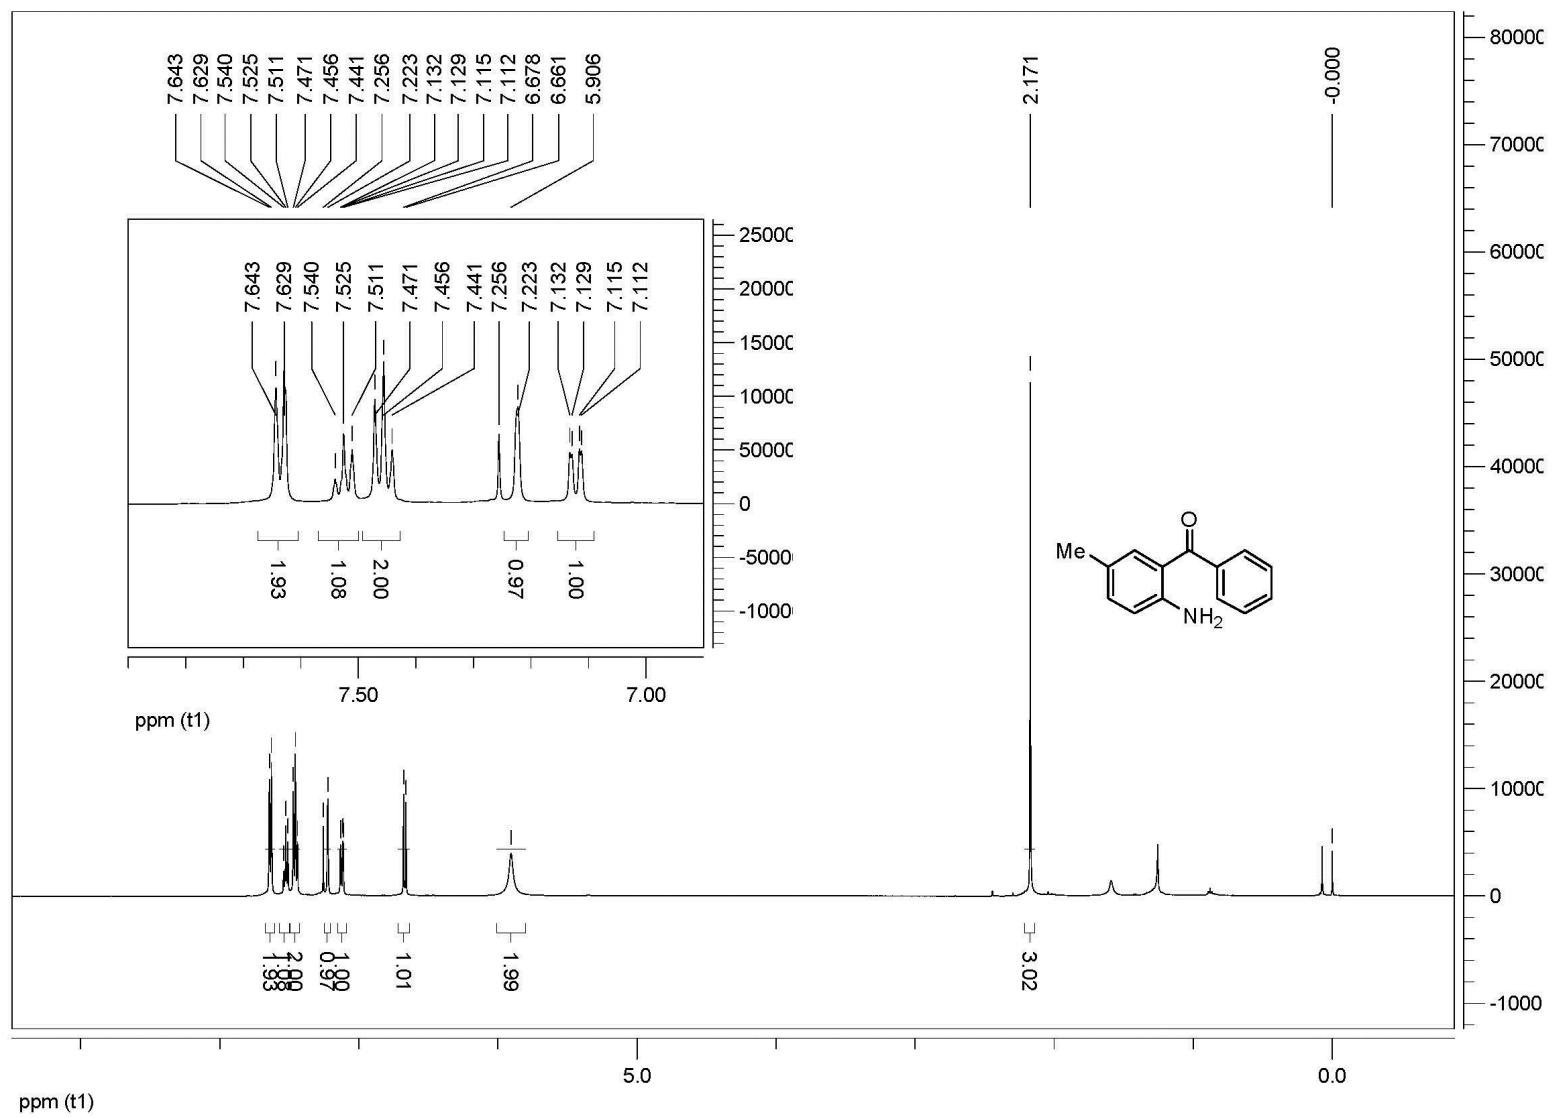

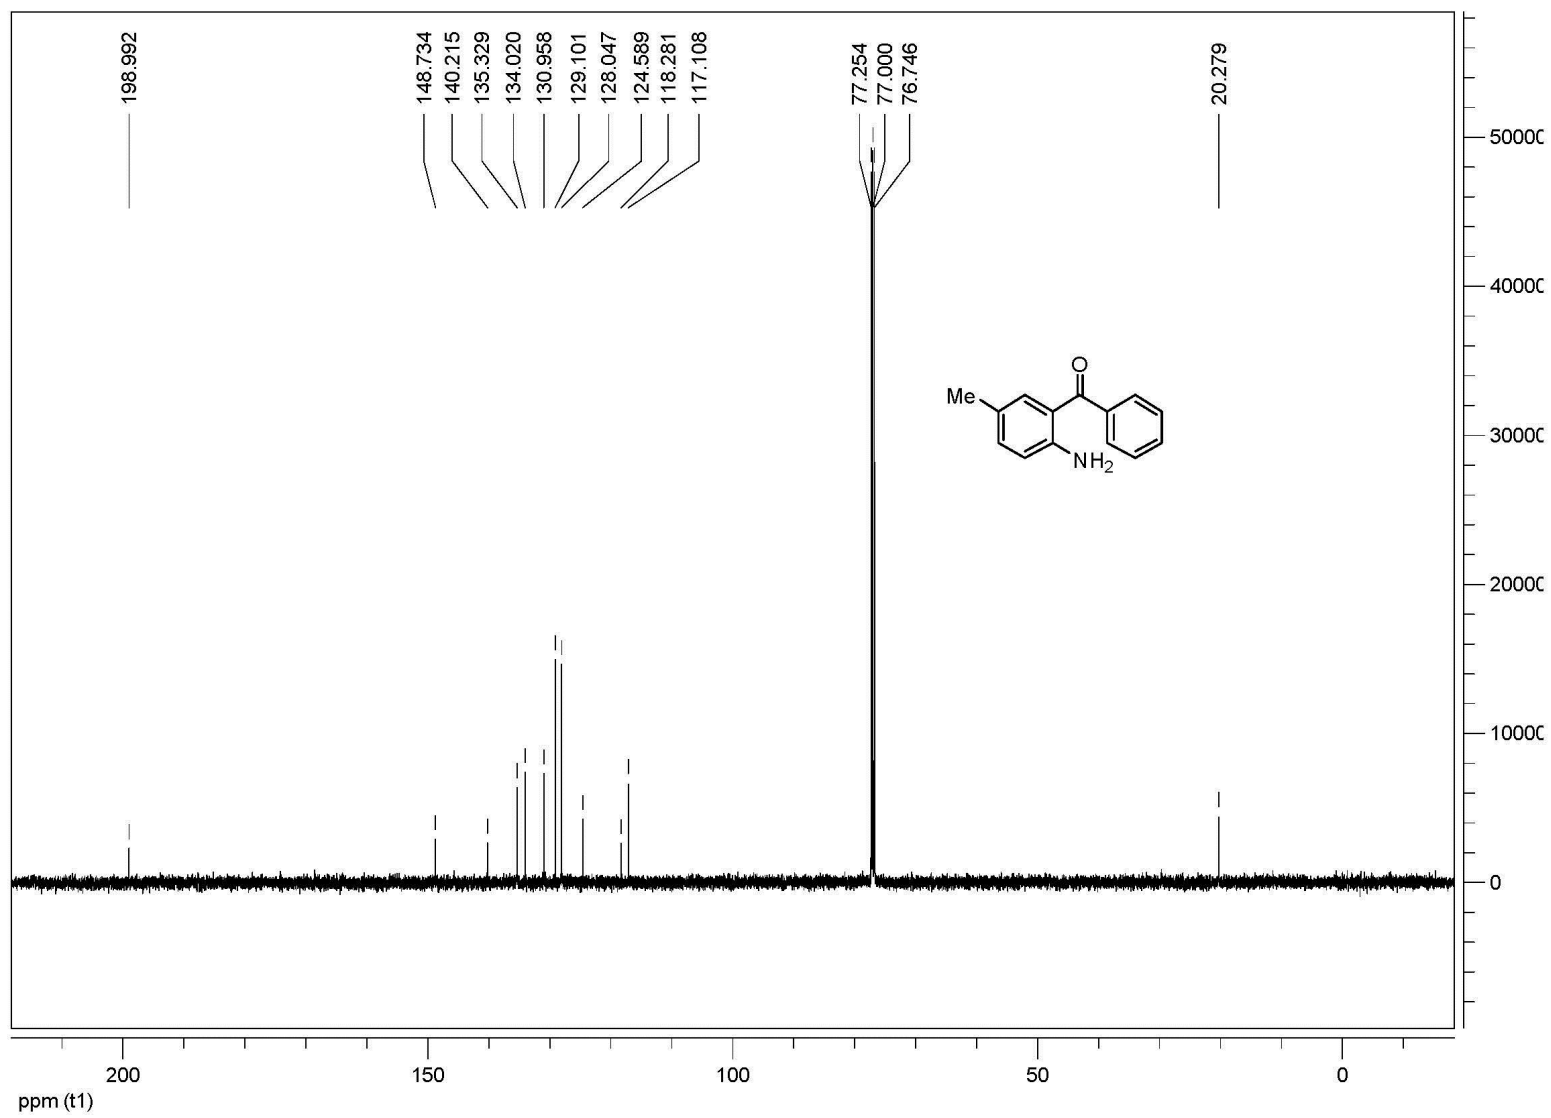

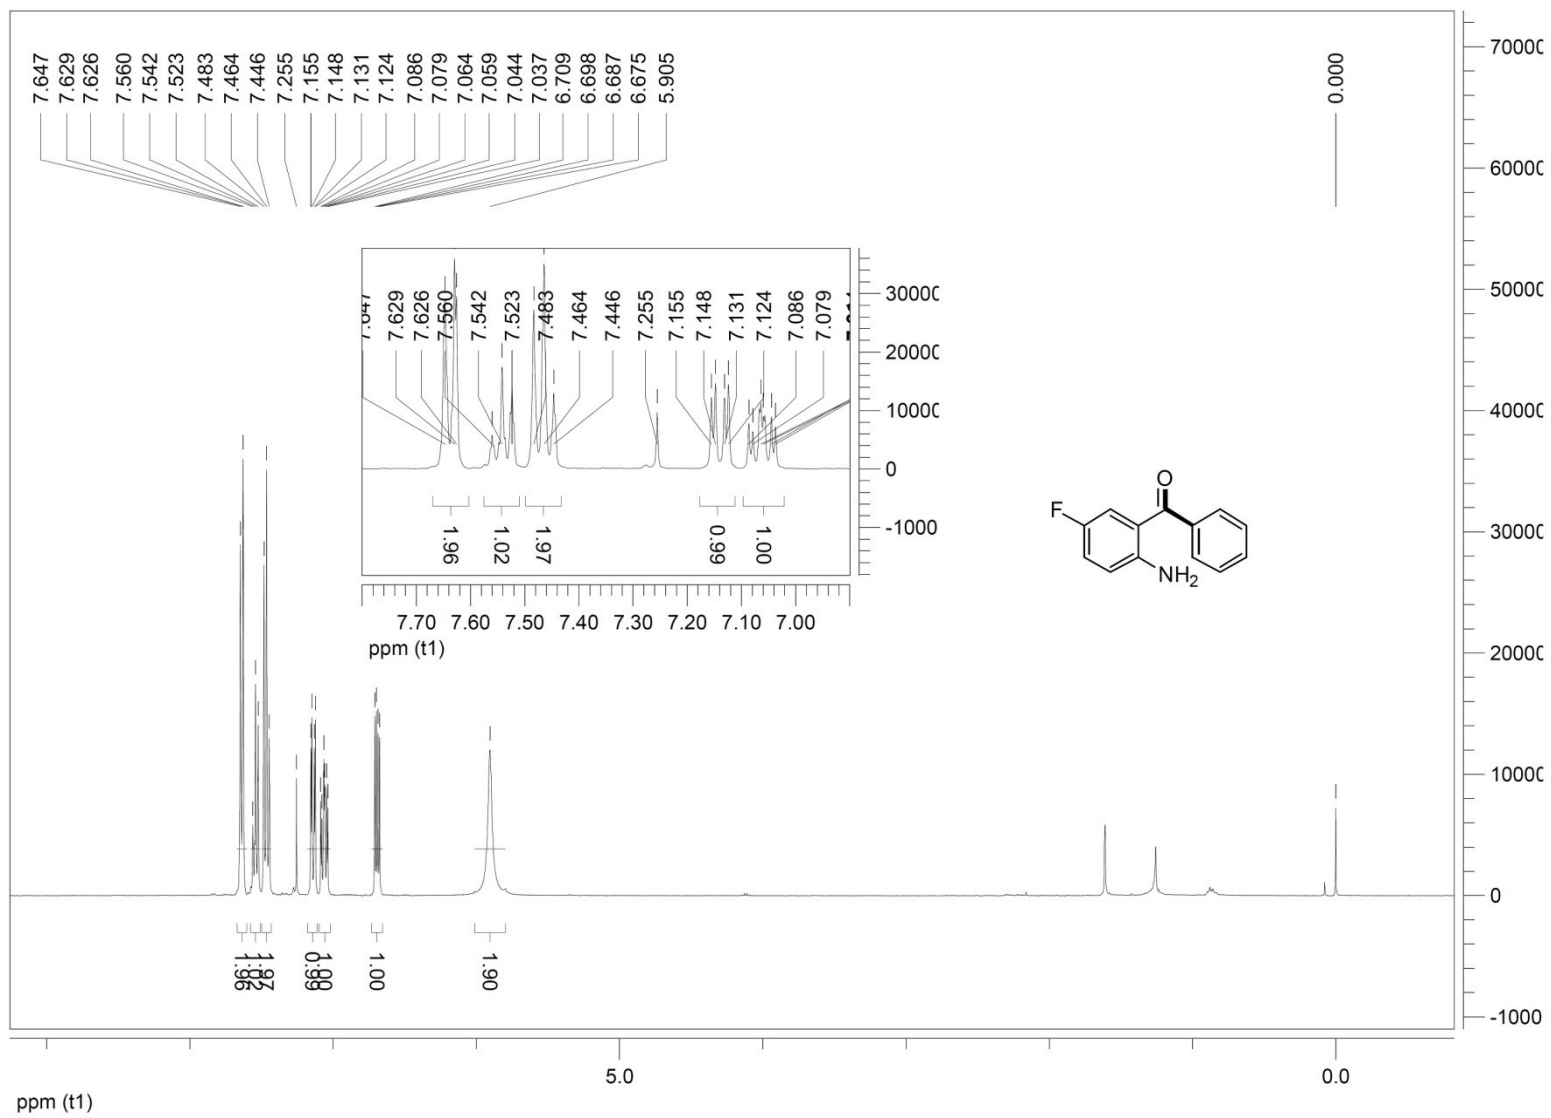



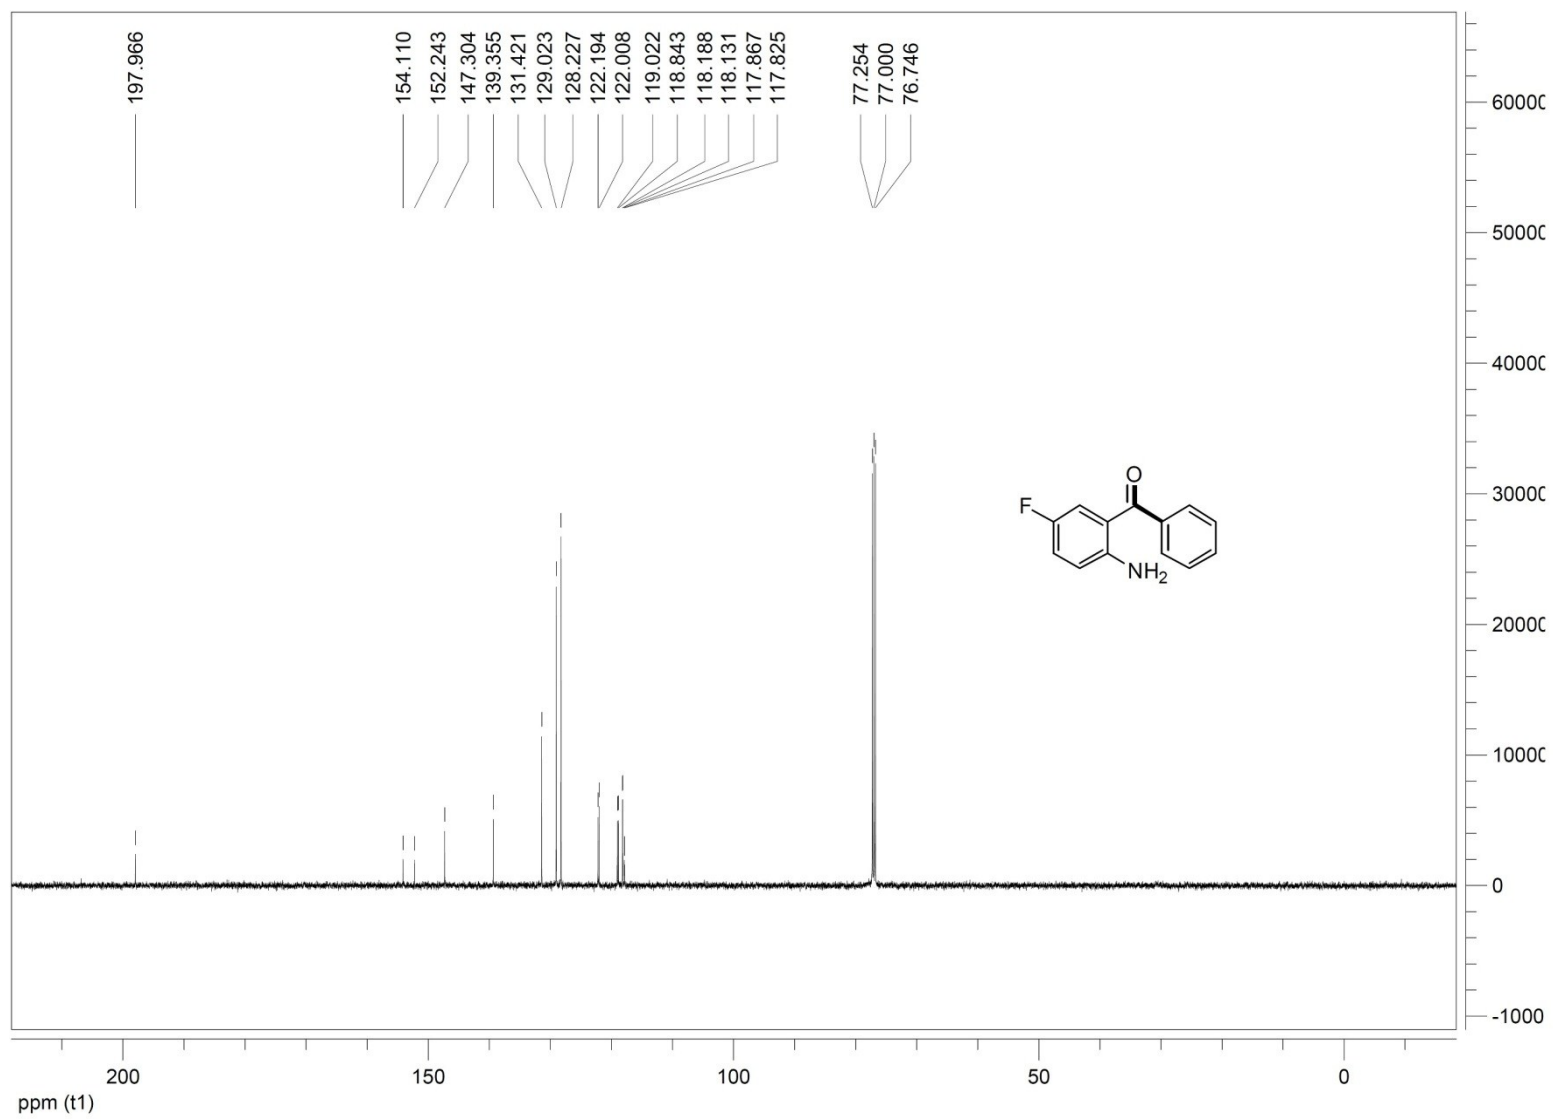

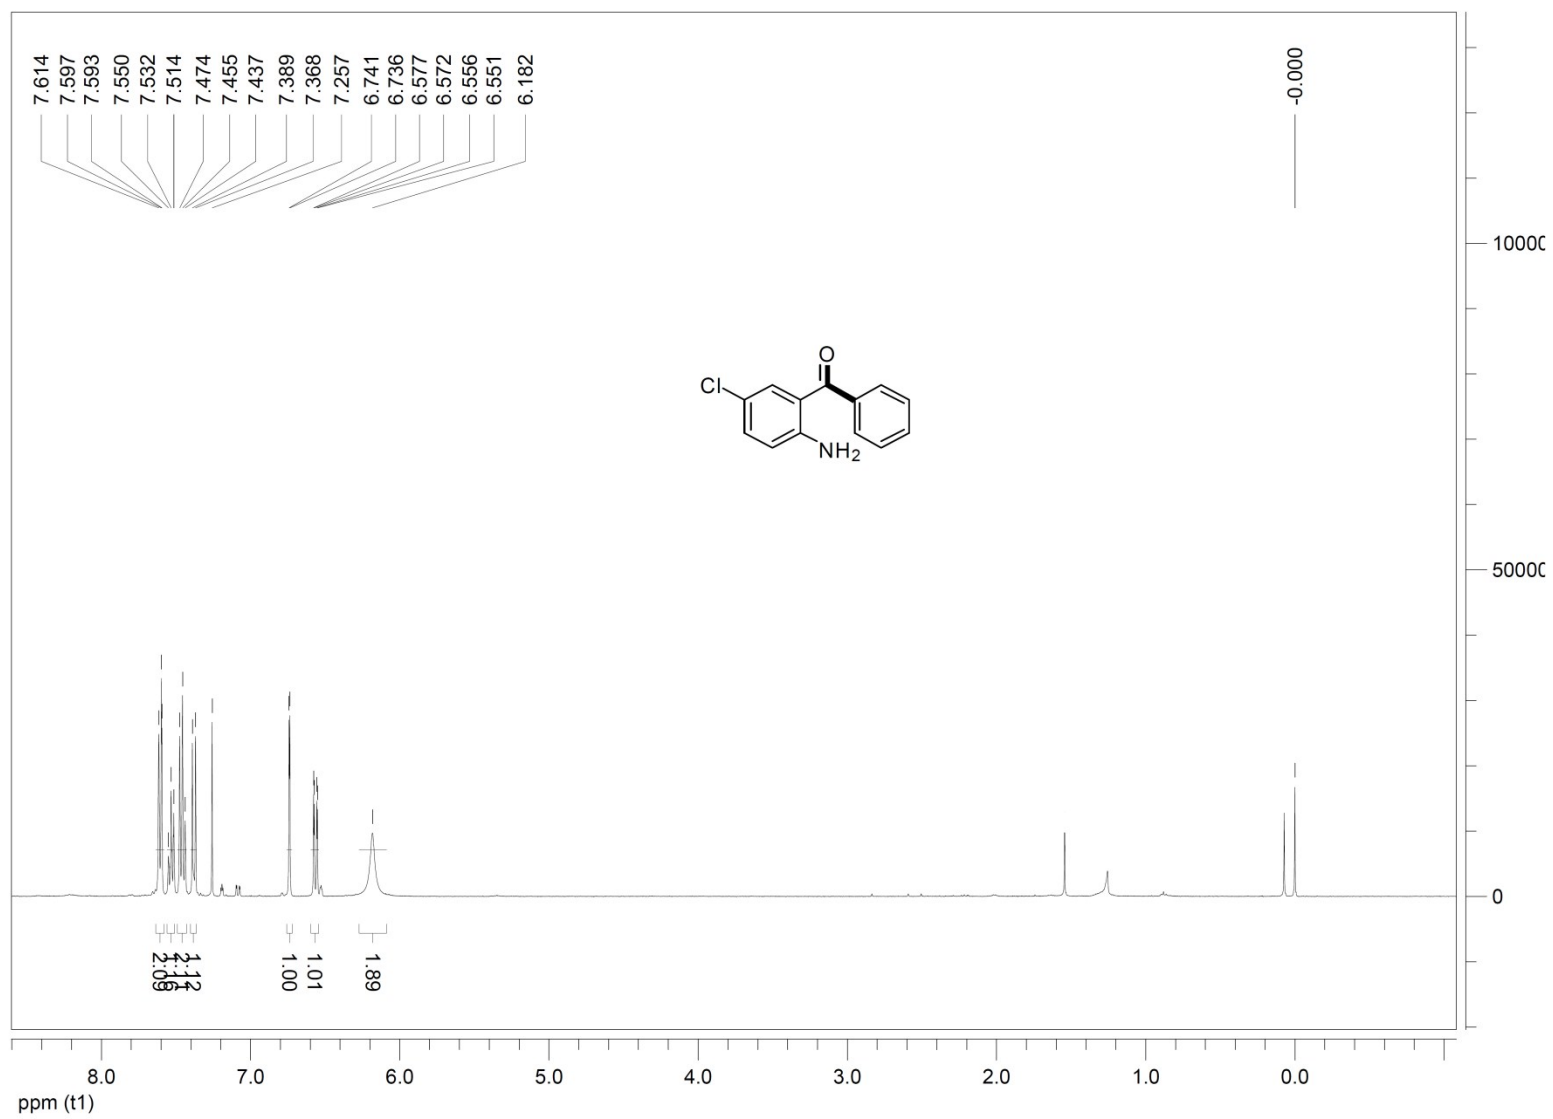

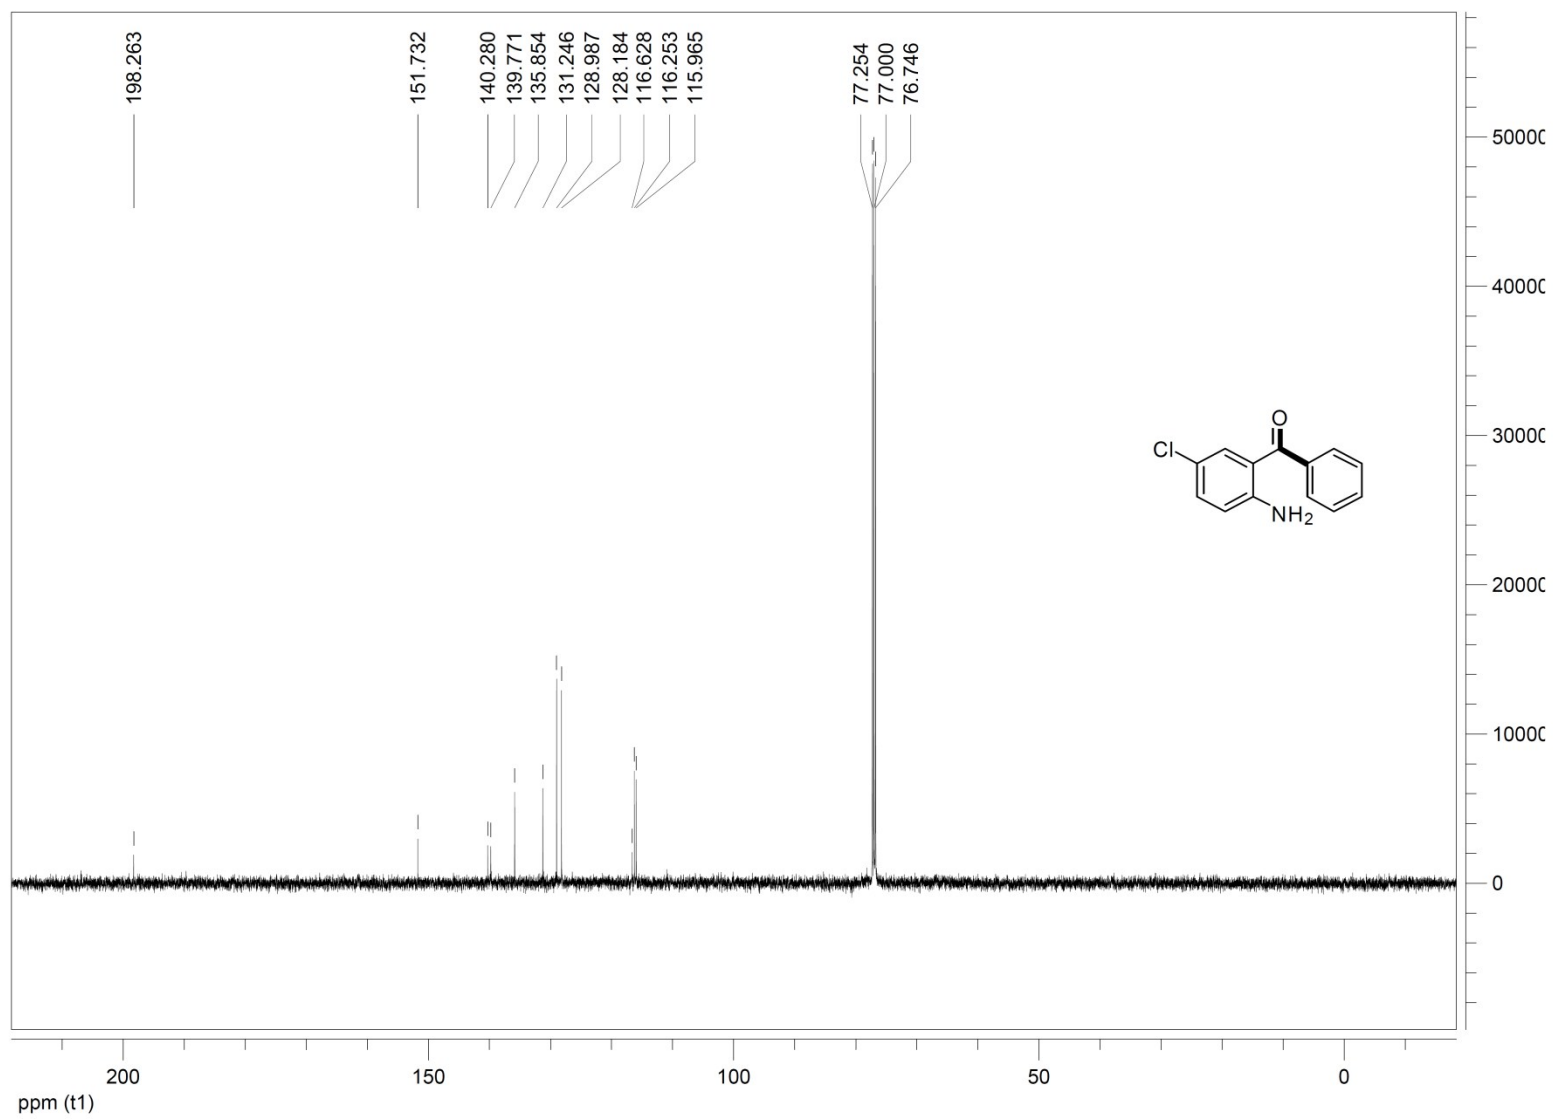

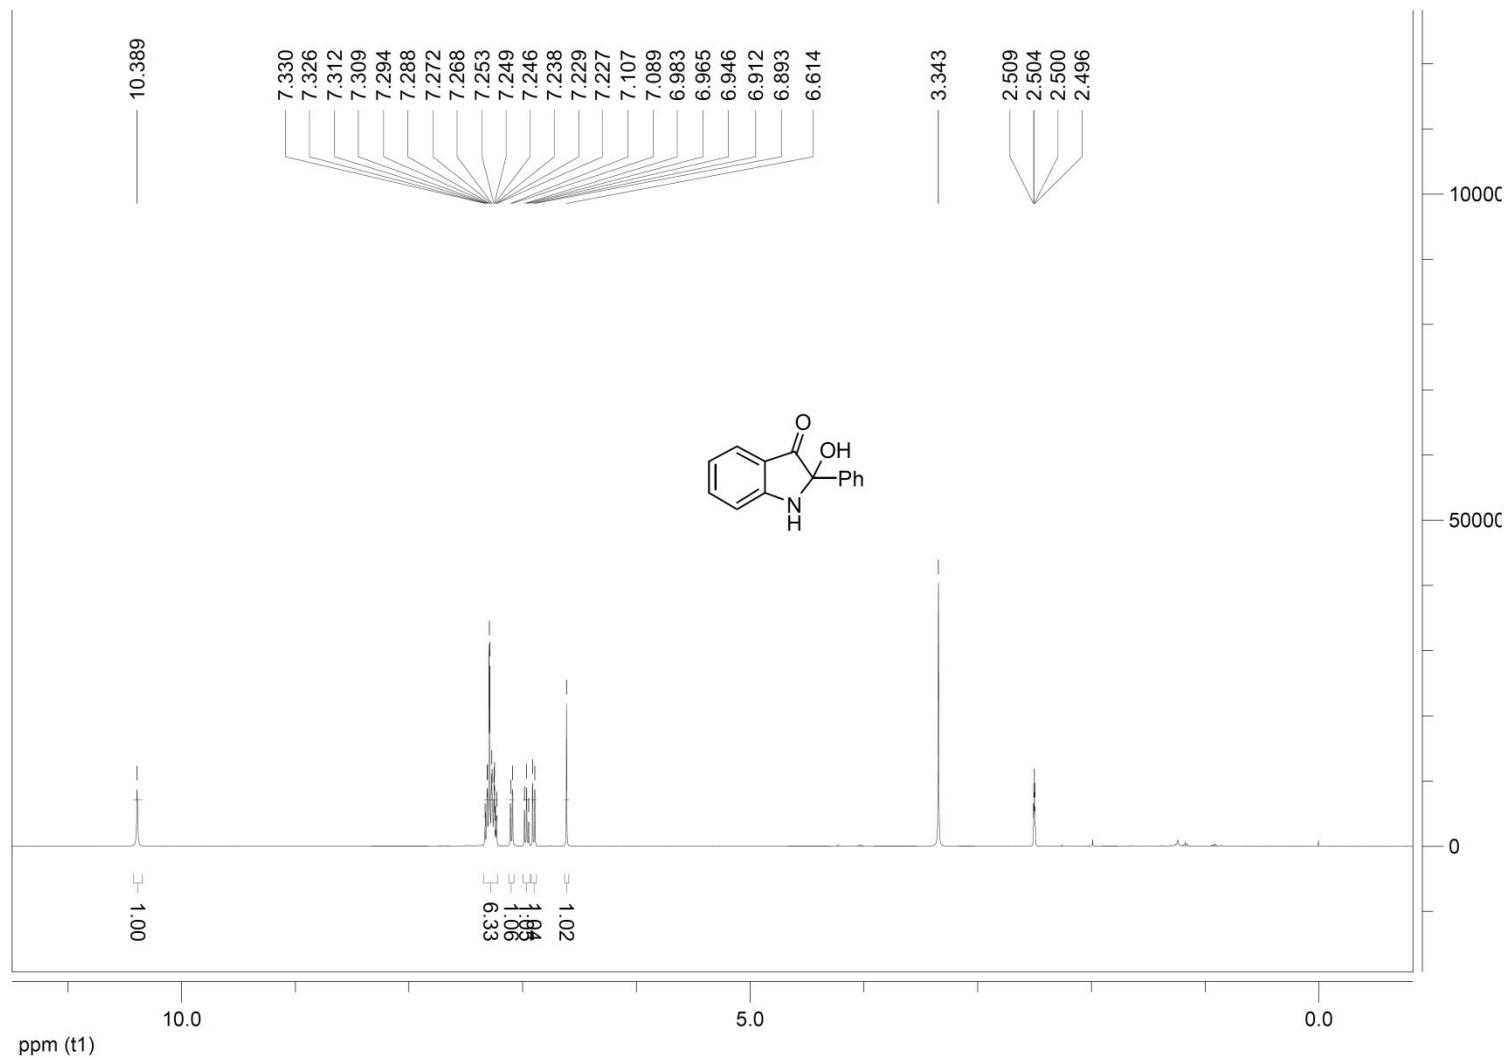

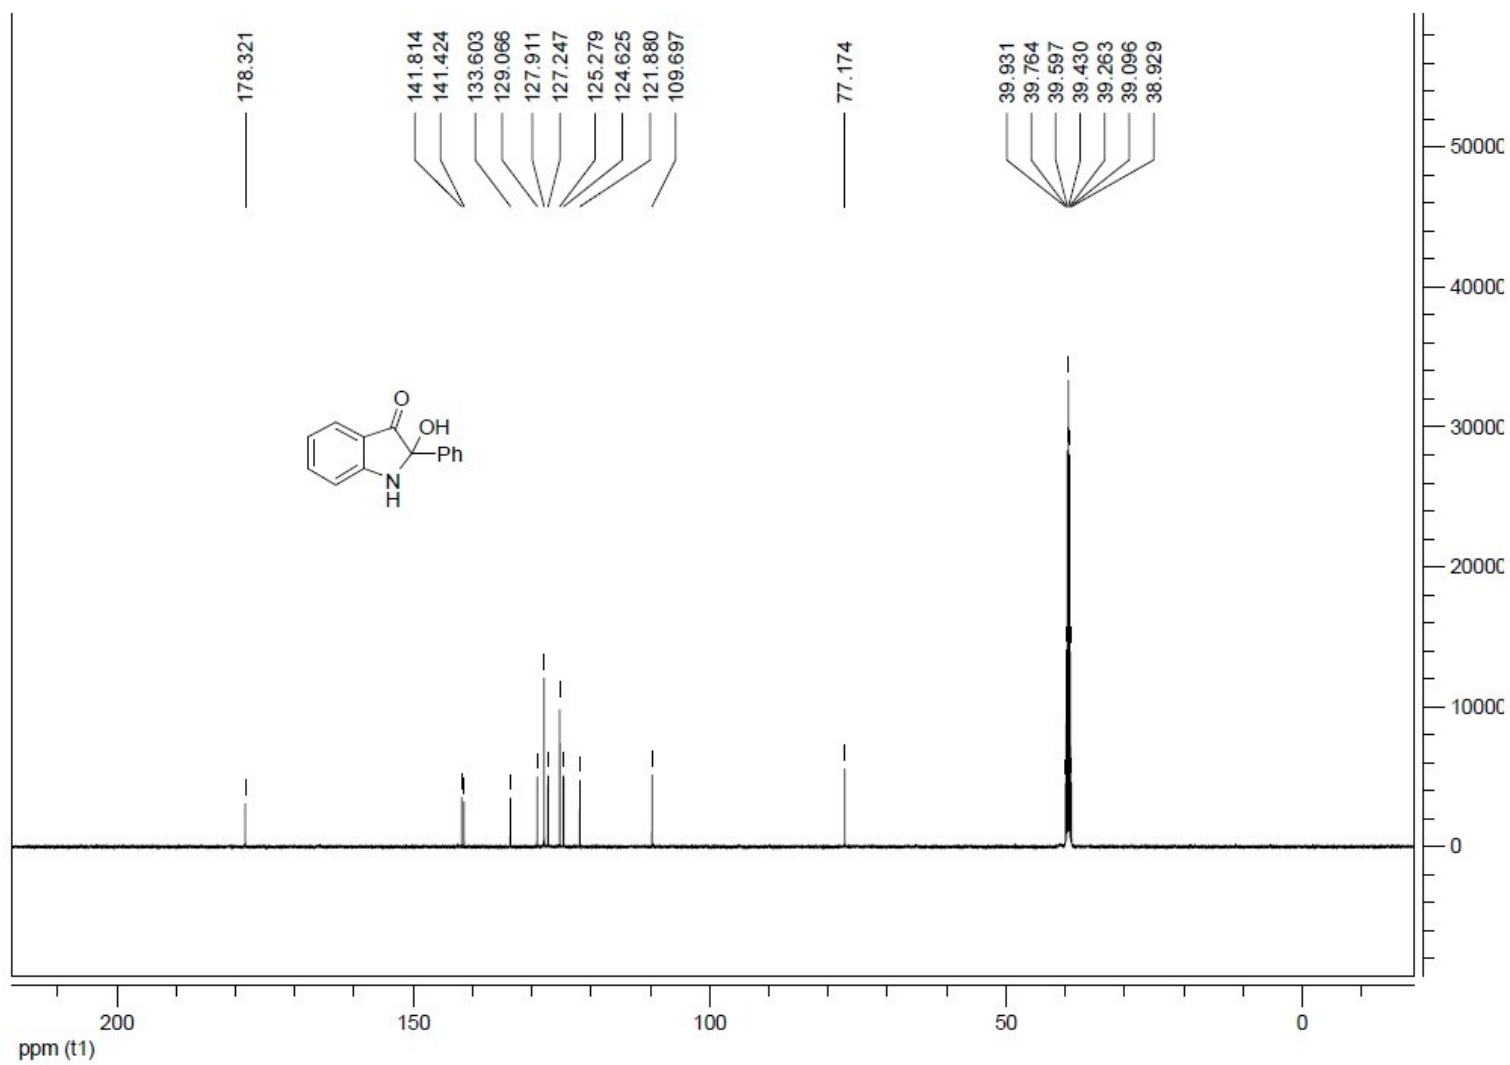

Supplement: c5qo00394f1.pdf [file c5qo00394f1.pdf]
